# Supplementary material for: Modular dehydrogenative cross-nucleophile coupling for direct construction of tetrasubstituted carbons
Source: Royal Society of Chemistry journal article supplement (doi:10.1039/d4qo01641f), 2024-11-12

## Supporting Information

### Modular Dehydrogenative Cross-nucleophile Coupling for Direct Construction of Tetrasubstituted Carbons

Peng Wang,<sup>†,a</sup> Qiang Wang,<sup>†,a</sup> Meng Wang,<sup>a</sup> Liang Wang,<sup>a</sup> Lubin Xu,<sup>a</sup> Xiong-Li Liu,<sup>b</sup> Fangzhi Hu,<sup>\*,a</sup> Shuai-Shuai Li<sup>\*,a</sup>

<sup>a</sup> College of Chemistry and Pharmaceutical Sciences, Qingdao Agricultural University, Qingdao 266109, China.

<sup>b</sup> National & Local Joint Engineering Research Center for the Exploitation of Homology Resources of Southwest Medicine and Food, Guizhou University, Guiyang 550025, P. R. China.

<sup>†</sup> These authors contributed equally.

**Corresponding Author**

\*E-mail: [flyshuaishuai@126.com](mailto:flyshuaishuai@126.com).

\*E-mail: [ssfangzhi@126.com](mailto:ssfangzhi@126.com).

### Table of Contents

|                                                             |            |
|-------------------------------------------------------------|------------|
| <b>1. General Information.....</b>                          | <b>S2</b>  |
| <b>2. General Procedure.....</b>                            | <b>S2</b>  |
| <b>3. Mechanistic Studies.....</b>                          | <b>S7</b>  |
| <b>4. Competing Experiments.....</b>                        | <b>S8</b>  |
| <b>5. Characterization of Products.....</b>                 | <b>S9</b>  |
| <b>6. Crystal Structures and Data.....</b>                  | <b>S31</b> |
| <b>7. <sup>1</sup>H and <sup>13</sup>C NMR Spectra.....</b> | <b>S35</b> |

## 1. General Information

Unless otherwise noted, all reagents and solvents were purchased from the commercial sources (from Adamas-beta) and used as received. Thin layer chromatography (TLC) was used to monitor the reaction on Merck 60 F254 precoated silica gel plate (0.2 mm thickness). TLC spots were visualized by UV-light irradiation on Spectroline Model ENF-24061/F 254 nm. The products were purified by flash column chromatography (200-300 mesh silica gel) eluted with the gradient of petroleum ether and ethyl acetate. Proton nuclear magnetic resonance spectra ( $^1\text{H}$  NMR) were recorded on a Bruker 500 MHz or 400 MHz NMR spectrometer ( $\text{CDCl}_3$  or  $\text{DMSO}-d_6$  solvent). The chemical shifts were reported in parts per million (ppm), downfield from  $\text{SiMe}_4$  ( $\delta$  0.0) and relative to the signal of chloroform-*d* ( $\delta$  7.26, singlet) or dimethyl sulfoxide-*d*<sub>6</sub> ( $\delta$  2.54, singlet). Multiplicities were afforded as: s (singlet); d (doublet); t (triplet); q (quartet); dd (doublets of doublet) or m (multiplets). The number of protons for a given resonance is indicated by nH. Coupling constants were reported as a *J* value in Hz. Carbon nuclear magnetic resonance spectra ( $^{13}\text{C}$  NMR) was referenced to the appropriate residual solvent peak. High resolution mass spectral analysis (HRMS) was performed on Waters XEVO G2 Q-TOF. 3-(2-hydroxyphenyl)indolin-2-ones were prepared according to literature.<sup>1</sup>

## 2. General Procedure

### 2.1 General Procedure for Construction of 3-(2-Hydroxyphenyl)benzofuran-2(3H)-one **7**

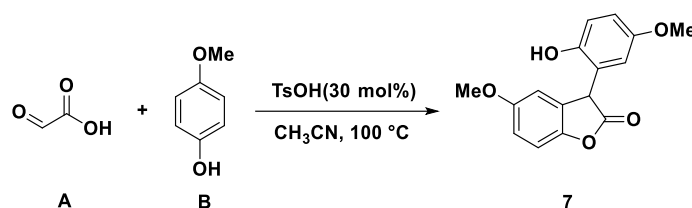

A round-bottom flask was charged with glyoxylic acid **A** (5 mmol), 4-methoxyphenol **B** (10 mmol), *p*-toluenesulfonic acid (30 mol%), and  $\text{CH}_3\text{CN}$  (20 mL). The mixture was stirred at  $100\text{ }^\circ\text{C}$  for 12 h. Upon completion of the reaction as indicated by TLC analysis,  $\text{H}_2\text{O}$  (20 mL) was added dropwise to the system and the resulting solution was extracted with EtOAc (20 mL  $\times$  3). The combined organic extracts were dried with anhydrous  $\text{Na}_2\text{SO}_4$  and concentrated in vacuo. The residue was purified by flash column chromatography on silica gel (petroleum ether: ethyl acetate, 5:1) to afford the desired 3-(2-hydroxyphenyl)benzofuran-2(3H)-one **7**.

### 2.2 General Procedure for Construction of *N*-ethyl-2,2-bis(2-hydroxyphenyl)acetamide **9**

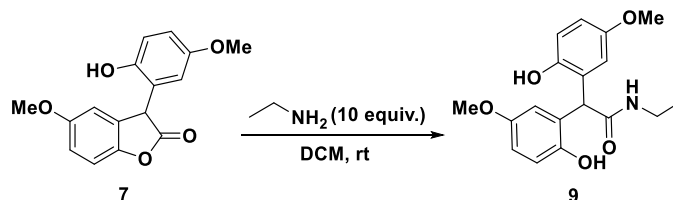

A round-bottom flask was charged with 3-(2-hydroxyphenyl)benzofuran-2(3H)-one **7** (1 mmol), ethylamine (10 mmol), and  $\text{DCM}$  (10 mL). The mixture was stirred at room temperature for 10 h. Upon completion of the reaction as indicated by TLC analysis,  $\text{H}_2\text{O}$  (10 mL) was added dropwise to the system and the resulting solution was extracted with  $\text{DCM}$  (10 mL  $\times$  3). The combined organic extracts were dried with anhydrous  $\text{Na}_2\text{SO}_4$  and concentrated in vacuo. The residue was purified by flash

column chromatography on silica gel (petroleum ether: ethyl acetate, 2:1) to afford the desired *N*-ethyl-2,2-bis(2-hydroxyphenyl)acetamide **9**.

### 2.3 General Procedure for Construction of the Lactam Derivatives 3

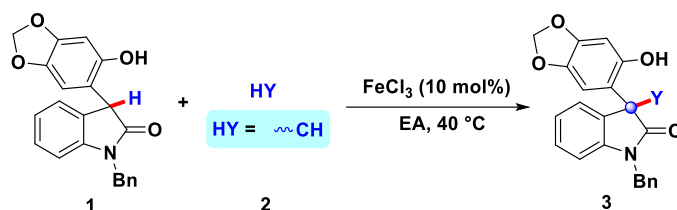

A tube was charged with 3-(2-hydroxyphenyl)indolin-2-one **1** (0.13 mmol), carbon-containing nucleophiles **2** (0.1 mmol), FeCl<sub>3</sub> (10 mol%), and EA (3.0 mL). The mixture was stirred at 40 °C. Upon completion of the reaction as indicated by TLC analysis, the mixture was concentrated in vacuum and the residue was directly purified by flash column chromatography on silica gel (petroleum ether: ethyl acetate, 8:1) to afford the desired the lactam derivatives **3a-3l**.

### 2.4 General Procedure for Construction of the Lactam Derivatives 4

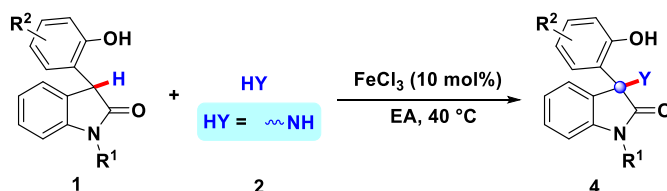

A tube was charged with 3-(2-hydroxyphenyl)indolin-2-one **1** (0.1 mmol), nitrogen-containing nucleophiles **2** (5 equiv., 0.5 mmol), FeCl<sub>3</sub> (10 mol%), and EA (3.0 mL). The mixture was stirred at 40 °C. Upon completion of the reaction as indicated by TLC analysis, the mixture was concentrated in vacuum and the residue was directly purified by flash column chromatography on silica gel (petroleum ether: ethyl acetate, 20:1) to afford the desired the lactam derivatives **4a-4l**.

### 2.5 General Procedure for Construction of the Lactam Derivatives 5

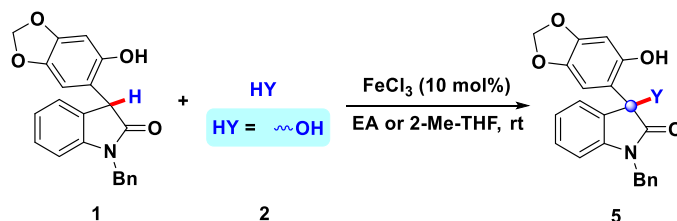

A tube was charged with 3-(2-hydroxyphenyl)indolin-2-one **1** (0.1 mmol), oxygen-containing nucleophiles **2** (0.2 mL), FeCl<sub>3</sub> (10 mol%), and EA (2.8 mL for **5a** and **5b**) or 2-Me-THF (2.8 mL for **5c-5j**). The mixture was stirred at room temperature. Upon completion of the reaction as indicated by TLC analysis, the mixture was concentrated in vacuum and the residue was directly purified by flash column chromatography on silica gel (petroleum ether: ethyl acetate, 10:1) to afford the desired the lactam derivatives **5a-5j**.

### 2.6 General Procedure for Construction of the Lactam Derivatives 6

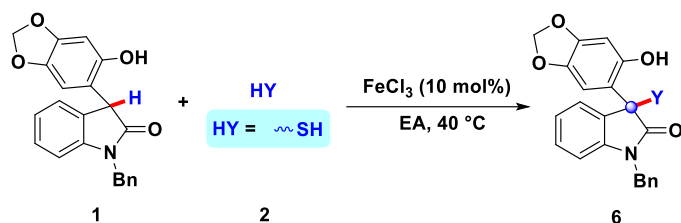

A tube was charged with 3-(2-hydroxyphenyl)indolin-2-one **1** (0.1 mmol), sulfur-containing nucleophiles **2** (2 equiv., 0.2 mmol), FeCl<sub>3</sub> (10 mol%), and EA (3.0 mL). The mixture was stirred at 40 °C. Upon completion of the reaction as indicated by TLC analysis, the mixture was concentrated in vacuum and the residue was directly purified by flash column chromatography on silica gel (petroleum ether: ethyl acetate, 8:1) to afford the desired the lactam derivatives **6a-6f**.

### 2.7 General Procedure for Construction of the Lactone Derivatives **8**

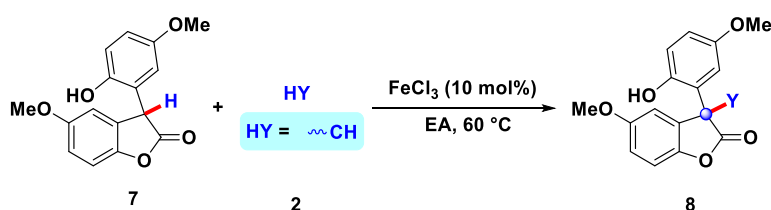

A tube was charged with 3-(2-hydroxyphenyl)benzofuran-2(3H)-one **7** (0.13 mmol), carbon-containing nucleophiles **2** (0.1 mmol), FeCl<sub>3</sub> (10 mol%), and EA (3.0 mL). The mixture was stirred at 60 °C. Upon completion of the reaction as indicated by TLC analysis, the mixture was concentrated in vacuum and the residue was directly purified by flash column chromatography on silica gel (petroleum ether: ethyl acetate, 8:1) to afford the desired the lactone derivatives **8a-8c**.

### 2.8 General Procedure for Construction of the Lactone Derivatives **8**

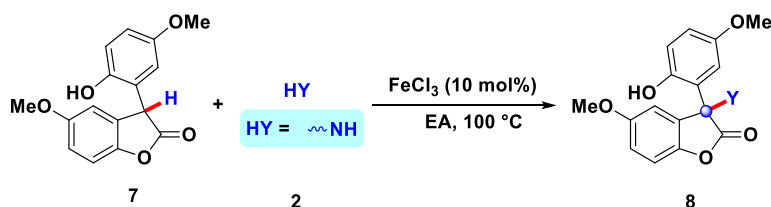

A sealed tube was charged with 3-(2-hydroxyphenyl)benzofuran-2(3H)-one **7** (0.1 mmol), nitrogen-containing nucleophiles **2** (5 equiv., 0.5 mmol), FeCl<sub>3</sub> (10 mol%), and EA (3.0 mL). The mixture was stirred at 100 °C. Upon completion of the reaction as indicated by TLC analysis, the mixture was concentrated in vacuum and the residue was directly purified by flash column chromatography on silica gel (petroleum ether: ethyl acetate, 15:1) to afford the desired the lactone derivatives **8d-8e**.

### 2.9 General Procedure for Construction of the Lactone Derivatives **8**

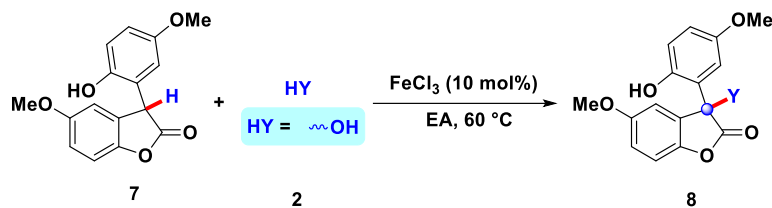

A tube was charged with 3-(2-hydroxyphenyl)benzofuran-2(3*H*)-one **7** (0.1 mmol), oxygen-containing nucleophiles **2** (0.2 mL), FeCl<sub>3</sub> (10 mol%), and EA (3.0 mL). The mixture was stirred at 60 °C. Upon completion of the reaction as indicated by TLC analysis, the mixture was concentrated in vacuum and the residue was directly purified by flash column chromatography on silica gel (petroleum ether: ethyl acetate, 10:1) to afford the desired the lactone derivative **8f**.

## 2.10 General Procedure for Construction of the Lactone Derivatives **8**

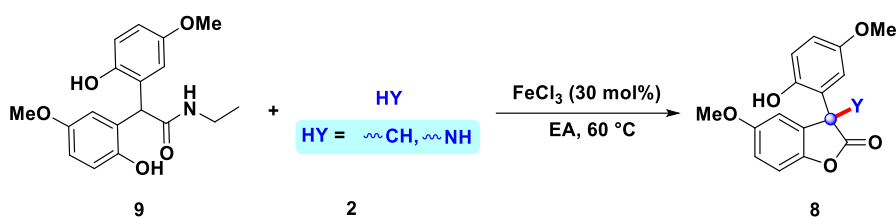

A sealed tube was charged with N-ethyl-2,2-bis(2-hydroxyphenyl)acetamide **9** (0.1 mmol), carbon-containing nucleophiles **2** (1.5 equiv., 0.15 mmol) or nitrogen-containing nucleophiles **2** (5 equiv. 0.5 mmol), FeCl<sub>3</sub> (30 mol%), and EA (3.0 mL). The mixture was stirred at 100 °C. Upon completion of the reaction as indicated by TLC analysis, the mixture was concentrated in vacuum and the residue was directly purified by flash column chromatography on silica gel (petroleum ether: ethyl acetate, 10:1) to afford the desired the lactone derivatives **8a-8e**.

## 2.11 General Procedure for Synthesis of Benzofuroindoline **11**

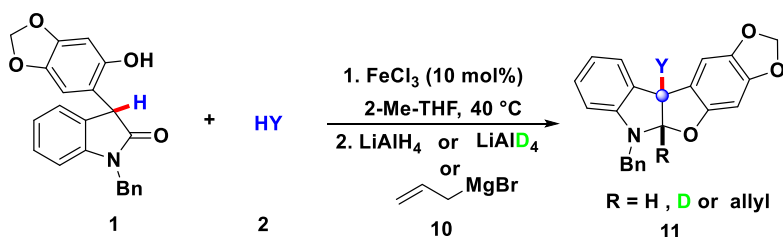

A tube was charged with 3-(2-hydroxyphenyl)indolin-2-one **1** (0.13 mmol), nucleophiles **2** (0.1 mmol), FeCl<sub>3</sub> (10 mol%), and 2-Me-THF (3.0 mL). The mixture was stirred at 40 °C. Upon completion of the reaction as indicated by TLC analysis, H<sub>2</sub>O (5 mL) was added dropwise to the system and the resulting solution was extracted with EtOAc (5 mL×3). The combined organic extracts were dried with anhydrous Na<sub>2</sub>SO<sub>4</sub> and concentrated in vacuo. The residue could be used in next step without needing to purify. Then LiAlH<sub>4</sub> or LiAlD<sub>4</sub> or allylmagnesium bromide (5 equiv.) was added, and the mixture was stirred in 2-Me-THF (3 mL) at room temperature. Upon completion of the reaction as indicated by TLC analysis, the mixture was concentrated in vacuum and the residue was directly purified by flash column chromatography on silica gel (petroleum ether: ethyl acetate, 20:1) to afford the desired the benzofuroindolines **11a-11f**.

## 2.12 General Procedure for Synthesis of Benzofuran 12

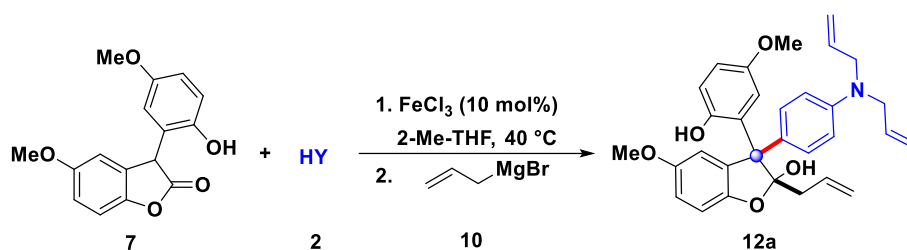

A tube was charged with 3-(2-hydroxyphenyl)benzofuran-2(3*H*)-one **7** (0.13 mmol), nucleophiles **2** (0.1 mmol), FeCl<sub>3</sub> (10 mol%), and 2-Me-THF (3.0 mL). The mixture was stirred at 40 °C. Upon completion of the reaction as indicated by TLC analysis, H<sub>2</sub>O (5 mL) was added dropwise to the system and the resulting solution was extracted with EtOAc (5 mL×3). The combined organic extracts were dried with anhydrous Na<sub>2</sub>SO<sub>4</sub> and concentrated in vacuo. The residue could be used in next step without needing to purify. Then allylmagnesium bromide (5 equiv.) was added, and the mixture was stirred in 2-Me-THF (3 mL) at room temperature. Upon completion of the reaction as indicated by TLC analysis, the mixture was concentrated in vacuum and the residue was directly purified by flash column chromatography on silica gel (petroleum ether: ethyl acetate, 20:1) to afford the desired the benzofuran **12a**.

## 2.13 General Procedure for Synthesis of the Lactam Derivative 13

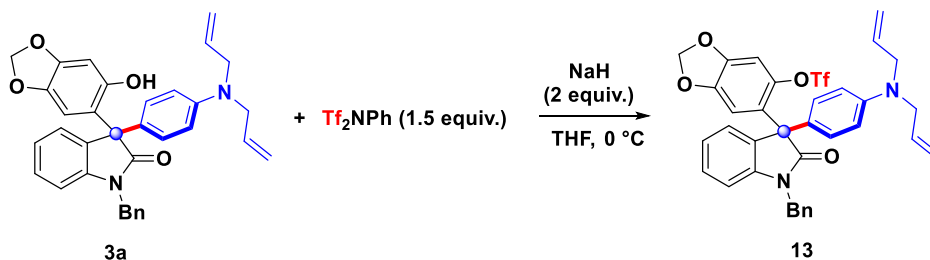

To a stirred solution of 3,3-diaryl oxindole **3a** (0.1 mmol) in dry THF (2.0 mL) was added NaH (2 equiv.) at 0 °C, and stirred for 0.5 h. Tf<sub>2</sub>NPh (1.5 equiv.) was then added, and the resulting mixture was stirred for 2 h. Upon completion of the reaction as indicated by TLC analysis, the mixture was concentrated in vacuum and the residue was directly purified by flash column chromatography on silica gel (petroleum ether: ethyl acetate, 15:1) to give the desired the lactam derivative **13**.

## 2.14 General Procedure for Synthesis of Triarylmethane 14

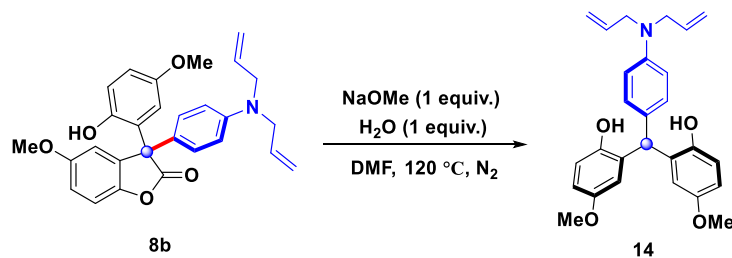

A shrek tube was charged with the lactone derivative **8b** (0.1 mmol), NaOMe (1 equiv.), H<sub>2</sub>O (1 equiv.), and DMF (2.0 mL) under N<sub>2</sub> atmosphere. The mixture was stirred at 120 °C. Upon completion of the reaction as indicated by TLC analysis, the mixture was concentrated in vacuum and the residue

was directly purified by flash column chromatography on silica gel (petroleum ether: ethyl acetate, 5:1) to afford the desired triarylmethane **14**.

### 3. Mechanistic Studies

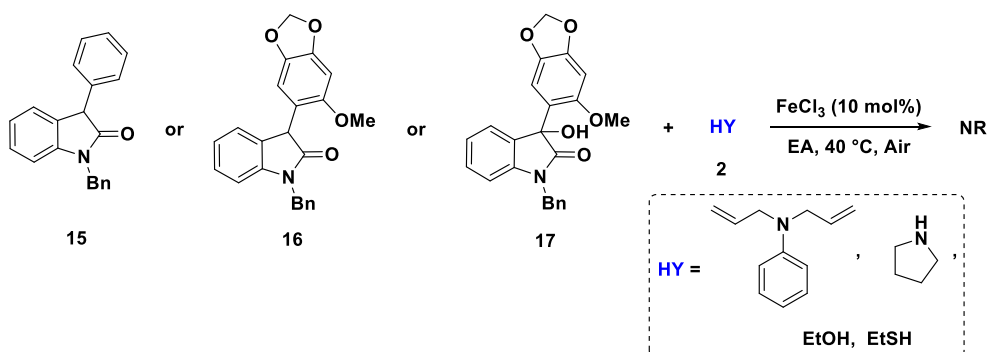

A sealed tube was charged with 3-phenylindolin-2-one **15** or 3-(2-methoxyphenyl)indolin-2-one **16** or 3-hydroxy-3-(2-methoxyphenyl)indolin-2-one **17** (0.1 mmol), nucleophiles **2** (1.5 equiv., 0.15 mmol),  $\text{FeCl}_3$  (10 mol%), and EA (3.0 mL). The mixture was stirred at 40 °C. The reaction as indicated by TLC analysis.

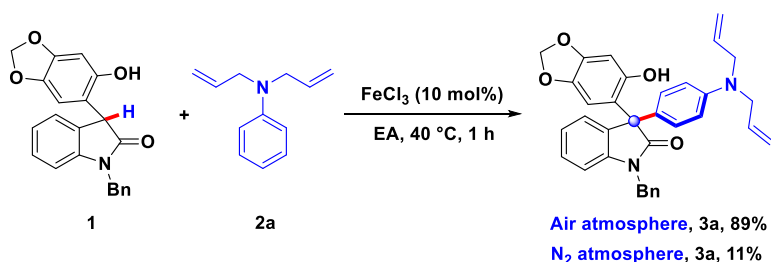

A tube was charged with 3-(2-hydroxyphenyl)indolin-2-one **1** (0.13 mmol), nucleophile **2a** (0.1 mmol),  $\text{FeCl}_3$  (10 mol%), and EA (3.0 mL) under air or  $\text{N}_2$  atmosphere. The mixture was stirred at 40 °C. The reaction as indicated by TLC analysis, the mixture was concentrated in vacuum and the residue was directly purified by flash column chromatography on silica gel (petroleum ether: ethyl acetate, 8:1) to afford the desired the lactam derivative **3a** in 89% yield (air) or 11% yield ( $\text{N}_2$ ).

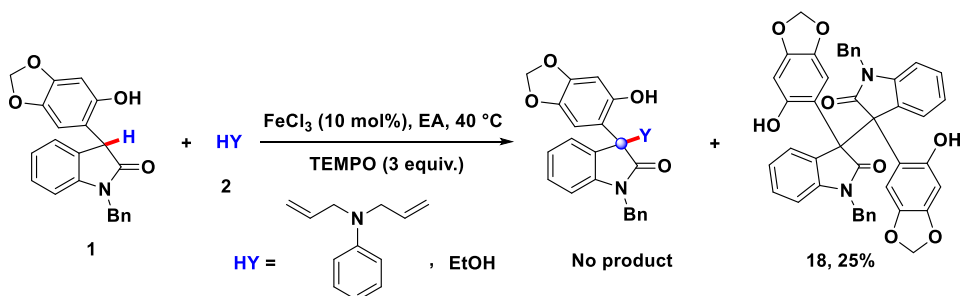

A tube was charged with 3-(2-hydroxyphenyl)indolin-2-one **1** (0.13 mmol), nucleophiles **2** (0.1 mmol),  $\text{FeCl}_3$  (10 mol%), TEMPO (3 equiv.), and EA (3.0 mL). The mixture was stirred at 40 °C. The reaction as indicated by TLC analysis, the mixture was concentrated in vacuum and the residue was directly purified by flash column chromatography on silica gel (petroleum ether: ethyl acetate, 3:1) to afford the desired dimeric product **18**.

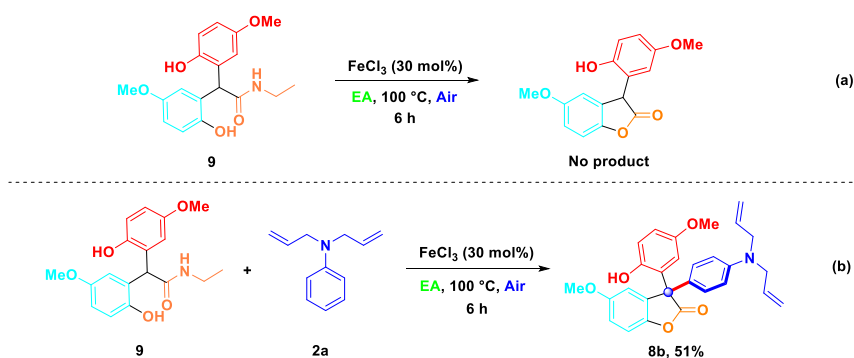

The reaction process of the cyclization for formation of lactones was further investigated. The acyclic substrate **9** bearing *ortho*-hydroxyl benzylic tertiary C(sp<sup>3</sup>)-H was subjected to the optimal reaction conditions without adding nucleophile. As a result, no cyclic product was observed and substrate **9** was decomposed in 6 h (a). When nucleophile **2a** was added, the cascade CDC/cyclization process took place fluently at the same time (6 h), giving the 3,3-disubstituted lactone **8b** in 51% yield (b). These results indicated that the intramolecular cyclization occurred followed by the CDC process to form the thermodynamically stable lactone (Scheme S1).

#### Scheme S1. Proposed Mechanism for Formation of Lactone **8** From Acyclic Substrate **9**.

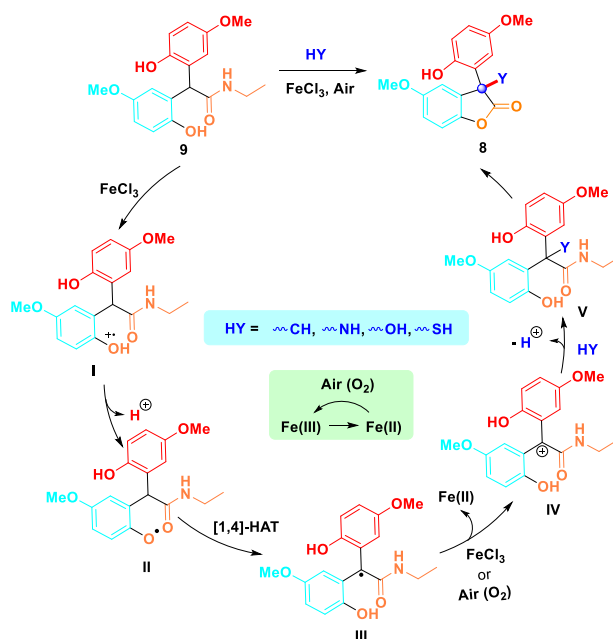

#### 4. Competing Experiments

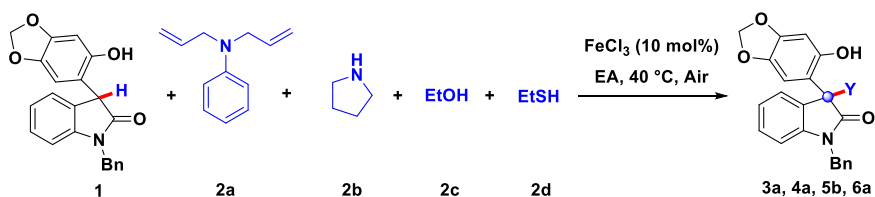

A tube was charged with 3-(2-hydroxyphenyl)indolin-2-one **1** (0.1 mmol), nucleophile **2a** (0.1 mmol), nucleophile **2b** (0.1 mmol), nucleophile **2c** (0.1 mmol), nucleophile **2d** (0.1 mmol), FeCl<sub>3</sub> (10 mol%), and EA (3.0 mL). The mixture was stirred at 40 °C. The reaction as indicated by TLC analysis,



the mixture was concentrated in vacuum and the residue was directly purified by flash column chromatography on silica gel (petroleum ether: ethyl acetate, 10:1) to afford the desired the lactam derivatives **3a** (12% yield), **4a** (10% yield), **5b** (7% yield), **6a** (40% yield).

### Scheme S2. Competing Experiment

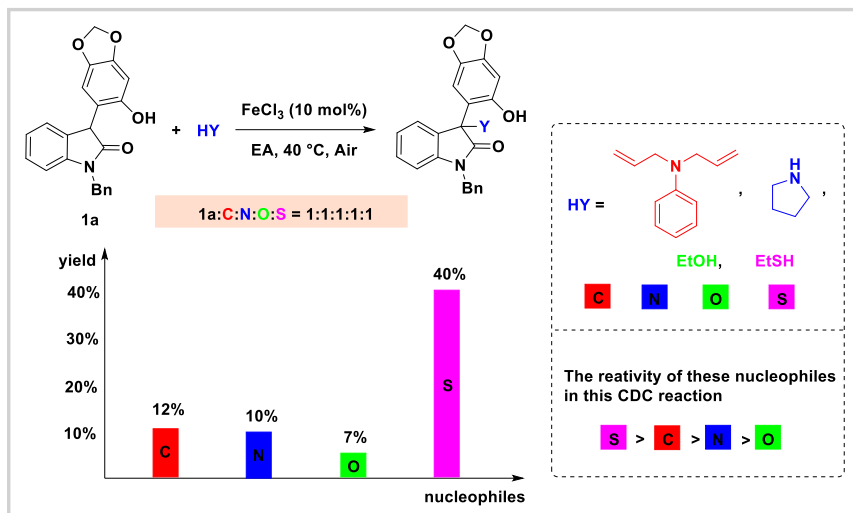

## 5. Characterization of Products

### 1-benzyl-3-(4-(diallylamino)phenyl)-3-(6-hydroxybenzo[*d*][1,3]dioxol-5-yl)indolin-2-one (**3a**)

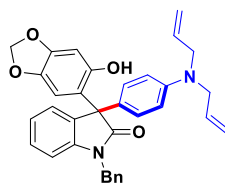

Flash column chromatography on a silica gel (petroleum ether: ethyl acetate, 8:1) afforded the product as a white solid (47.2 mg, 89% yield). M.p. 181 - 183 °C.

$^1\text{H NMR}$  (400 MHz,  $\text{CDCl}_3$ )  $\delta$  9.23 (s, 1H), 7.34 – 7.23 (m, 5H), 7.17 – 7.11 (m, 2H), 7.04 (td,  $J = 7.5$ , 1.1 Hz, 1H), 6.95 – 6.91 (m, 2H), 6.82 – 6.79 (m, 1H), 6.59 – 6.56 (m, 2H), 6.56 (s, 1H), 6.51 (s, 1H), 5.88 (d,  $J = 1.4$  Hz, 1H), 5.85 – 5.74 (m, 3H), 5.17 – 5.09 (m, 4H), 5.07 (d,  $J = 15.9$  Hz, 1H), 4.90 (d,  $J = 15.7$  Hz, 1H), 3.89 – 3.78 (m, 4H).  $^{13}\text{C NMR}$  (100 MHz,  $\text{CDCl}_3$ )  $\delta$  181.6, 152.7, 148.1, 148.1, 141.2, 140.8, 135.3, 140.0, 133.3, 129.0, 128.2, 127.9, 127.3, 127.3, 126.9, 123.5, 117.3, 116.1, 112.4, 110.2, 108.5, 101.8, 101.25, 61.2, 52.7, 44.4. **HRMS (ESI) m/z**:  $[\text{M}+\text{H}]^+$  calcd for  $\text{C}_{34}\text{H}_{31}\text{N}_2\text{O}_4^+$  531.2278; found: 531.2271.

### 1-benzyl-3-(4-(di(prop-2-yn-1-yl)amino)phenyl)-3-(6-hydroxybenzo[*d*][1,3]dioxol-5-yl)indolin-2-one (**3b**)

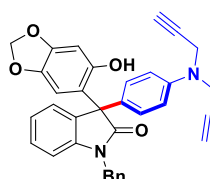

Flash column chromatography on a silica gel (petroleum ether: ethyl acetate, 8:1) afforded the product as a white solid (43.6 mg, 83% yield). M.p. 178 - 180 °C.

**<sup>1</sup>H NMR** (500 MHz, CDCl<sub>3</sub>) δ 9.26 (s, 1H), 7.36 – 7.26 (m, 5H), 7.19 (td, *J* = 7.6, 1.5 Hz, 1H), 7.12 – 7.05 (m, 2H), 7.04 – 7.00 (m, 2H), 6.86 – 6.82 (m, 3H), 6.57 (s, 1H), 6.50 (s, 1H), 5.91 (d, *J* = 1.4 Hz, 1H), 5.86 (d, *J* = 1.4 Hz, 1H), 5.08 (d, *J* = 15.7 Hz, 1H), 4.93 (d, *J* = 15.6 Hz, 1H), 4.07 (d, *J* = 2.4 Hz, 4H), 2.22 (t, *J* = 2.4 Hz, 2H). **<sup>13</sup>C NMR** (100 MHz, CDCl<sub>3</sub>) δ 181.4, 152.6, 148.3, 147.0, 141.1, 140.9, 135.2, 132.9, 130.84, 129.0, 128.4, 127.9, 127.3, 127.3, 127.0, 123.6, 117.0, 115.4, 110.3, 108.4, 101.9, 101.3, 79.3, 72.7, 61.2, 44.4, 40.2. **HRMS (ESI) m/z:** [M+Na]<sup>+</sup> calcd for C<sub>34</sub>H<sub>26</sub>N<sub>2</sub>NaO<sub>4</sub><sup>+</sup> 549.1784; found: 549.1777.

### 1-benzyl-3-(6-hydroxybenzo[*d*][1,3]dioxol-5-yl)-3-(4-(pyrrolidin-1-yl)phenyl)indolin-2-one (3c)

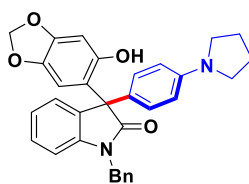

Flash column chromatography on a silica gel (petroleum ether: ethyl acetate, 8:1) afforded the product as a white solid (38.3 mg, 76% yield). M.p. 180 - 182 °C.

**<sup>1</sup>H NMR** (500 MHz, CDCl<sub>3</sub>) δ 9.22 (s, 1H), 7.33 – 7.22 (m, 5H), 7.16 (td, *J* = 7.6, 1.5 Hz, 1H), 7.09 (dd, *J* = 7.6, 1.4 Hz, 1H), 7.04 (td, *J* = 7.5, 1.0 Hz, 1H), 6.91 – 6.88 (m, 2H), 6.81 (d, *J* = 7.8 Hz, 1H), 6.55 – 6.52 (m, 3H), 6.49 (s, 1H), 5.88 (d, *J* = 1.5 Hz, 1H), 5.82 (d, *J* = 1.5 Hz, 1H), 5.04 (d, *J* = 15.8 Hz, 1H), 4.91 (d, *J* = 15.7 Hz, 1H), 3.43 (s, 3H). **<sup>13</sup>C NMR** (100 MHz, CDCl<sub>3</sub>) δ 181.7, 152.7, 148.1, 147.1, 141.1, 140.8, 135.3, 133.4, 129.0, 128.1, 127.9, 127.3, 127.3, 126.8, 126.3, 123.6, 117.4, 111.8, 110.2, 108.5, 101.8, 101.2, 61.2, 47.5, 44.3, 25.5. **HRMS (ESI) m/z:** [M+H]<sup>+</sup> calcd for C<sub>32</sub>H<sub>28</sub>N<sub>2</sub>O<sub>4</sub><sup>+</sup> 505.2121; found: 505.2123.

### 3-(4-aminophenyl)-1-benzyl-3-(6-hydroxybenzo[*d*][1,3]dioxol-5-yl)indolin-2-one (3d)

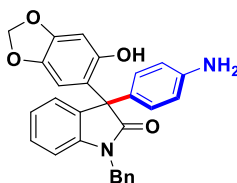

Flash column chromatography on a silica gel (petroleum ether: ethyl acetate, 5:1) afforded the product as a white solid (26.5 mg, 59% yield). M.p. 176 - 178 °C.

**<sup>1</sup>H NMR** (500 MHz, CDCl<sub>3</sub>) δ 9.22 (s, 1H), 7.33 – 7.22 (m, 5H), 7.16 (td, *J* = 7.6, 1.5 Hz, 1H), 7.09 (dd, *J* = 7.6, 1.4 Hz, 1H), 7.04 (td, *J* = 7.5, 1.0 Hz, 1H), 6.91 – 6.88 (m, 2H), 6.81 (d, *J* = 7.8 Hz, 1H), 6.55 – 6.52 (m, 3H), 6.49 (s, 1H), 5.88 (d, *J* = 1.5 Hz, 1H), 5.82 (d, *J* = 1.5 Hz, 1H), 5.04 (d, *J* = 15.8 Hz, 1H), 4.91 (d, *J* = 15.7 Hz, 1H), 3.43 (s, 2H). **<sup>13</sup>C NMR** (100 MHz, CDCl<sub>3</sub>) δ 181.5, 152.5, 148.2, 145.9, 141.2, 140.9, 135.3, 133.1, 129.9, 129.0, 128.3, 127.9, 127.5, 127.3, 126.8, 123.6, 117.4, 115.5, 110.3, 108.6, 101.9, 101.3, 61.2, 44.4. **HRMS (ESI) m/z:** [M+H]<sup>+</sup> calcd for C<sub>28</sub>H<sub>23</sub>N<sub>2</sub>O<sub>4</sub><sup>+</sup> 451.1652; found: 451.1646.

### 3-(4-amino-2,5-dimethoxyphenyl)-1-benzyl-3-(6-hydroxybenzo[d][1,3]dioxol-5-yl)indolin-2-one (3e)

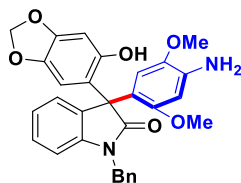

Flash column chromatography on a silica gel (petroleum ether: ethyl acetate, 6:1) afforded the product as a white solid (34.2 mg, 67% yield). M.p. 171 - 173 °C.

**<sup>1</sup>H NMR** (400 MHz, DMSO-*d*<sub>6</sub>) δ 9.66 (s, 1H), 7.41 – 7.31 (m, 4H), 7.30 – 7.25 (m, 2H), 7.11 – 7.03 (m, 2H), 6.98 (d, *J* = 7.4 Hz, 1H), 6.56 (s, 1H), 6.33 (s, 1H), 6.29 (s, 1H), 6.20 (s, 1H), 5.96 (s, 1H), 5.92 – 5.89 (m, 1H), 4.97 (s, 2H), 4.84 (s, 2H), 3.50 (s, 3H), 3.12 (s, 3H). **<sup>13</sup>C NMR** (100 MHz, DMSO-*d*<sub>6</sub>) δ 182.1, 152.9, 151.9, 148.2, 142.5, 140.7, 140.7, 139.1, 136.6, 132.7, 129.1, 128.5, 128.2, 128.0, 126.2, 123.1, 116.0, 114.0, 112.7, 110.1, 108.6, 101.7, 101.0, 100.2, 59.1, 56.4, 56.3, 43.9. **HRMS (ESI) m/z:** [M+K]<sup>+</sup> calcd for C<sub>30</sub>H<sub>26</sub>KN<sub>2</sub>O<sub>6</sub><sup>+</sup> 549.1422; found: 549.1420.

### 3-(4-amino-5-bromo-2-chlorophenyl)-1-benzyl-3-(6-hydroxybenzo[d][1,3]dioxol-5-yl)indolin-2-one (3f)

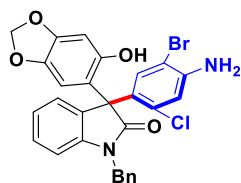

Flash column chromatography on a silica gel (petroleum ether: ethyl acetate, 5:1) afforded the product as a white solid (26.9 mg, 48% yield). M.p. 184 - 186 °C.

**<sup>1</sup>H NMR** (500 MHz, CDCl<sub>3</sub>) δ 9.54 (s, 1H), 7.30 – 7.22 (m, 6H), 7.12 (s, 1H), 7.08 (td, *J* = 7.5, 1.0 Hz, 1H), 6.90 – 6.85 (m, 2H), 6.63 (d, *J* = 3.6 Hz, 2H), 6.21 (s, 1H), 5.93 (d, *J* = 1.5 Hz, 1H), 5.87 (d, *J* = 1.5 Hz, 1H), 5.06 (d, *J* = 15.5 Hz, 1H), 4.78 (d, *J* = 15.5 Hz, 1H), 4.14 (s, 2H). **<sup>13</sup>C NMR** (100 MHz, CDCl<sub>3</sub>) δ 180.7, 153.4, 148.8, 144.8, 142.5, 141.4, 134.8, 134.1, 132.9, 130.7, 128.9, 128.8, 127.9, 127.9, 126.4, 126.0, 123.5, 116.9, 115.2, 110.1, 108.3, 107.5, 102.2, 101.5, 61.0, 44.9. **HRMS (ESI) m/z:** [M+H]<sup>+</sup> calcd for C<sub>28</sub>H<sub>21</sub>BrClN<sub>2</sub>O<sub>4</sub><sup>+</sup> 563.0367; found: 563.0370.

### 3-(4-amino-3-nitrophenyl)-1-benzyl-3-(6-hydroxybenzo[d][1,3]dioxol-5-yl)indolin-2-one (3g)

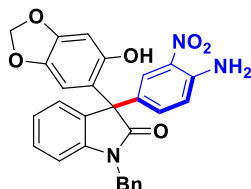

Flash column chromatography on a silica gel (petroleum ether: ethyl acetate, 5:1) afforded the product as a white solid (22.7 mg, 46% yield). M.p. 185 - 187 °C.

**<sup>1</sup>H NMR** (400 MHz, DMSO-*d*<sub>6</sub>) δ 9.45 (s, 1H), 7.74 (s, 1H), 7.59 (d, *J* = 8.7 Hz, 3H), 7.34 – 7.18 (m, 6H), 7.16 – 7.00 (m, 3H), 6.85 (d, *J* = 7.8 Hz, 1H), 6.37 (s, 1H), 6.29 (s, 1H), 5.91 (s, 2H), 4.90 (q, *J* = 16.0 Hz, 2H). **<sup>13</sup>C NMR** (100 MHz, DMSO-*d*<sub>6</sub>) δ 178.0, 150.4, 147.3, 146.3, 143.3, 139.9, 137.0, 131.9,

129.8, 128.9, 128.4, 127.7, 127.6, 126.5, 125.4, 124.8, 122.5, 120.4, 120.1, 109.7, 109.5, 101.4, 98.3, 79.6, 58.2, 43.5. **HRMS (ESI) m/z:**  $[M+H]^+$  calcd for  $C_{28}H_{22}N_3O_6^+$  496.1503; found: 496.1498.

### 1-benzyl-3-(6-hydroxybenzo[*d*][1,3]dioxol-5-yl)-3-(2,4,6-trimethoxyphenyl)indolin-2-one (3h)

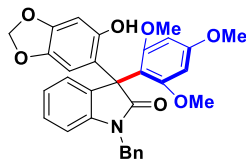

Flash column chromatography on a silica gel (petroleum ether: ethyl acetate, 9:1) afforded the product as a white solid (44.1 mg, 84% yield). M.p. 187 - 189 °C.

**<sup>1</sup>H NMR** (400 MHz,  $CDCl_3$ )  $\delta$  9.05 (s, 1H), 7.32 – 7.19 (m, 7H), 7.05 (td,  $J = 7.5, 1.0$  Hz, 1H), 6.83 (dt,  $J = 7.8, 0.8$  Hz, 1H), 6.51 (s, 1H), 6.19 (s, 1H), 6.15 (d,  $J = 2.4$  Hz, 1H), 6.06 (d,  $J = 2.4$  Hz, 1H), 5.86 (d,  $J = 1.4$  Hz, 1H), 5.81 (d,  $J = 1.4$  Hz, 1H), 5.00 (d,  $J = 15.8$  Hz, 1H), 4.85 (d,  $J = 15.8$  Hz, 1H), 3.75 (s, 3H), 3.40 (s, 3H), 3.32 (s, 3H). **<sup>13</sup>C NMR** (100 MHz,  $CDCl_3$ )  $\delta$  182.0, 160.6, 160.4, 158.3, 152.2, 146.8, 142.2, 140.8, 135.9, 131.9, 128.8, 128.3, 127.6, 127.6, 126.4, 123.2, 120.3, 109.5, 108.8, 107.3, 101.0, 100.9, 92.8, 92.6, 57.0, 56.2, 56.1, 55.2, 44.2. **HRMS (ESI) m/z:**  $[M+H]^+$  calcd for  $C_{31}H_{28}NO_7^+$  526.1860; found: 526.1858.

### 1-benzyl-3,3-bis(6-hydroxybenzo[*d*][1,3]dioxol-5-yl)indolin-2-one (3i)

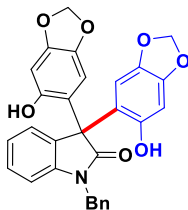

Flash column chromatography on a silica gel (petroleum ether: ethyl acetate, 5:1) afforded the product as a white solid (43 mg, 87% yield). M.p. 185 - 187 °C.

**<sup>1</sup>H NMR** (400 MHz,  $DMSO-d_6$ )  $\delta$  9.82 (s, 1H), 9.50 (s, 1H), 7.39 – 7.23 (m, 6H), 7.08 (td,  $J = 7.5, 1.0$  Hz, 1H), 7.00 (dd,  $J = 7.5, 1.3$  Hz, 1H), 6.95 (d,  $J = 7.8$  Hz, 1H), 6.58 (s, 1H), 6.36 (s, 1H), 6.31 (s, 1H), 6.18 (s, 1H), 5.97 (s, 1H), 5.92 (d,  $J = 3.6$  Hz, 3H), 5.05 (d,  $J = 15.9$  Hz, 1H), 4.90 (d,  $J = 15.9$  Hz, 1H). **<sup>13</sup>C NMR** (100 MHz,  $DMSO-d_6$ )  $\delta$  181.7, 152.9, 149.8, 148.5, 147.5, 142.6, 141.0, 140.3, 136.4, 131.9, 129.1, 128.7, 127.9, 127.8, 126.2, 123.3, 117.2, 115.9, 110.3, 108.4, 101.8, 101.4, 98.3, 59.3, 44.0. **HRMS (ESI) m/z:**  $[M+Na]^+$  calcd for  $C_{29}H_{21}NNaO_7^+$  518.1210; found: 518.1204.

### 1-benzyl-3-(6-hydroxybenzo[*d*][1,3]dioxol-5-yl)-3-(1*H*-indol-3-yl)indolin-2-one (3j)

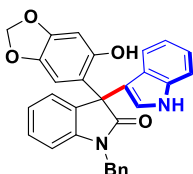

Flash column chromatography on a silica gel (petroleum ether: ethyl acetate, 5:1) afforded the product as a white solid (40.7 mg, 86% yield). M.p. 162 - 164 °C.

**<sup>1</sup>H NMR** (400 MHz, DMSO-*d*<sub>6</sub>) δ 11.04 (d, *J* = 2.6 Hz, 1H), 9.38 (s, 1H), 7.69 (d, *J* = 8.1 Hz, 1H), 7.42 (d, *J* = 8.2 Hz, 1H), 7.34 – 7.21 (m, 5H), 7.18 (td, *J* = 7.6, 1.6 Hz, 1H), 7.12 – 7.08 (m, 1H), 7.05 – 6.91 (m, 3H), 6.78 (d, *J* = 7.8 Hz, 1H), 6.54 (d, *J* = 2.6 Hz, 1H), 6.41 (s, 2H), 5.88 (dd, *J* = 19.1, 1.1 Hz, 2H), 4.93 (d, *J* = 16.0 Hz, 1H), 4.77 (d, *J* = 16.1 Hz, 1H). **<sup>13</sup>C NMR** (100 MHz, DMSO-*d*<sub>6</sub>) δ 177.8, 149.9, 147.0, 143.3, 139.6, 137.9, 137.3, 133.5, 128.9, 127.9, 127.6, 127.5, 126.1, 125.4, 124.3, 123.7, 122.0, 121.8, 119.3, 118.8, 114.0, 112.2, 110.1, 109.0, 101.2, 98.2, 55.5, 43.4. **HRMS (ESI) m/z:** [M+H]<sup>+</sup> calcd for C<sub>30</sub>H<sub>23</sub>N<sub>2</sub>O<sub>4</sub><sup>+</sup> 475.1652; found: 475.1653.

**1-benzyl-3-(6-hydroxybenzo[*d*][1,3]dioxol-5-yl)-3-(1*H*-pyrrol-2-yl)indolin-2-one (3k)**

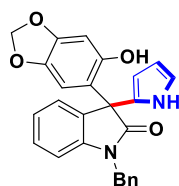

Flash column chromatography on a silica gel (petroleum ether: ethyl acetate, 7:1) afforded the product as a white solid (34.7 mg, 82% yield). M.p. 153 - 155 °C.

**<sup>1</sup>H NMR** (500 MHz, CDCl<sub>3</sub>) δ 8.88 (s, 1H), 7.24 – 7.14 (m, 7H), 7.07 – 6.99 (m, 2H), 6.77 (td, *J* = 2.8, 1.4 Hz, 1H), 6.72 (d, *J* = 7.8 Hz, 1H), 6.33 (d, *J* = 1.1 Hz, 1H), 6.28 (t, *J* = 2.8 Hz, 1H), 6.10 (q, *J* = 2.9 Hz, 1H), 5.90 – 5.89 (m, 1H), 5.81 (d, *J* = 1.6 Hz, 2H), 4.87 (t, *J* = 2.1 Hz, 2H). **<sup>13</sup>C NMR** (100 MHz, CDCl<sub>3</sub>) δ 179.1, 149.6, 147.8, 142.1, 141.4, 135.5, 131.7, 128.8, 128.3, 127.6, 127.5, 127.2, 125.2, 123.1, 119.5, 118.7, 109.8, 109.0, 108.9, 108.1, 101.3, 100.0, 55.8, 44.2. **HRMS (ESI) m/z:** [M+H]<sup>+</sup> calcd for C<sub>26</sub>H<sub>21</sub>N<sub>2</sub>O<sub>4</sub><sup>+</sup> 425.1495; found: 425.1497.

**1-benzyl-3-(6-hydroxybenzo[*d*][1,3]dioxol-5-yl)-3-(5-methylfuran-2-yl)indolin-2-one (3l)**

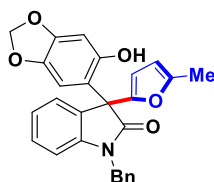

Flash column chromatography on a silica gel (petroleum ether: ethyl acetate, 8:1) afforded the product as a white solid (35.5 mg, 81% yield). M.p. 149 - 151 °C.

**<sup>1</sup>H NMR** (400 MHz, CDCl<sub>3</sub>) δ 9.16 (s, 1H), 7.32 – 7.19 (m, 7H), 7.12 (td, *J* = 7.5, 1.1 Hz, 1H), 6.80 – 6.77 (m, 1H), 6.56 (s, 1H), 6.50 (s, 1H), 6.11 (d, *J* = 3.1 Hz, 1H), 5.89 (q, *J* = 1.2 Hz, 2H), 5.84 (d, *J* = 1.5 Hz, 1H), 5.10 (d, *J* = 15.9 Hz, 1H), 4.86 (d, *J* = 15.9 Hz, 1H), 2.20 (d, *J* = 1.1 Hz, 3H). **<sup>13</sup>C NMR** (100 MHz, CDCl<sub>3</sub>) δ 178.8, 152.7, 152.6, 148.8, 148.3, 141.7, 141.0, 134.9, 130.0, 128.9, 128.8, 127.8, 127.0, 126.8, 123.5, 114.4, 110.4, 109.1, 108.1, 106.4, 101.6, 101.3, 57.4, 44.3, 13.7. **HRMS (ESI) m/z:** [M+H]<sup>+</sup> calcd for C<sub>27</sub>H<sub>22</sub>NO<sub>5</sub><sup>+</sup> 440.1492; found: 440.1491.

**1-benzyl-3-(6-hydroxybenzo[*d*][1,3]dioxol-5-yl)-3-(pyrrolidin-1-yl)indolin-2-one (4a)**

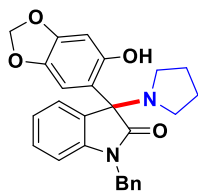

Flash column chromatography on a silica gel (petroleum ether: ethyl acetate, 20:1) afforded the product as a white solid (32.5 mg, 76% yield). M.p. 124 - 126 °C.

**<sup>1</sup>H NMR** (400 MHz, CDCl<sub>3</sub>) δ 12.03 (s, 1H), 7.60 (dd, *J* = 7.5, 1.2 Hz, 1H), 7.36 – 7.25 (m, 5H), 7.21 (td, *J* = 7.8, 1.2 Hz, 1H), 7.03 (td, *J* = 7.6, 1.0 Hz, 1H), 6.77 (dd, *J* = 7.9, 1.0 Hz, 1H), 6.50 (s, 1H), 6.15 (s, 1H), 5.80 – 5.78 (m, 2H), 5.00 (d, *J* = 15.5 Hz, 1H), 4.87 (d, *J* = 15.5 Hz, 1H), 2.90 (dt, *J* = 8.2, 5.6 Hz, 2H), 2.73 (s, 2H), 1.79 (q, *J* = 4.7, 2.8 Hz, 4H). **<sup>13</sup>C NMR** (100 MHz, CDCl<sub>3</sub>) δ 174.5, 154.7, 148.1, 142.2, 140.1, 135.7, 129.5, 128.9, 128.8, 127.8, 127.4, 125.5, 123.3, 113.9, 109.6, 106.5, 101.0, 99.6, 71.7, 47.0, 43.9, 23.6. **HRMS (ESI) m/z:** [M+H]<sup>+</sup> calcd for C<sub>26</sub>H<sub>25</sub>N<sub>2</sub>O<sub>4</sub><sup>+</sup> 429.1808; found: 429.1806.

### 1-benzyl-3-(6-hydroxybenzo[*d*][1,3]dioxol-5-yl)-3-(piperidin-1-yl)indolin-2-one (4b)

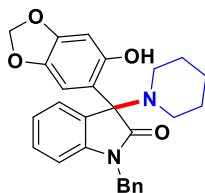

Flash column chromatography on a silica gel (petroleum ether: ethyl acetate, 20:1) afforded the product as a white solid (28.2mg, 64% yield). M.p. 129 - 131 °C.

**<sup>1</sup>H NMR** (400 MHz, CDCl<sub>3</sub>) δ 11.85 (s, 1H), 7.56 (dd, *J* = 7.5, 1.3 Hz, 1H), 7.34 – 7.25 (m, 5H), 7.21 (td, *J* = 7.8, 1.3 Hz, 1H), 7.04 (td, *J* = 7.6, 1.1 Hz, 1H), 6.75 (dd, *J* = 7.9, 1.0 Hz, 1H), 6.50 (s, 1H), 6.09 (s, 1H), 5.81 – 5.77 (m, 2H), 4.97 (d, *J* = 15.6 Hz, 1H), 4.88 (d, *J* = 15.6 Hz, 1H), 3.04 (d, *J* = 32.5 Hz, 2H), 2.42 (d, *J* = 67.4 Hz, 2H), 1.65 (s, 6H). **<sup>13</sup>C NMR** (100 MHz, CDCl<sub>3</sub>) δ 174.2, 154.6, 148.3, 142.4, 140.1, 135.6, 129.5, 128.9, 128.1, 127.8, 127.4, 125.5, 123.3, 113.1, 109.6, 106.9, 101.0, 99.7, 75.2, 48.1, 43.9, 26.4, 24.2. **HRMS (ESI) m/z:** [M+H]<sup>+</sup> calcd for C<sub>27</sub>H<sub>27</sub>N<sub>2</sub>O<sub>4</sub><sup>+</sup> 443.1965; found: 443.1962.

### 1-benzyl-3-(6-hydroxybenzo[*d*][1,3]dioxol-5-yl)-3-morpholinoindolin-2-one (4c)

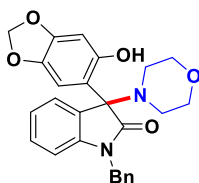

Flash column chromatography on a silica gel (petroleum ether: ethyl acetate, 15:1) afforded the product as a white solid (26.1 mg, 59% yield). M.p. 126 - 128 °C.

**<sup>1</sup>H NMR** (400 MHz, CDCl<sub>3</sub>) δ 11.28 (s, 1H), 7.57 (dd, *J* = 7.5, 1.2 Hz, 1H), 7.35 – 7.20 (m, 6H), 7.06 (td, *J* = 7.6, 1.0 Hz, 1H), 6.80 (dd, *J* = 8.0, 1.0 Hz, 1H), 6.49 (s, 1H), 6.13 (s, 1H), 5.81 – 5.78 (m, 2H), 4.99 (d, *J* = 15.5 Hz, 1H), 4.87 (d, *J* = 15.6 Hz, 1H), 3.75 (s, 4H), 2.80 (s, 4H). **<sup>13</sup>C NMR** (100 MHz, CDCl<sub>3</sub>) δ 173.8, 154.0, 148.7, 142.5, 140.5, 135.5, 129.8, 129.0, 127.9, 127.4, 127.5, 125.6, 123.5, 112.1, 109.8, 107.1, 101.2, 99.7, 74.7, 67.2, 47.3, 44.0. **HRMS (ESI) m/z:** [M+H]<sup>+</sup> calcd for C<sub>26</sub>H<sub>25</sub>N<sub>2</sub>O<sub>5</sub><sup>+</sup> 445.1758; found: 445.1760.

**1-benzyl-3-(6-hydroxybenzo[*d*][1,3]dioxol-5-yl)-3-thiomorpholinoindolin-2-one (4d)**

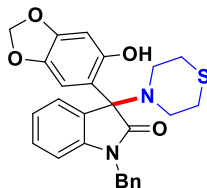

Flash column chromatography on a silica gel (petroleum ether: ethyl acetate, 15:1) afforded the product as a white solid (28.0 mg, 61% yield). M.p. 123 - 125 °C.

**<sup>1</sup>H NMR** (400 MHz, CDCl<sub>3</sub>) δ 11.03 (s, 1H), 7.55 (dd, *J* = 7.6, 1.2 Hz, 1H), 7.35 – 7.27 (m, 5H), 7.26 – 7.21 (m, 1H), 7.06 (td, *J* = 7.6, 1.0 Hz, 1H), 6.78 (dd, *J* = 7.9, 1.0 Hz, 1H), 6.50 (s, 1H), 6.08 (s, 1H), 5.83 – 5.80 (m, 2H), 4.97 (d, *J* = 15.6 Hz, 1H), 4.88 (d, *J* = 15.5 Hz, 1H), 3.29 – 2.51 (m, 8H). **<sup>13</sup>C NMR** (100 MHz, CDCl<sub>3</sub>) δ 174.0, 154.0, 148.6, 142.4, 140.5, 135.4, 129.8, 128.9, 127.9, 127.4, 125.4, 123.5, 112.4, 109.9, 107.0, 101.1, 99.8, 75.6, 49.7, 44.0, 28.5. **HRMS (ESI) m/z:** [M+H]<sup>+</sup> calcd for C<sub>26</sub>H<sub>25</sub>N<sub>2</sub>O<sub>4</sub>S<sup>+</sup> 461.1529; found: 461.1526.

**3-(azepan-1-yl)-1-benzyl-3-(6-hydroxybenzo[*d*][1,3]dioxol-5-yl)indolin-2-one (4e)**

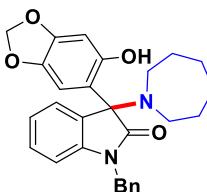

Flash column chromatography on a silica gel (petroleum ether: ethyl acetate, 15:1) afforded the product as a white solid (27.8 mg, 61% yield). M.p. 132 - 134 °C.

**<sup>1</sup>H NMR** (400 MHz, CDCl<sub>3</sub>) δ 11.70 (s, 1H), 7.64 (d, *J* = 7.5 Hz, 1H), 7.33 – 7.23 (m, 5H), 7.20 (td, *J* = 7.8, 1.2 Hz, 1H), 7.05 – 7.00 (m, 1H), 6.75 (d, *J* = 7.6 Hz, 1H), 6.51 (s, 1H), 6.11 (s, 1H), 5.80 – 5.76 (m, 2H), 4.98 (d, *J* = 15.6 Hz, 1H), 4.85 (d, *J* = 15.6 Hz, 1H), 3.12 (d, *J* = 54.9 Hz, 2H), 2.58 (d, *J* = 41.4 Hz, 2H), 1.75 – 1.47 (m, 8H). **<sup>13</sup>C NMR** (100 MHz, CDCl<sub>3</sub>) δ 174.7, 154.2, 148.4, 142.2, 140.1, 135.7, 129.4, 128.9, 127.8, 127.4, 125.0, 123.4, 114.5, 109.6, 106.8, 101.0, 99.8, 75.7, 51.5, 51.1, 43.9, 28.8, 28.5, 26.1. **HRMS (ESI) m/z:** [M+H]<sup>+</sup> calcd for C<sub>28</sub>H<sub>29</sub>N<sub>2</sub>O<sub>4</sub><sup>+</sup> 457.2121; found: 457.2123.

**1-benzyl-3-(6-hydroxybenzo[*d*][1,3]dioxol-5-yl)-3-(4-phenylpiperazin-1-yl)indolin-2-one (4f)**

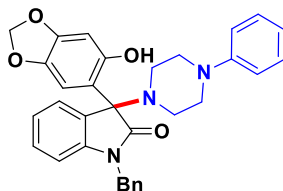

Flash column chromatography on a silica gel (petroleum ether: ethyl acetate, 15:1) afforded the product as a white solid (33.2 mg, 64% yield). M.p. 114 - 116 °C.

**<sup>1</sup>H NMR** (400 MHz, CDCl<sub>3</sub>) δ 11.31 (s, 1H), 7.59 (dd, *J* = 7.6, 1.3 Hz, 1H), 7.36 – 7.22 (m, 8H), 7.07 (td, *J* = 7.6, 1.0 Hz, 1H), 6.90 – 6.84 (m, 3H), 6.80 (dd, *J* = 8.0, 1.0 Hz, 1H), 6.52 (s, 1H), 6.14 (s, 1H), 5.84 – 5.80 (m, 2H), 5.01 (d, *J* = 15.6 Hz, 1H), 4.88 (d, *J* = 15.6 Hz, 1H), 3.54 (s, 2H), 2.97 (s, 6H). **<sup>13</sup>C NMR**

**NMR** (100 MHz, CDCl<sub>3</sub>)  $\delta$  173.9, 154.2, 150.8, 148.6, 142.5, 140.4, 135.5, 129.8, 129.2, 129.0, 127.9, 127.5, 125.7, 123.5, 120.3, 116.4, 112.4, 109.8, 107.1, 101.1, 99.8, 74.6, 49.8, 46.9, 44.0. **HRMS (ESI)**  $m/z$ : [M+H]<sup>+</sup> calcd for C<sub>32</sub>H<sub>30</sub>N<sub>3</sub>O<sub>4</sub><sup>+</sup> 520.2230; found: 520.2228.

**1-benzyl-3-(6-hydroxybenzo[*d*][1,3]dioxol-5-yl)-3-(octahydro-2*H*-isoindol-2-yl)indolin-2-one (4g)**

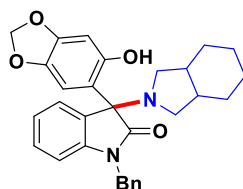

Flash column chromatography on a silica gel (petroleum ether: ethyl acetate, 20:1) afforded the product as a white solid (31.8 mg, 66% yield). M.p. 117 - 119 °C.

**<sup>1</sup>H NMR** (400 MHz, CDCl<sub>3</sub>)  $\delta$  12.25 (s, 1H), 7.70 (dd, *J* = 7.6, 1.2 Hz, 1H), 7.40 – 7.24 (m, 5H), 7.19 (td, *J* = 7.7, 1.3 Hz, 1H), 7.02 (td, *J* = 7.6, 1.1 Hz, 1H), 6.78 (dd, *J* = 7.9, 0.9 Hz, 1H), 6.50 (s, 1H), 6.21 (s, 1H), 5.79 (dd, *J* = 8.4, 1.5 Hz, 2H), 5.04 (d, *J* = 15.5 Hz, 1H), 4.87 (d, *J* = 15.5 Hz, 1H), 3.38 – 2.61 (m, 4H), 2.21 – 2.06 (m, 2H), 1.62 – 1.20 (m, 8H). **<sup>13</sup>C NMR** (100 MHz, CDCl<sub>3</sub>)  $\delta$  175.1, 154.4, 148.3, 141.8, 140.1, 135.8, 130.1, 129.3, 128.9, 127.9, 127.6, 125.1, 123.5, 114.6, 109.5, 106.6, 101.0, 99.5, 71.7, 43.9, 37.3, 37.1, 26.4, 23.1. **HRMS (ESI)**  $m/z$ : [M+H]<sup>+</sup> calcd for C<sub>30</sub>H<sub>31</sub>N<sub>2</sub>O<sub>4</sub><sup>+</sup> 483.2278; found: 483.2281.

**1-benzyl-3-(3,4-dihydroisoquinolin-2(1*H*)-yl)-3-(6-hydroxybenzo[*d*][1,3]dioxol-5-yl)indolin-2-one (4h)**

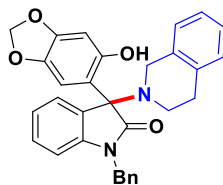

Flash column chromatography on a silica gel (petroleum ether: ethyl acetate, 20:1) afforded the product as a white solid (29.8 mg, 61% yield). M.p. 121 - 123 °C.

**<sup>1</sup>H NMR** (400 MHz, CDCl<sub>3</sub>)  $\delta$  11.40 (s, 1H), 7.60 (d, *J* = 67.5 Hz, 1H), 7.39 – 7.24 (m, 6H), 7.17 – 6.97 (m, 4H), 6.83 (dd, *J* = 12.3, 7.6 Hz, 2H), 6.51 (s, 1H), 6.20 (d, *J* = 81.3 Hz, 1H), 5.92 – 5.71 (m, 2H), 5.04 (d, *J* = 15.4 Hz, 1H), 4.90 (s, 1H), 4.12 - 3.62 (m, 2H), 3.57 – 2.58 (m, 4H). **<sup>13</sup>C NMR** (101 MHz, CDCl<sub>3</sub>)  $\delta$  174.5, 154.9, 148.6, 140.4, 135.7, 133.5, 129.8, 128.9, 128.8, 127.9, 127.6, 126.7, 126.6, 125.9, 123.5, 109.8, 107.0, 101.1, 99.9, 74.6, 49.4, 45.1, 44.0, 29.4. **HRMS (ESI)**  $m/z$ : [M+H]<sup>+</sup> calcd for C<sub>31</sub>H<sub>27</sub>N<sub>2</sub>O<sub>4</sub><sup>+</sup> 491.1965; found: 491.1968.

**1-benzyl-3-(dimethylamino)-3-(6-hydroxybenzo[*d*][1,3]dioxol-5-yl)indolin-2-one (4i)**

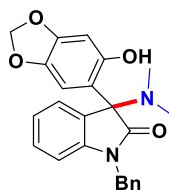



Flash column chromatography on a silica gel (petroleum ether: ethyl acetate, 20:1) afforded the product as a white solid (25.7 mg, 64% yield). M.p. 115 - 117 °C.

**<sup>1</sup>H NMR** (500 MHz, CDCl<sub>3</sub>) δ 11.73 (s, 1H), 7.56 (dd, *J* = 7.6, 1.3 Hz, 1H), 7.34 – 7.26 (m, 5H), 7.23 (td, *J* = 7.8, 1.2 Hz, 1H), 7.05 (td, *J* = 7.6, 1.0 Hz, 1H), 6.78 (dd, *J* = 7.9, 1.0 Hz, 1H), 6.51 (s, 1H), 6.10 (s, 1H), 5.82 – 5.79 (m, 2H), 5.01 (d, *J* = 15.5 Hz, 1H), 4.86 (d, *J* = 15.6 Hz, 1H), 2.43 (s, 6H). **<sup>13</sup>C NMR** (100 MHz, CDCl<sub>3</sub>) δ 174.0, 154.5, 148.4, 142.4, 140.1, 135.6, 129.6, 128.9, 127.8, 127.4, 125.5, 123.3, 113.4, 109.6, 106.8, 101.0, 99.7, 74.5, 43.9, 39.1. **HRMS (ESI) m/z:** [M+H]<sup>+</sup> calcd for C<sub>24</sub>H<sub>23</sub>N<sub>2</sub>O<sub>4</sub><sup>+</sup> 403.1652; found: 403.1649.

### 1-benzyl-3-(benzyl(methyl)amino)-3-(6-hydroxybenzo[*d*][1,3]dioxol-5-yl)indolin-2-one (4j)

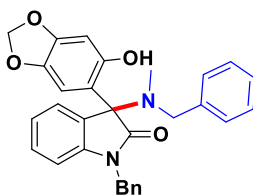

Flash column chromatography on a silica gel (petroleum ether: ethyl acetate, 15:1) afforded the product as a white solid (25.8 mg, 54% yield). M.p. 113 - 115 °C.

**<sup>1</sup>H NMR** (400 MHz, CDCl<sub>3</sub>) δ 11.55 (s, 1H), 7.72 (s, 1H), 7.37 – 7.22 (m, 11H), 7.08 (td, *J* = 7.6, 1.0 Hz, 1H), 6.80 (dd, *J* = 7.9, 0.9 Hz, 1H), 6.54 (s, 1H), 6.21 (s, 1H), 5.84 – 5.78 (m, 2H), 5.03 (d, *J* = 15.6 Hz, 1H), 4.92 (d, *J* = 15.6 Hz, 1H), 4.22 – 3.10 (m, 2H), 2.32 (s, 3H). **<sup>13</sup>C NMR** (100 MHz, CDCl<sub>3</sub>) δ 174.2, 154.0, 148.6, 142.3, 140.4, 137.2, 135.6, 129.7, 129.4, 129.0, 128.7, 127.9, 127.7, 127.4, 125.4, 123.5, 113.6, 109.9, 106.9, 101.1, 99.8, 75.0, 55.9, 44.0, 35.3. **HRMS (ESI) m/z:** [M+H]<sup>+</sup> calcd for C<sub>30</sub>H<sub>27</sub>N<sub>2</sub>O<sub>4</sub><sup>+</sup> 479.1965; found: 479.1967.

### 3-(6-hydroxybenzo[*d*][1,3]dioxol-5-yl)-3-(pyrrolidin-1-yl)indolin-2-one (4k)

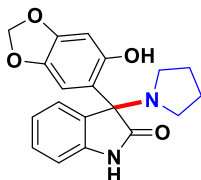

Flash column chromatography on a silica gel (petroleum ether: ethyl acetate, 10:1) afforded the product as a white solid (22.6mg, 67% yield). M.p. 130 - 132 °C.

**<sup>1</sup>H NMR** (400 MHz, CDCl<sub>3</sub>) δ 12.10 (s, 1H), 9.15 (s, 1H), 7.52 (dd, *J* = 7.6, 1.2 Hz, 1H), 7.29 – 7.24 (m, 1H), 7.06 (td, *J* = 7.6, 1.1 Hz, 1H), 6.95 (dd, *J* = 8.0, 1.0 Hz, 1H), 6.50 (s, 1H), 6.18 (s, 1H), 5.82 – 5.78 (m, 2H), 2.85 (s, 4H), 1.81 (d, *J* = 6.2 Hz, 4H). **<sup>13</sup>C NMR** (100 MHz, CDCl<sub>3</sub>) δ 177.1, 154.8, 148.4, 140.5, 140.0, 129.6, 128.6, 125.9, 123.2, 113.3, 110.7, 106.7, 101.0, 99.5, 72.4, 46.9, 23.5. **HRMS (ESI) m/z:** [M+H]<sup>+</sup> calcd for C<sub>19</sub>H<sub>19</sub>N<sub>2</sub>O<sub>4</sub><sup>+</sup> 339.1339; found: 339.1341.

### 1-benzyl-3-(1-hydroxynaphthalen-2-yl)-3-(pyrrolidin-1-yl)indolin-2-one (4l)

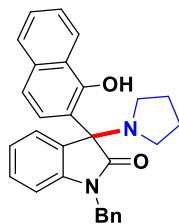

Flash column chromatography on a silica gel (petroleum ether: ethyl acetate, 15:1) afforded the product as a white solid (27.3mg, 63% yield). M.p. 141 - 143 °C.

**<sup>1</sup>H NMR** (400 MHz, CDCl<sub>3</sub>) δ 12.83 (s, 1H), 8.41 – 8.38 (m, 1H), 7.69 – 7.65 (m, 1H), 7.60 (dd, *J* = 7.6, 1.2 Hz, 1H), 7.43 (tt, *J* = 6.8, 5.1 Hz, 2H), 7.33 – 7.21 (m, 5H), 7.20 – 7.11 (m, 2H), 7.00 (td, *J* = 7.6, 1.1 Hz, 1H), 6.77 – 6.67 (m, 2H), 4.94 (s, 2H), 3.11 (d, *J* = 43.4 Hz, 2H), 2.49 (d, *J* = 85.2 Hz, 2H), 1.68 – 1.67 (m, 4H). **<sup>13</sup>C NMR** (100 MHz, CDCl<sub>3</sub>) δ 174.3, 155.4, 142.6, 135.7, 134.3, 129.5, 128.2, 128.4, 127.8, 127.4, 127.2, 126.7, 125.6, 125.6, 124.9, 124.7, 123.3, 122.9, 118.4, 114.9, 109.7, 75.7, 48.3, 43.9, 26.6, 24.3. **HRMS (ESI) m/z:** [M+H]<sup>+</sup> calcd for C<sub>29</sub>H<sub>27</sub>N<sub>2</sub>O<sub>2</sub><sup>+</sup> 435.2067; found: 435.2064.

### 1-benzyl-3-(6-hydroxybenzo[*d*][1,3]dioxol-5-yl)-3-methoxyindolin-2-one (5a)

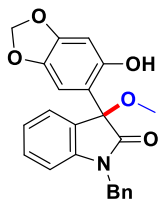

Flash column chromatography on a silica gel (petroleum ether: ethyl acetate, 10:1) afforded the product as a white solid (28.0 mg, 72% yield). M.p. 165 - 167 °C.

**<sup>1</sup>H NMR** (400 MHz, CDCl<sub>3</sub>) δ 8.94 (s, 1H), 7.42 (dd, *J* = 7.3, 1.3 Hz, 1H), 7.34 – 7.25 (m, 6H), 7.17 (td, *J* = 7.5, 1.0 Hz, 1H), 6.81 (dd, *J* = 7.8, 0.9 Hz, 1H), 6.56 (s, 1H), 6.09 (s, 1H), 5.86 – 5.83 (m, 2H), 4.95 (d, *J* = 15.6 Hz, 1H), 4.86 (d, *J* = 15.6 Hz, 1H), 3.26 (s, 3H). **<sup>13</sup>C NMR** (100 MHz, +9\* CDCl<sub>3</sub>) δ 176.1, 153.7, 149.1, 143.3, 140.6, 135.1, 130.7, 129.0, 128.0, 127.3, 126.4, 126.0, 123.7, 112.9, 110.3, 107.2, 101.3, 100.6, 86.0, 53.3, 44.1. **HRMS (ESI) m/z:** [M+H]<sup>+</sup> calcd for C<sub>23</sub>H<sub>20</sub>NO<sub>5</sub><sup>+</sup> 390.1336; found: 390.1337.

### 1-benzyl-3-ethoxy-3-(6-hydroxybenzo[*d*][1,3]dioxol-5-yl)indolin-2-one (5b)

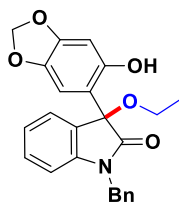

Flash column chromatography on a silica gel (petroleum ether: ethyl acetate, 10:1) afforded the product as a white solid (28.6 mg, 71% yield). M.p. 161 - 163 °C.

**<sup>1</sup>H NMR** (400 MHz, CDCl<sub>3</sub>) δ 8.98 (s, 1H), 7.42 (dd, *J* = 7.4, 1.3 Hz, 1H), 7.34 – 7.25 (m, 6H), 7.15 (td, *J* = 7.5, 1.0 Hz, 1H), 6.79 (dt, *J* = 8.0, 0.8 Hz, 1H), 6.55 (s, 1H), 6.04 (s, 1H), 5.83 (q, *J* = 1.4 Hz, 2H), 4.95 – 4.85 (m, 2H), 3.51 – 3.44 (m, 1H), 3.36 – 3.29 (m, 1H), 1.26 (t, *J* = 7.0 Hz, 3H). **<sup>13</sup>C NMR** (100 MHz, CDCl<sub>3</sub>) δ 176.1, 153.7, 149.0, 143.1, 140.5, 135.2, 130.5, 129.0, 127.9, 127.3, 126.8, 126.2, 123.7, 113.1, 110.1, 106.9, 101.2, 100.5, 85.5, 61.6, 44.1, 15.3. **HRMS (ESI) m/z:** [M+H]<sup>+</sup> calcd for C<sub>24</sub>H<sub>22</sub>NO<sub>5</sub><sup>+</sup> 404.192; found: 404.1495.

**1-benzyl-3-(2-bromoethoxy)-3-(6-hydroxybenzo[*d*][1,3]dioxol-5-yl)indolin-2-one (5c)**

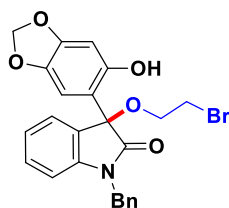

Flash column chromatography on a silica gel (petroleum ether: ethyl acetate, 8:1) afforded the product as a white solid (27.9mg, 58% yield). M.p. 151 - 153 °C.

**<sup>1</sup>H NMR** (400 MHz, CDCl<sub>3</sub>) δ 8.82 (s, 1H), 7.47 (dd, *J* = 7.4, 1.3 Hz, 1H), 7.36 – 7.25 (m, 6H), 7.17 (td, *J* = 7.5, 1.0 Hz, 1H), 6.81 (d, *J* = 7.9 Hz, 1H), 6.57 (s, 1H), 6.13 (s, 1H), 5.84 (q, *J* = 1.4 Hz, 2H), 4.96 – 4.85 (m, 2H), 3.73 – 3.66 (m, 1H), 3.59 – 3.53 (m, 1H), 3.48 (t, *J* = 5.7 Hz, 2H). **<sup>13</sup>C NMR** (100 MHz, CDCl<sub>3</sub>) δ 175.7, 153.6, 149.2, 143.0, 140.7, 135.0, 130.9, 129.0, 128.0, 127.3, 126.5, 126.0, 123.9, 112.7, 110.4, 107.10 101.4, 100.8, 85.5, 65.6, 44.2, 29.7. **HRMS (ESI) m/z:** [M+H]<sup>+</sup> calcd for C<sub>24</sub>H<sub>21</sub>BrNO<sub>5</sub><sup>+</sup> 482.0597; found: 482.0596.

**1-benzyl-3-(6-hydroxybenzo[*d*][1,3]dioxol-5-yl)-3-(prop-2-yn-1-yloxy)indolin-2-one (5d)**

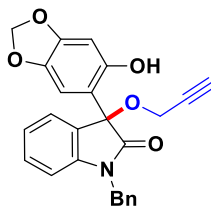

Flash column chromatography on a silica gel (petroleum ether: ethyl acetate, 8:1) afforded the product as a white solid (26.4 mg, 64% yield). M.p. 157 - 159 °C.

**<sup>1</sup>H NMR** (400 MHz, CDCl<sub>3</sub>) δ 8.85 (s, 1H), 7.47 (dd, *J* = 7.4, 1.3 Hz, 1H), 7.35 – 7.27 (m, 6H), 7.17 (td, *J* = 7.5, 1.0 Hz, 1H), 6.81 (d, *J* = 7.9 Hz, 1H), 6.58 (s, 1H), 6.15 (s, 1H), 5.86 – 5.83 (m, 2H), 4.89 (s, 2H), 4.16 – 4.01 (m, 2H), 2.38 (t, *J* = 2.5 Hz, 1H). **<sup>13</sup>C NMR** (100 MHz, CDCl<sub>3</sub>) δ 175.8, 153.8, 149.3, 143.2, 140.7, 134.9, 131.0, 129.0, 128.0, 127.3, 126.8, 125.5, 123.7, 112.4, 110.4, 107.4, 101.4, 100.9, 85.3, 78.5, 75.6, 54.0, 44.2, 29.7. **HRMS (ESI) m/z:** [M+H]<sup>+</sup> calcd for C<sub>25</sub>H<sub>20</sub>NO<sub>5</sub><sup>+</sup> 414.1336; found: 414.1338.

**1-benzyl-3-(but-3-yn-1-yloxy)-3-(6-hydroxybenzo[*d*][1,3]dioxol-5-yl)indolin-2-one (5e)**

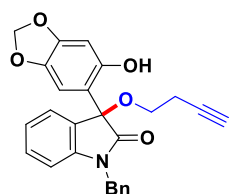

Flash column chromatography on a silica gel (petroleum ether: ethyl acetate, 8:1) afforded the product as a white solid (26.9 mg, 63% yield). M.p. 149 - 151 °C.

**<sup>1</sup>H NMR** (400 MHz, CDCl<sub>3</sub>) δ 8.82 (s, 1H), 7.45 (dd, *J* = 7.5, 1.3 Hz, 1H), 7.34 – 7.24 (m, 6H), 7.15 (td, *J* = 7.6, 1.0 Hz, 1H), 6.80 (d, *J* = 7.9 Hz, 1H), 6.56 (s, 1H), 6.09 (s, 1H), 5.83 (s, 2H), 4.90 (s, 2H), 3.51 (dt, *J* = 8.1, 6.7 Hz, 1H), 3.37 (dt, *J* = 8.2, 6.7 Hz, 1H), 2.52 (td, *J* = 6.7, 2.6 Hz, 2H), 2.05 (t, *J* = 2.7 Hz, 1H). **<sup>13</sup>C NMR** (100 MHz, CDCl<sub>3</sub>) δ 175.7, 153.6, 149.1, 143.0, 140.6, 135.1, 130.8, 129.0, 128.7, 128.0, 127.3, 126.3, 123.8, 113.0, 110.2, 106.9, 101.3, 100.7, 85.6, 80.3, 70.3, 63.9, 44.1, 19.9. **HRMS (ESI) m/z:** [M+H]<sup>+</sup> calcd for C<sub>26</sub>H<sub>21</sub>NO<sub>5</sub><sup>+</sup> 4427.1419; found: 427.1421.

**1-benzyl-3-(but-3-en-1-yloxy)-3-(6-hydroxybenzo[*d*][1,3]dioxol-5-yl)indolin-2-one (5f)**

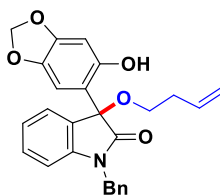

Flash column chromatography on a silica gel (petroleum ether: ethyl acetate, 7:1) afforded the product as a white solid (27.4 mg, 64% yield). M.p. 143 - 145 °C.

**<sup>1</sup>H NMR** (400 MHz, CDCl<sub>3</sub>) δ 8.84 (s, 1H), 7.41 (dd, *J* = 7.4, 1.3 Hz, 1H), 7.34 – 7.24 (m, 6H), 7.14 (td, *J* = 7.6, 1.0 Hz, 1H), 6.81 – 6.77 (m, 1H), 6.54 (s, 1H), 6.03 (s, 1H), 5.84 – 5.72 (m, 3H), 5.16 – 5.08 (m, 2H), 4.95 – 4.84 (m, 2H), 3.43 (dt, *J* = 8.3, 6.5 Hz, 1H), 3.31 (dt, *J* = 8.3, 6.3 Hz, 1H), 2.40 – 2.37 (m, 2H). **<sup>13</sup>C NMR** (100 MHz, CDCl<sub>3</sub>) δ 175.7, 153.6, 149.0, 143.1, 140.5, 135.2, 134.3, 130.6, 129.0, 127.9, 127.3, 126.7, 126.2, 123.8, 117.6, 113.1, 110.1, 106.8, 101.3, 100.5, 85.6, 65.0, 44.1, 34.0. **HRMS (ESI) m/z:** [M+H]<sup>+</sup> calcd for C<sub>26</sub>H<sub>24</sub>NO<sub>5</sub><sup>+</sup> 430.1649; found: 430.1646.

**1-benzyl-3-(but-2-en-1-yloxy)-3-(6-hydroxybenzo[*d*][1,3]dioxol-5-yl)indolin-2-one (5g)**

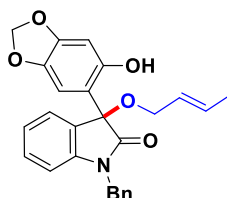

Flash column chromatography on a silica gel (petroleum ether: ethyl acetate, 8:1) afforded the product as a white solid (28.3 mg, 66% yield). M.p. 146 - 148 °C.

**<sup>1</sup>H NMR** (400 MHz, CDCl<sub>3</sub>) δ 8.98 (s, 1H), 7.43 (dd, *J* = 7.5, 1.3 Hz, 1H), 7.32 – 7.24 (m, 6H), 7.15 (td, *J* = 7.5, 1.0 Hz, 1H), 6.79 (d, *J* = 7.9 Hz, 1H), 6.55 (s, 1H), 6.06 (s, 1H), 5.82 (q, *J* = 1.4 Hz, 2H), 5.73 – 5.53 (m, 2H), 4.89 (s, 2H), 3.89 – 3.84 (m, 1H), 3.77 – 3.73 (m, 1H), 1.66 (dt, *J* = 6.4, 1.2 Hz, 3H). **<sup>13</sup>C NMR** (100 MHz, CDCl<sub>3</sub>) δ 176.1, 153.7, 149.0, 143.1, 140.5, 135.2, 131.3, 130.6, 129.0, 127.9, 127.3, 126.6, 126.3, 126.0, 123.7, 113.1, 110.2, 107.0, 101.3, 100.6, 85.3, 66.8, 44.1, 17.9. **HRMS (ESI) m/z:** [M+H]<sup>+</sup> calcd for C<sub>26</sub>H<sub>24</sub>NO<sub>5</sub><sup>+</sup> 430.1649; found: 430.1646.

**1-benzyl-3-((3,7-dimethyloct-6-en-1-yl)oxy)-3-(6-hydroxybenzo[*d*][1,3]dioxol-5-yl)indolin-2-one (5h)**

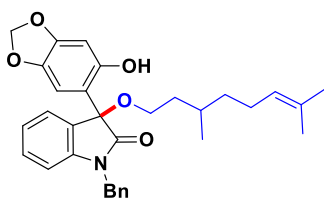

Flash column chromatography on a silica gel (petroleum ether: ethyl acetate, 15:1) afforded the product as a white solid (26.6 mg, 52% yield, *dr* = 1:1). M.p. 137 - 139 °C.

**<sup>1</sup>H NMR** (400 MHz, CDCl<sub>3</sub>) δ 8.96 (d, *J* = 2.1 Hz, 1H), 7.40 (dd, *J* = 7.4, 1.3 Hz, 1H), 7.32 – 7.22 (m, 6H), 7.14 (td, *J* = 7.5, 1.0 Hz, 1H), 6.80 (d, *J* = 7.9 Hz, 1H), 6.54 (s, 1H), 6.04 (d, *J* = 2.5 Hz, 1H), 5.80 (q, *J* = 1.5 Hz, 2H), 5.08 – 5.03 (m, 1H), 4.95 (dd, *J* = 15.7, 4.4 Hz, 1H), 4.83 (dd, *J* = 15.6, 4.3 Hz, 1H), 3.46 – 3.38 (m, 1H), 3.29 – 3.21 (m, 1H), 2.00 – 1.87 (m, 2H), 1.76 – 1.64 (m, 4H), 1.57 (t, *J* = 1.6 Hz, 4H), 1.50 – 1.37 (m, 1H), 1.31 – 1.21 (m, 1H), 1.15 – 1.04 (m, 1H), 0.82 (dd, *J* = 20.3, 6.6 Hz, 3H). **<sup>13</sup>C NMR** (100 MHz, CDCl<sub>3</sub>) δ 176.0, 176.0, 153.7, 153.7, 148.9, 143.2, 143.1, 140.5, 135.3, 135.3, 131.3, 131.3, 130.6, 129.0, 127.9, 127.4, 127.3, 126.8, 126.7, 126.2, 126.2, 124.7, 124.7, 123.7, 113.3, 113.3, 110.1, 106.9, 101.3, 100.5, 85.5, 64.3, 64.1, 44.1, 37.0, 36.7, 36.6, 29.3, 29.3, 25.8, 25.4, 25.4, 19.4, 19.3, 17.7. **HRMS (ESI) m/z:** [M+H]<sup>+</sup> calcd for C<sub>32</sub>H<sub>36</sub>NO<sub>5</sub><sup>+</sup> 514.2588; found: 514.2586.

### 1-benzyl-3-((3,7-dimethylocta-2,6-dien-1-yl)oxy)-3-(6-hydroxybenzo[*d*][1,3]dioxol-5-yl)indolin-2-one (5i)

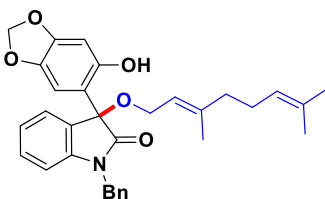

Flash column chromatography on a silica gel (petroleum ether: ethyl acetate, 15:1) afforded the product as a white solid (25.0 mg, 49% yield). M.p. 126 - 128 °C.

**<sup>1</sup>H NMR** (500 MHz, CDCl<sub>3</sub>) δ 9.00 (s, 1H), 7.44 (dd, *J* = 7.4, 1.3 Hz, 1H), 7.32 – 7.24 (m, 6H), 7.14 (td, *J* = 7.5, 1.0 Hz, 1H), 6.80 (d, *J* = 7.9 Hz, 1H), 6.54 (s, 1H), 6.04 (s, 1H), 5.81 (q, *J* = 1.5 Hz, 2H), 5.38 (tq, *J* = 7.0, 1.3 Hz, 1H), 5.07 – 5.04 (m, 1H), 4.90 (s, 2H), 3.95 (dd, *J* = 10.2, 7.1 Hz, 1H), 3.79 (dd, *J* = 10.2, 6.9 Hz, 1H), 2.06 (dd, *J* = 10.5, 4.9 Hz, 2H), 2.00 (dd, *J* = 9.4, 6.0 Hz, 2H), 1.67 (d, *J* = 1.4 Hz, 3H), 1.56 (dd, *J* = 18.5, 1.4 Hz, 6H). **<sup>13</sup>C NMR** (100 MHz, CDCl<sub>3</sub>) δ 176.0, 153.7, 148.9, 143.1, 142.8, 140.5, 135.3, 131.8, 130.6, 129.0, 127.9, 127.4, 126.8, 126.2, 123.8, 123.7, 119.0, 113.2, 110.1, 106.9, 101.2, 100.5, 85.3, 62.6, 44.1, 39.5, 26.3, 25.7, 17.8, 16.5. **HRMS (ESI) m/z:** [M+H]<sup>+</sup> calcd for C<sub>32</sub>H<sub>34</sub>NO<sub>5</sub><sup>+</sup> 512.2431; found: 512.2433.

### 1-benzyl-3-(6-hydroxybenzo[*d*][1,3]dioxol-5-yl)-3-(((2E,6E)-3,7,11-trimethyldodeca-2,6,10-trien-1-yl)oxy)indolin-2-one (5j)

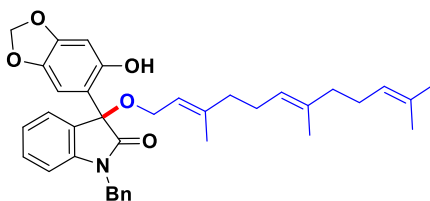

Flash column chromatography on a silica gel (petroleum ether: ethyl acetate, 15:1) afforded the product as a white solid (24.8mg, 43% yield, *dr* = 1.5:1). M.p. 113 - 115 °C.

**<sup>1</sup>H NMR** (400 MHz, CDCl<sub>3</sub>) δ 9.00 (d, *J* = 2.0 Hz, 1H), 7.44 (dd, *J* = 7.3, 1.3 Hz, 1H), 7.33 – 7.26 (m, 6H), 7.15 (td, *J* = 7.6, 1.0 Hz, 1H), 6.82 – 6.77 (m, 1H), 6.54 (s, 1H), 6.03 (s, 1H), 5.81 (d, *J* = 1.8 Hz, 2H), 5.40 – 5.36 (m, 1H), 5.13 – 5.04 (m, 2H), 4.90 (s, 2H), 3.95 (dd, *J* = 10.1, 7.1 Hz, 1H), 3.78 (dd, *J* = 10.1, 7.0 Hz, 1H), 2.11 – 1.93 (m, 8H), 1.69 – 1.66 (m, 5H), 1.61 – 1.57 (m, 5H), 1.55 (d, *J* = 1.4 Hz, 2H). **<sup>13</sup>C NMR** (100 MHz, CDCl<sub>3</sub>) δ 175.9, 153.7, 148.9, 143.1, 142.9, 142.8, 140.5, 135.6, 135.5, 135.3, 131.6, 131.3, 130.6, 129.0, 127.9, 127.3, 126.8, 126.3, 124.5, 124.4, 124.3, 123.7, 123.7, 118.9, 118.9, 113.2, 110.1, 106.9, 101.2, 100.5, 85.3, 62.5, 44.1, 39.8, 39.7, 39.5, 32.0, 26.7, 26.6, 26.2, 26.1, 25.8, 25.7, 23.4, 17.7, 17.9, 16.5, 16.5, 16.1. **HRMS (ESI) m/z:** [M+H]<sup>+</sup> calcd for C<sub>37</sub>H<sub>41</sub>NO<sub>5</sub><sup>+</sup> 579.2984; found: 579.2985.

### 1-benzyl-3-(ethylthio)-3-(6-hydroxybenzo[*d*][1,3]dioxol-5-yl)indolin-2-one (6a)

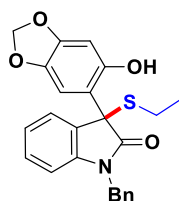

Flash column chromatography on a silica gel (petroleum ether: ethyl acetate, 8:1) afforded the product as a white solid (33.1 mg, 79% yield). M.p. 154 - 156 °C.

**<sup>1</sup>H NMR** (400 MHz, CDCl<sub>3</sub>) δ 9.08 (s, 1H), 7.44 (dd, *J* = 7.5, 1.3 Hz, 1H), 7.34 – 7.25 (m, 5H), 7.22 (td, *J* = 7.7, 1.3 Hz, 1H), 7.13 (td, *J* = 7.6, 1.1 Hz, 1H), 6.78 (d, *J* = 5.9 Hz, 2H), 6.49 (s, 1H), 5.86 (dd, *J* = 7.9, 1.5 Hz, 2H), 4.98 (d, *J* = 15.7 Hz, 1H), 4.89 (d, *J* = 15.7 Hz, 1H), 2.46 – 2.32 (m, 2H), 1.08 (t, *J* = 7.5 Hz, 3H). **<sup>13</sup>C NMR** (100 MHz, CDCl<sub>3</sub>) δ 178.1, 152.3, 148.6, 141.5, 141.1, 135.2, 129.5, 129.2, 128.9, 127.9, 127.3, 126.3, 123.5, 112.2, 109.9, 108.1, 101.3, 101.0, 58.5, 44.3, 24.1, 13.3. **HRMS (ESI) m/z:** [M+Na]<sup>+</sup> calcd for C<sub>24</sub>H<sub>21</sub>NNaO<sub>4</sub>S<sup>+</sup> 442.1083; found: 442.1077.

### 1-benzyl-3-(6-hydroxybenzo[*d*][1,3]dioxol-5-yl)-3-(propylthio)indolin-2-one (6b)

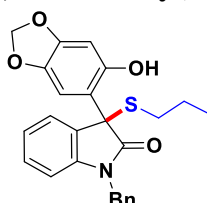

Flash column chromatography on a silica gel (petroleum ether: ethyl acetate, 8:1) afforded the product as a white solid (32.4 mg, 75% yield). M.p. 147 - 149 °C.

**<sup>1</sup>H NMR** (400 MHz, CDCl<sub>3</sub>) δ 9.17 (s, 1H), 7.48 (dd, *J* = 7.5, 1.3 Hz, 1H), 7.32 – 7.26 (m, 5H), 7.23 (dd, *J* = 7.7, 1.4 Hz, 1H), 7.14 (td, *J* = 7.6, 1.1 Hz, 1H), 6.80 (dd, *J* = 7.9, 1.2 Hz, 1H), 6.72 (s, 1H), 6.52 (s, 1H), 5.89 – 5.85 (m, 2H), 5.01 (d, *J* = 15.6 Hz, 1H), 4.87 (d, *J* = 15.7 Hz, 1H), 2.39 – 2.24 (m, 2H), 1.50 – 1.36 (m, 2H), 0.84 (t, *J* = 7.4 Hz, 3H). **<sup>13</sup>C NMR** (100 MHz, CDCl<sub>3</sub>) δ 178.0, 152.5, 148.7, 141.5, 141.1, 135.2, 129.5, 129.2, 128.9, 127.9, 127.4, 126.4, 123.6, 112.0, 109.9, 108.1, 101.3, 101.1, 58.5, 44.3, 32.0, 21.8, 13.6. **HRMS (ESI) m/z:** [M+H]<sup>+</sup> calcd for C<sub>25</sub>H<sub>24</sub>NO<sub>4</sub>S<sup>+</sup> 434.1420; found: 434.1422.

### 1-benzyl-3-(6-hydroxybenzo[*d*][1,3]dioxol-5-yl)-3-(pentylthio)indolin-2-one (6c)

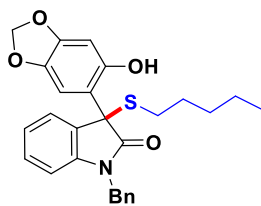

Flash column chromatography on a silica gel (petroleum ether: ethyl acetate, 8:1) afforded the product as a white solid (34.1 mg, 74% yield). M.p. 134 - 136 °C.

**<sup>1</sup>H NMR** (400 MHz, CDCl<sub>3</sub>) δ 9.04 (s, 1H), 7.41 (dd, *J* = 7.5, 1.3 Hz, 1H), 7.34 – 7.25 (m, 5H), 7.21 (td, *J* = 7.7, 1.4 Hz, 1H), 7.11 (td, *J* = 7.6, 1.1 Hz, 1H), 6.81 (s, 1H), 6.77 (dd, *J* = 7.9, 1.1 Hz, 1H), 6.47 (s, 1H), 5.86 (dd, *J* = 8.9, 1.4 Hz, 2H), 5.00 (d, *J* = 15.7 Hz, 1H), 4.84 (d, *J* = 15.7 Hz, 1H), 2.43 – 2.33 (m, 2H), 1.48 – 1.36 (m, 2H), 1.28 – 1.12 (m, 4H), 0.81 (t, *J* = 7.0 Hz, 3H). **<sup>13</sup>C NMR** (100 MHz, CDCl<sub>3</sub>) δ 178.2, 152.2, 148.5, 141.5, 141.1, 135.3, 129.6, 129.1, 128.9, 127.8, 127.4, 126.1, 123.5, 112.2, 109.9, 108.1, 101.3, 100.9, 58.3, 44.3, 31.0, 29.8, 28.0, 22.2, 13.9. **HRMS (ESI) m/z:** [M+H]<sup>+</sup> calcd for C<sub>27</sub>H<sub>27</sub>NO<sub>4</sub>S<sup>+</sup> 462.1733; found: 462.1732.

### 1-benzyl-3-(6-hydroxybenzo[d][1,3]dioxol-5-yl)-3-(phenethylthio)indolin-2-one (6d)

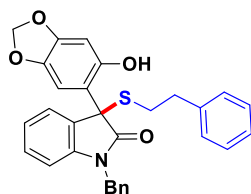

Flash column chromatography on a silica gel (petroleum ether: ethyl acetate, 7:1) afforded the product as a white solid (36.1 mg, 73% yield). M.p. 151 - 153 °C.

**<sup>1</sup>H NMR** (400 MHz, CDCl<sub>3</sub>) δ 9.01 (s, 1H), 7.40 (dd, *J* = 7.4, 1.3 Hz, 1H), 7.30 – 7.15 (m, 9H), 7.11 (td, *J* = 7.6, 1.1 Hz, 1H), 7.03 – 6.97 (m, 2H), 6.79 – 6.75 (m, 2H), 6.48 (s, 1H), 5.86 (dd, *J* = 7.6, 1.4 Hz, 2H), 5.00 (d, *J* = 15.7 Hz, 1H), 4.84 (d, *J* = 15.7 Hz, 1H), 2.79 – 2.55 (m, 4H). **<sup>13</sup>C NMR** (100 MHz, CDCl<sub>3</sub>) δ 178.1, 152.2, 148.7, 141.5, 141.1, 139.8, 135.2, 129.4, 129.3, 128.9, 128.5, 128.4, 127.9, 127.3, 126.4, 126., 123.6, 112.1, 109.9, 108.2, 101.4, 101.0, 58.5, 44.4, 34.9, 31.3. **HRMS (ESI) m/z:** [M+H]<sup>+</sup> calcd for C<sub>30</sub>H<sub>26</sub>NO<sub>4</sub>S<sup>+</sup> 496.1577; found: 496.1578.

### 1-benzyl-3-((furan-2-ylmethyl)thio)-3-(6-hydroxybenzo[d][1,3]dioxol-5-yl)indolin-2-one (6e)

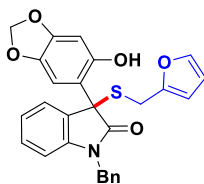

Flash column chromatography on a silica gel (petroleum ether: ethyl acetate, 7:1) afforded the product as a white solid (33.4mg, 71% yield). M.p. 145 - 147 °C.

**<sup>1</sup>H NMR** (400 MHz, CDCl<sub>3</sub>) δ 8.81 (s, 1H), 7.36 (dd, *J* = 7.5, 1.2 Hz, 1H), 7.31 – 7.25 (m, 6H), 7.21 (td, *J* = 7.7, 1.2 Hz, 1H), 7.10 (td, *J* = 7.6, 1.1 Hz, 1H), 6.88 (s, 1H), 6.75 (dd, *J* = 8.0, 1.0 Hz, 1H), 6.47 (s, 1H), 6.20 (dd, *J* = 3.2, 1.9 Hz, 1H), 5.95 (dd, *J* = 3.3, 0.8 Hz, 1H), 5.88 (dd, *J* = 7.4, 1.5 Hz, 2H), 4.92 (d, *J* = 15.8 Hz, 1H), 4.85 (d, *J* = 15.7 Hz, 1H), 3.71 (q, *J* = 14.0 Hz, 2H). **<sup>13</sup>C NMR** (100 MHz,

CDCl<sub>3</sub>)  $\delta$  177.7, 152.0, 149.6, 148.7, 142.3, 141.6, 141.3, 135.2, 129.3, 128.9, 128.6, 127.8, 127.3, 126.1, 123.6, 112.1, 110.5, 109.9, 108.2, 108.2, 101.4, 100.9, 58.5, 44.3, 27.1. **HRMS (ESI) m/z:** [M+H]<sup>+</sup> calcd for C<sub>27</sub>H<sub>22</sub>NO<sub>5</sub>S<sup>+</sup> 472.1213; found: 472.1215.

### 1-benzyl-3-(6-hydroxybenzo[d][1,3]dioxol-5-yl)-3-(p-tolylthio)indolin-2-one (6f)

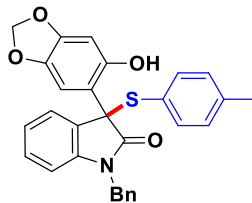

Flash column chromatography on a silica gel (petroleum ether: ethyl acetate, 7:1) afforded the product as a light yellow solid (34.1 mg, 71% yield). M.p. 201 - 203 °C.

**<sup>1</sup>H NMR** (400 MHz, CDCl<sub>3</sub>)  $\delta$  10.48 (s, 1H), 7.61 (dd,  $J$  = 7.4, 1.4 Hz, 1H), 7.24 – 7.11 (m, 5H), 7.06 – 7.02 (m, 2H), 6.88 – 6.84 (m, 2H), 6.83 – 6.79 (m, 2H), 6.68 (s, 1H), 6.64 (s, 1H), 6.49 – 6.46 (m, 1H), 5.86 (dd,  $J$  = 17.9, 1.4 Hz, 2H), 4.63 (d,  $J$  = 15.8 Hz, 1H), 4.56 (d,  $J$  = 15.9 Hz, 1H), 2.27 (s, 3H). **<sup>13</sup>C NMR** (100 MHz, CDCl<sub>3</sub>)  $\delta$  178.0, 153.7, 149.2, 141.7, 141.0, 140.0, 136.9, 134.4, 129.4, 129.2, 129.1, 128.7, 128.0, 127.6, 127.0, 126.2, 123.3, 110.6, 110.1, 108.3, 101.7, 101.4, 63.9, 44.4, 21.4. **HRMS (ESI) m/z:** [M+H]<sup>+</sup> calcd for C<sub>29</sub>H<sub>24</sub>NO<sub>4</sub>S<sup>+</sup> 482.1420; found: 482.1421.

### 3-(2-hydroxy-5-methoxyphenyl)-5-methoxy-3-(2,4,6-trimethoxyphenyl)benzofuran-2(3H)-one (8a)

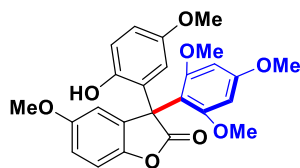

Flash column chromatography on a silica gel (petroleum ether: ethyl acetate, 8:1) afforded the product as a white solid (28.9 mg, 64% yield). M.p. 86 - 88 °C.

**<sup>1</sup>H NMR** (400 MHz, CDCl<sub>3</sub>)  $\delta$  7.17 (s, 1H), 7.08 (d,  $J$  = 8.8 Hz, 1H), 6.90 – 6.83 (m, 2H), 6.80 (d,  $J$  = 2.7 Hz, 1H), 6.71 (dd,  $J$  = 8.7, 3.0 Hz, 1H), 6.36 (d,  $J$  = 3.0 Hz, 1H), 6.13 – 6.10 (m, 2H), 3.75 (d,  $J$  = 4.3 Hz, 6H), 3.67 (s, 3H), 3.64 (s, 3H), 3.34 (s, 3H). **<sup>13</sup>C NMR** (100 MHz, CDCl<sub>3</sub>)  $\delta$  181.5, 161.1, 160.2, 157.6, 156.9, 153.4, 149.7, 146.9, 131.0, 127.8, 119.1, 115.0, 114.0, 112.6, 112.4, 111.2, 107.7, 92.8, 92.3, 56.2, 56.1, 55.9, 55.8, 55.7, 55.3. **HRMS (ESI) m/z:** [M+H]<sup>+</sup> calcd for C<sub>25</sub>H<sub>25</sub>O<sub>8</sub><sup>+</sup> 453.1543; found: 453.0546.

### 3-(4-(diallylamino)phenyl)-3-(2-hydroxy-5-methoxyphenyl)-5-methoxybenzofuran-2(3H)-one (8b)

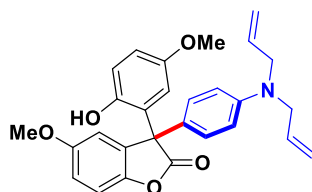

Flash column chromatography on a silica gel (petroleum ether: ethyl acetate, 8:1) afforded the product as a white solid (32.4 mg, 71% yield). M.p. 81 - 83 °C.



**<sup>1</sup>H NMR** (400 MHz, CDCl<sub>3</sub>) δ 7.12 – 7.05 (m, 3H), 6.83 (dd, *J* = 8.8, 2.7 Hz, 1H), 6.77 – 6.71 (m, 2H), 6.69 (d, *J* = 2.8 Hz, 1H), 6.64 – 6.59 (m, 3H), 5.98 (s, 1H), 5.87 – 5.76 (m, 2H), 5.18 – 5.14 (m, 2H), 5.12 (t, *J* = 1.7 Hz, 2H), 3.89 (dd, *J* = 4.2, 2.5 Hz, 4H), 3.74 (s, 3H), 3.67 (s, 3H). **<sup>13</sup>C NMR** (100 MHz, CDCl<sub>3</sub>) δ 179.7, 156.6, 153.4, 148.5, 148.1, 146.9, 133.6, 131.8, 128.8, 128.2, 124.1, 118.4, 116.3, 116.2, 113.8, 113.6, 112.3, 112.2, 111.3, 59.3, 55.9, 55.7, 52.7. **HRMS (ESI) m/z:** [M+H]<sup>+</sup> calcd for C<sub>28</sub>H<sub>28</sub>NO<sub>5</sub><sup>+</sup> 458.1962; found: 458.1960.

### 3-(2-hydroxy-5-methoxyphenyl)-3-(1*H*-indol-3-yl)-5-methoxybenzofuran-2(3*H*)-one (8c)

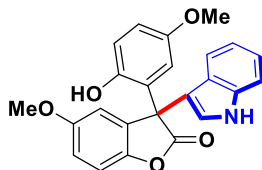

Flash column chromatography on a silica gel (petroleum ether: ethyl acetate, 5:1) afforded the product as a white solid (30.4 mg, 76% yield). M.p. 92 - 94 °C.

**<sup>1</sup>H NMR** (400 MHz, DMSO-*d*<sub>6</sub>) δ 11.24 (d, *J* = 2.7 Hz, 1H), 9.52 (s, 1H), 7.49 – 7.43 (m, 2H), 7.19 (d, *J* = 8.7 Hz, 1H), 7.16 – 7.10 (m, 1H), 6.99 – 6.91 (m, 2H), 6.80 – 6.70 (m, 3H), 6.63 (d, *J* = 2.7 Hz, 1H), 6.50 (d, *J* = 3.0 Hz, 1H), 3.70 (s, 3H), 3.45 (s, 3H). **<sup>13</sup>C NMR** (100 MHz, DMSO-*d*<sub>6</sub>) δ 176.5, 156.4, 152.2, 148.4, 147.4, 138.0, 132.7, 127.2, 126.7, 125.4, 123.0, 122.1, 119.2, 116.7, 116.1, 113.9, 113.4, 112.4, 111.6, 111.0, 56.1, 55.5, 55.3, 54.3. **HRMS (ESI) m/z:** [M+H]<sup>+</sup> calcd for C<sub>24</sub>H<sub>20</sub>NO<sub>5</sub><sup>+</sup> 402.1336; found: 402.1337.

### 3-(2-hydroxy-5-methoxyphenyl)-5-methoxy-3-(pyrrolidin-1-yl)benzofuran-2(3*H*)-one (8d)

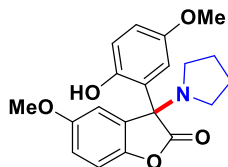

Flash column chromatography on a silica gel (petroleum ether: ethyl acetate, 15:1) afforded the product as a light yellow solid (20.5 mg, 58% yield). M.p. 83 - 85 °C.

**<sup>1</sup>H NMR** (400 MHz, CDCl<sub>3</sub>) δ 11.05 (s, 1H), 7.24 (d, *J* = 2.7 Hz, 1H), 7.05 (d, *J* = 8.8 Hz, 1H), 6.89 – 6.85 (m, 2H), 6.77 (dd, *J* = 8.9, 2.9 Hz, 1H), 6.36 (d, *J* = 2.9 Hz, 1H), 3.77 (s, 3H), 3.66 (s, 3H), 3.10 – 2.49 (m, 4H), 1.90 – 1.80 (m, 4H). **<sup>13</sup>C NMR** (100 MHz, CDCl<sub>3</sub>) δ 173.5, 157.1, 152.4, 151.3, 146.2, 129.0, 122.5, 118.1, 115.7, 115.1, 112.8, 111.9, 110.6, 72.2, 55.9, 55.7, 23.7. **HRMS (ESI) m/z:** [M+H]<sup>+</sup> calcd for C<sub>20</sub>H<sub>22</sub>NO<sub>5</sub><sup>+</sup> 356.1492; found: 356.1496.

### 3-(dimethylamino)-3-(2-hydroxy-5-methoxyphenyl)-5-methoxybenzofuran-2(3*H*)-one (8e)

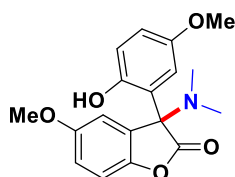

Flash column chromatography on a silica gel (petroleum ether: ethyl acetate, 15:1) afforded the product as a light yellow solid (17.1 mg, 52% yield). M.p. 79 - 81 °C.

<sup>1</sup>H NMR (400 MHz, CDCl<sub>3</sub>) δ 10.80 (s, 1H), 7.19 (d, *J* = 2.7 Hz, 1H), 7.07 (d, *J* = 8.8 Hz, 1H), 6.89 (dd, *J* = 8.8, 2.8 Hz, 2H), 6.78 (dd, *J* = 8.9, 3.0 Hz, 1H), 6.33 (d, *J* = 3.0 Hz, 1H), 3.77 (s, 3H), 3.66 (s, 3H), 2.44 (d, *J* = 65.6 Hz, 6H). <sup>13</sup>C NMR (100 MHz, CDCl<sub>3</sub>) δ 172.7, 157.1, 152.5, 151.1, 146.5, 127.9, 122.1, 118.3, 115.9, 115.1, 113.3, 111.9, 110.6, 74.9, 55.9, 55.7, 39.3. HRMS (ESI) *m/z*: [M+H]<sup>+</sup> calcd for C<sub>18</sub>H<sub>20</sub>NO<sub>5</sub><sup>+</sup> 330.1336; found: 330.1337.

### 3-ethoxy-3-(2-hydroxy-5-methoxyphenyl)-5-methoxybenzofuran-2(3*H*)-one (8f)

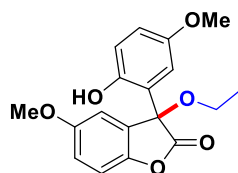

Flash column chromatography on a silica gel (petroleum ether: ethyl acetate, 10:1) afforded the product as a white solid (17.8 mg, 54% yield). M.p. 74 - 76 °C.

<sup>1</sup>H NMR (400 MHz, DMSO-*d*<sub>6</sub>) δ 9.42 (s, 1H), 7.31 (d, *J* = 3.1 Hz, 1H), 7.21 (d, *J* = 8.8 Hz, 1H), 6.97 (dd, *J* = 8.8, 2.8 Hz, 1H), 6.79 (dd, *J* = 8.7, 3.1 Hz, 1H), 6.65 – 6.59 (m, 2H), 3.75 (s, 3H), 3.67 (s, 3H), 3.30 – 3.20 (m, 2H), 1.18 (t, *J* = 6.9 Hz, 3H). <sup>13</sup>C NMR (100 MHz, DMSO-*d*<sub>6</sub>) δ 175.1, 156.8, 152.6, 148.3, 147.1, 127.8, 126.6, 116.4, 116.2, 114.6, 112.5, 111.7, 110.5, 79.9, 60.5, 56.1, 55.9, 15.5. HRMS (ESI) *m/z*: [M+H]<sup>+</sup> calcd for C<sub>18</sub>H<sub>19</sub>O<sub>6</sub><sup>+</sup> 331.1176; found: 331.1174.

### *N,N*-diallyl-4-(6-benzyl-5a,6-dihydro-10*bH*-[1,3]dioxolo[4',5':5,6]benzofuro[2,3-*b*]indol-10*b*-yl)aniline (11a)

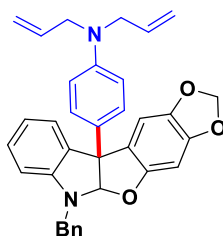

Flash column chromatography on a silica gel (petroleum ether: ethyl acetate, 20:1) afforded the product as a white solid (29.7 mg, 58% yield, *dr* > 20:1). M.p. 112 - 114 °C.

<sup>1</sup>H NMR (400 MHz, CDCl<sub>3</sub>) δ 7.36 – 7.23 (m, 5H), 7.13 (dd, *J* = 7.4, 1.3 Hz, 1H), 7.03 (td, *J* = 7.7, 1.3 Hz, 1H), 6.96 – 6.91 (m, 2H), 6.77 – 6.70 (m, 2H), 6.63 – 6.57 (m, 2H), 6.45 – 6.38 (m, 2H), 5.95 (s, 1H), 5.90 (d, *J* = 1.4 Hz, 1H), 5.89 – 5.75 (m, 3H), 5.22 – 5.10 (m, 4H), 4.67 – 4.54 (m, 2H), 3.88 (dt, *J* = 4.9, 1.8 Hz, 4H). <sup>13</sup>C NMR (100 MHz, CDCl<sub>3</sub>) δ 154.4, 149.3, 147.8, 147.5, 142.1, 137.8, 134.0, 133.2, 130.3, 128.7, 128.6, 128.1, 127.3, 127.1, 124.3, 123.5, 118.7, 116.2, 112.1, 110.8, 106.7, 104.9, 101.2, 93.3, 63.4, 52.8, 49.4. HRMS (ESI) *m/z*: [M+H]<sup>+</sup> calcd for C<sub>34</sub>H<sub>31</sub>N<sub>2</sub>O<sub>3</sub><sup>+</sup> 515.2329; found: 515.2326.

### *N,N*-diallyl-4-((10*bR*)-6-benzyl-5a,6-dihydro-10*bH*-[1,3]dioxolo[4',5':5,6]benzofuro[2,3-*b*]indol-10*b*-yl-5a-*d*)aniline (11b)

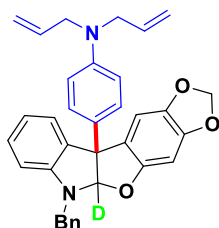

Flash column chromatography on a silica gel (petroleum ether: ethyl acetate, 20:1) afforded the product as a white solid (28.3 mg, 55% yield, *dr* > 20:1). M.p. 115 - 117 °C.

**<sup>1</sup>H NMR** (500 MHz, CDCl<sub>3</sub>) δ 7.33 – 7.24 (m, 4H), 7.21 (dt, *J* = 7.3, 3.4 Hz, 1H), 7.12 (dd, *J* = 7.2, 2.4 Hz, 1H), 7.02 (td, *J* = 7.7, 2.2 Hz, 1H), 6.93 (dd, *J* = 8.9, 3.0 Hz, 2H), 6.74 – 6.69 (m, 2H), 6.62 – 6.57 (m, 2H), 6.43 (d, *J* = 2.6 Hz, 1H), 6.39 (dd, *J* = 8.0, 2.2 Hz, 1H), 5.88 (s, 1H), 5.87 – 5.76 (m, 3H), 5.19 – 5.10 (m, 4H), 4.66 – 4.53 (m, 2H), 3.87 (dd, *J* = 5.2, 2.4 Hz, 4H). **<sup>13</sup>C NMR** (100 MHz, CDCl<sub>3</sub>) δ 154.4, 149.3, 147.8, 147.5, 142.1, 137.8, 134.0, 133.2, 130.3, 128.7, 128.6, 128.1, 127.3, 127.1, 124.3, 123.5, 118.7, 116.2, 112.1, 110.8, 106.7, 104.9, 101.2, 93.3, 63.4, 52.8, 49.4. **HRMS (ESI) m/z:** [M+H]<sup>+</sup> calcd for C<sub>34</sub>H<sub>30</sub>DN<sub>2</sub>O<sub>3</sub><sup>+</sup> 516.2392; found: 516.2390.

### 6-benzyl-10b-(1H-indol-3-yl)-5a,10b-dihydro-6H-[1,3]dioxolo[4',5':5,6]benzofuro[2,3-b]indole (11c)

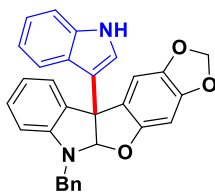

Flash column chromatography on a silica gel (petroleum ether: ethyl acetate, 15:1) afforded the product as a white solid (24.2 mg, 53% yield, *dr* > 20:1). M.p. 124 - 126 °C.

**<sup>1</sup>H NMR** (500 MHz, CDCl<sub>3</sub>) δ 7.97 (s, 1H), 7.35 – 7.28 (m, 3H), 7.27 – 7.18 (m, 4H), 7.16 – 7.11 (m, 1H), 7.10 – 7.03 (m, 1H), 6.89 (dd, *J* = 16.2, 3.3 Hz, 3H), 6.76 – 6.68 (m, 2H), 6.49 (s, 1H), 6.46 (d, *J* = 7.9 Hz, 1H), 6.25 (s, 1H), 5.88 (d, *J* = 1.4 Hz, 1H), 5.81 (d, *J* = 1.4 Hz, 1H), 4.70 – 4.58 (m, 2H). **<sup>13</sup>C NMR** (100 MHz, CDCl<sub>3</sub>) δ 153.8, 148.8, 147.7, 142.1, 137.8, 137.3, 132.3, 128.6, 128.4, 127.4, 127.3, 125.7, 123.9, 123.7, 123.1, 122.3, 120.1, 119.8, 118.7, 117.7, 111.4, 109.1, 106.8, 104.6, 101.3, 93.5, 58.7, 49.5. **HRMS (ESI) m/z:** [M+H]<sup>+</sup> calcd for C<sub>30</sub>H<sub>23</sub>N<sub>2</sub>O<sub>3</sub><sup>+</sup> 459.1703; found: 459.1705.

### N,N-diallyl-4-(5a-allyl-6-benzyl-5a,6-dihydro-10bH-[1,3]dioxolo[4',5':5,6]benzofuro[2,3-b]indol-10b-yl)aniline (11d)

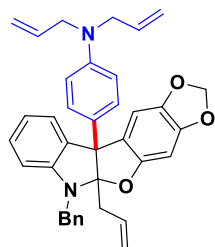

Flash column chromatography on a silica gel (petroleum ether: ethyl acetate, 20:1) afforded the product as a white solid (34.2 mg, 62% yield, *dr* = 13:1). M.p. 109 - 111 °C.

**<sup>1</sup>H NMR** (400 MHz, CDCl<sub>3</sub>) δ 7.27 (d, *J* = 3.5 Hz, 4H), 7.23 – 7.18 (m, 1H), 7.08 (dd, *J* = 7.3, 1.3 Hz, 1H), 7.00 – 6.93 (m, 3H), 6.71 – 6.66 (m, 2H), 6.64 – 6.58 (m, 2H), 6.38 (s, 1H), 6.20 (dd, *J* = 7.9, 0.9 Hz, 1H), 5.91 – 5.79 (m, 4H), 5.43 – 5.32 (m, 1H), 5.19 – 5.15 (m, 2H), 5.15 – 5.13 (m, 2H), 4.74 – 4.51 (m, 4H), 3.90 (dt, *J* = 5.1, 1.7 Hz, 4H), 2.62 – 2.41 (m, 2H). **<sup>13</sup>C NMR** (100 MHz, CDCl<sub>3</sub>) δ 153.7, 149.7, 148.0, 147.4, 142.0, 138.8, 134.0, 133.2, 131.8, 130.7, 128.5, 127.9, 127.0, 126.8, 126.6, 124.6, 124.0, 118.6, 117.8, 116.2, 114.5, 111.7, 106.9, 105.1, 101.2, 93.0, 66.5, 52.8, 47.6, 39.6. **HRMS (ESI)** *m/z*: [M+H]<sup>+</sup> calcd for C<sub>37</sub>H<sub>35</sub>N<sub>2</sub>O<sub>3</sub><sup>+</sup> 555.2642; found: 555.2643.

**5a-allyl-6-benzyl-10b-(5-methylfuran-2-yl)-5a,10b-dihydro-6H-[1,3]dioxolo[4',5':5,6]benzofuro[2,3-*b*]indole (11e)**

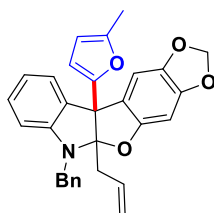

Flash column chromatography on a silica gel (petroleum ether: ethyl acetate, 20:1) afforded the product as a white solid (28.2 mg, 61% yield, *dr* = 6:1). M.p. 104 - 106 °C.

**<sup>1</sup>H NMR** (400 MHz, CDCl<sub>3</sub>) δ 7.33 – 7.21 (m, 5H), 7.14 (dd, *J* = 7.4, 1.3 Hz, 1H), 7.00 – 6.94 (m, 1H), 6.72 (s, 1H), 6.71 – 6.66 (m, 1H), 6.38 (s, 1H), 6.22 – 6.18 (m, 1H), 6.03 (d, *J* = 3.1 Hz, 1H), 5.91 (dd, *J* = 3.1, 1.1 Hz, 1H), 5.90 (d, *J* = 1.4 Hz, 1H), 5.83 (d, *J* = 1.5 Hz, 1H), 5.49 – 5.39 (m, 1H), 4.82 – 4.72 (m, 2H), 4.62 (q, *J* = 17.0 Hz, 2H), 2.83 – 2.69 (m, 2H), 2.24 (d, *J* = 1.1 Hz, 3H). **<sup>13</sup>C NMR** (100 MHz, CDCl<sub>3</sub>) δ 153.2, 152.7, 150.9, 149.1, 147.9, 142.0, 138.5, 131.3, 130.3, 128.6, 128.5, 126.8, 126.7, 123.6, 122.3, 118.5, 117.4, 114.3, 112.0, 106.9, 106.4, 104.7, 101.3, 93.2, 62.5, 47.2, 38.9, 13.9. **HRMS (ESI)** *m/z*: [M+H]<sup>+</sup> calcd for C<sub>30</sub>H<sub>26</sub>NO<sub>4</sub><sup>+</sup> 464.1856; found: 464.1854.

**5a-allyl-6-benzyl-10b-(ethylthio)-5a,10b-dihydro-6H-[1,3]dioxolo[4',5':5,6]benzofuro[2,3-*b*]indole (11f)**

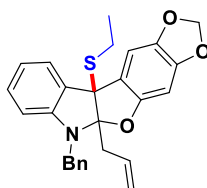

Flash column chromatography on a silica gel (petroleum ether: ethyl acetate, 20:1) afforded the product as a white solid (26.0 mg, 59% yield, *dr* = 8:1). M.p. 101 - 103 °C.

**<sup>1</sup>H NMR** (400 MHz, CDCl<sub>3</sub>) δ 7.34 (dd, *J* = 7.4, 1.3 Hz, 1H), 7.29 – 7.24 (m, 2H), 7.23 – 7.18 (m, 3H), 6.94 (td, *J* = 7.7, 1.3 Hz, 1H), 6.87 (s, 1H), 6.73 – 6.69 (m, 1H), 6.31 (s, 1H), 6.13 (d, *J* = 7.8 Hz, 1H), 5.91 – 5.83 (m, 3H), 5.20 – 5.13 (m, 1H), 5.04 – 5.00 (m, 1H), 4.66 – 4.54 (m, 2H), 3.14 – 2.99 (m, 2H), 2.29 – 2.17 (m, 2H), 1.14 (t, *J* = 7.5 Hz, 3H). **<sup>13</sup>C NMR** (100 MHz, CDCl<sub>3</sub>) δ 152.5, 148.7, 148.3, 142.3, 138.6, 132.1, 129.2, 129.0, 128.6, 126.9, 126.6, 123.4, 121.6, 118.9, 118.7, 114.2, 106.7, 104.2, 101.4, 93.1, 67.6, 47.9, 40.1, 24.5, 14.1. **HRMS (ESI)** *m/z*: [M+H]<sup>+</sup> calcd for C<sub>27</sub>H<sub>26</sub>NO<sub>3</sub>S<sup>+</sup> 444.1627; found: 444.1624.

**2-allyl-3-(4-(diallylamino)phenyl)-3-(2-hydroxy-5-methoxyphenyl)-5-methoxy-2,3**

### -dihydrobenzofuran-2-ol (12a)

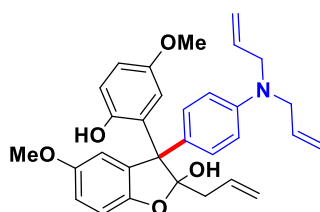

Flash column chromatography on a silica gel (petroleum ether: ethyl acetate, 10:1) afforded the product as a white solid (26.1 mg, 55% yield, *dr* > 20:1). M.p. 93 - 95 °C.

**<sup>1</sup>H NMR** (400 MHz, CDCl<sub>3</sub>) δ 7.28 (d, *J* = 2.9 Hz, 1H), 7.12 (d, *J* = 8.5 Hz, 2H), 6.92 (d, *J* = 8.7 Hz, 1H), 6.87 (dd, *J* = 8.8, 2.9 Hz, 1H), 6.82 (d, *J* = 8.4 Hz, 1H), 6.72 – 6.66 (m, 2H), 6.53 – 6.49 (m, 2H), 6.13 (s, 1H), 6.05 – 5.95 (m, 1H), 5.86 – 5.71 (m, 2H), 5.23 (dd, *J* = 10.2, 2.0 Hz, 1H), 5.15 – 5.05 (m, 5H), 4.36 (s, 1H), 3.89 – 3.81 (m, 4H), 3.76 (s, 3H), 3.69 (s, 3H), 2.46 (dd, *J* = 14.1, 5.6 Hz, 1H), 1.92 (dd, *J* = 14.1, 8.6 Hz, 1H). **<sup>13</sup>C NMR** (100 MHz, CDCl<sub>3</sub>) δ 154.3, 153.1, 149.9, 149.8, 147.9, 135.1, 133.9, 132.1, 128.2, 127.2, 125.1, 121.3, 118.3, 116.2, 115.9, 113.8, 113.5, 113.4, 112.1, 111.9, 110.9, 64.7, 55.9, 55.7, 52.5, 42.7. **HRMS (ESI) m/z:** [M+H]<sup>+</sup> calcd for C<sub>31</sub>H<sub>34</sub>NO<sub>5</sub><sup>+</sup> 500.2431; found: 500.2433.

### 6-(1-benzyl-3-(4-(diallylamino)phenyl)-2-oxoindolin-3-yl)benzo[d][1,3]dioxol-5-yl trifluoromethanesulfonate (13)

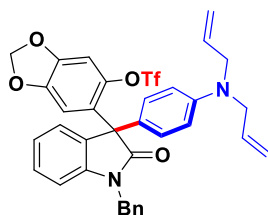

Flash column chromatography on a silica gel (petroleum ether: ethyl acetate, 15:1) afforded the product as a white solid (48.3 mg, 73% yield). M.p. 186 - 188 °C.

**<sup>1</sup>H NMR** (500 MHz, CDCl<sub>3</sub>) δ 7.27 – 7.17 (m, 5H), 7.07 (t, *J* = 4.2 Hz, 5H), 6.82 (s, 1H), 6.76 (d, *J* = 7.8 Hz, 1H), 6.70 (d, *J* = 11.2 Hz, 3H), 6.04 (q, *J* = 1.5 Hz, 2H), 5.93 – 5.85 (m, 2H), 5.47 (d, *J* = 16.1 Hz, 1H), 5.23 – 5.17 (m, 4H), 4.49 (d, *J* = 16.1 Hz, 1H), 3.96 (dd, *J* = 4.9, 2.5 Hz, 4H). **<sup>13</sup>C NMR** (125 MHz, CDCl<sub>3</sub>) δ 177.6, 148.3, 147.6, 146.4, 142.9, 142.5, 136.2, 133.7, 131.2, 129.9, 128.6, 128.5, 128.5, 127.2, 126.8, 125.4, 118.3(q, *J* = 318.8), 116.2, 112.2, 111.4, 110.0, 102.5, 102.1, 102.1, 58.7, 52.8, 43.7. **HRMS (ESI) m/z:** [M+H]<sup>+</sup> calcd for C<sub>35</sub>H<sub>30</sub>F<sub>3</sub>N<sub>2</sub>O<sub>6</sub>S<sup>+</sup> 663.1771; found: 663.1773.

### 2,2'-((4-(diallylamino)phenyl)methylene)bis(4-methoxyphenol) (14)

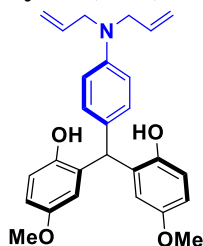

Flash column chromatography on a silica gel (petroleum ether: ethyl acetate, 5:1) afforded the product as a white solid (26.2 mg, 61% yield). M.p. 106 - 108 °C.

**<sup>1</sup>H NMR** (500 MHz, CDCl<sub>3</sub>) δ 6.93 – 6.88 (m, 2H), 6.68 (d, *J* = 8.7 Hz, 2H), 6.63 – 6.53 (m, 4H), 6.41 (d, *J* = 3.0 Hz, 2H), 5.81 – 5.72 (m, 2H), 5.60 (s, 1H), 5.12 – 5.03 (m, 4H), 4.80 (s, 2H), 3.86 – 3.77 (m, 4H), 3.59 (s, 6H). **<sup>13</sup>C NMR** (100 MHz, CDCl<sub>3</sub>) δ 153.81, 147.89, 147.54, 133.96, 130.56, 129.90, 127.10, 117.02, 116.21, 116.13, 112.67, 112.27, 55.59, 52.76, 44.41. **HRMS (ESI) m/z:** [M+H]<sup>+</sup> calcd for C<sub>27</sub>H<sub>30</sub>NO<sub>4</sub><sup>+</sup> 432.2169; found: 432.2167.

## Reference

1. Shi, H.; Wang, L.; Li, S.-S.; Liu, Y.; Xu, L. *Org. Chem. Front.* **2020**, *7*, 747-755.

## 6. Crystal Structures and Data

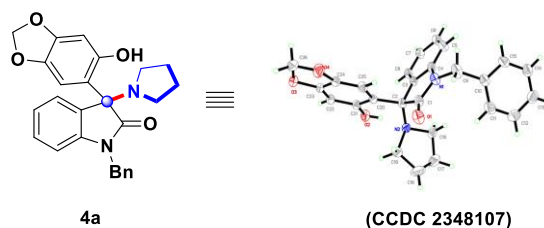

Table S2. Crystal data and structure refinement for **4a**.

|                                   |                                                                                                                            |
|-----------------------------------|----------------------------------------------------------------------------------------------------------------------------|
| Identification code               | <b>4a</b>                                                                                                                  |
| Empirical formula                 | C <sub>26</sub> H <sub>23</sub> N <sub>2</sub> O <sub>4</sub>                                                              |
| Formula weight                    | 427.46                                                                                                                     |
| Temperature                       | 298(2) K                                                                                                                   |
| Wavelength                        | 0.71073 Å                                                                                                                  |
| Crystal system, space group       | Monoclinic, P2(1)/n                                                                                                        |
| Unit cell dimensions              | a = 10.8116(11) Å    alpha = 90 deg.<br>b = 14.9897(14) Å    beta = 94.585(3) deg.<br>c = 13.0257(12) Å    gamma = 90 deg. |
| Volume                            | 2104.2(3) Å <sup>3</sup>                                                                                                   |
| Z, Calculated density             | 4, 1.349 Mg/m <sup>3</sup>                                                                                                 |
| Absorption coefficient            | 0.092 mm <sup>-1</sup>                                                                                                     |
| F(000)                            | 900                                                                                                                        |
| Crystal size                      | 0.410 x 0.370 x 0.350 mm                                                                                                   |
| Theta range for data collection   | 2.075 to 25.007 deg.                                                                                                       |
| Limiting indices                  | -12 ≤ h ≤ 12, -17 ≤ k ≤ 13, -15 ≤ l ≤ 15                                                                                   |
| Reflections collected / unique    | 9970 / 3690 [R(int) = 0.0448]                                                                                              |
| Completeness to theta = 25.007    | 99.4 %                                                                                                                     |
| Refinement method                 | Full-matrix least-squares on F <sup>2</sup>                                                                                |
| Data / restraints / parameters    | 3690 / 36 / 290                                                                                                            |
| Goodness-of-fit on F <sup>2</sup> | 1.029                                                                                                                      |
| Final R indices [I > 2σ(I)]       | R1 = 0.0551, wR2 = 0.1398                                                                                                  |
| R indices (all data)              | R1 = 0.0903, wR2 = 0.1568                                                                                                  |
| Extinction coefficient            | 0.0187(18)                                                                                                                 |
| Largest diff. peak and hole       | 0.434 and -0.288 e.Å <sup>-3</sup>                                                                                         |

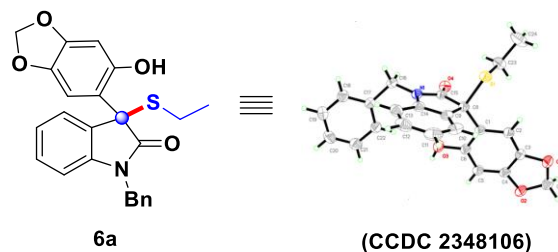

Table S3. Crystal data and structure refinement for **6a**.

|                                   |                                                                                                                        |
|-----------------------------------|------------------------------------------------------------------------------------------------------------------------|
| Identification code               | <b>6a</b>                                                                                                              |
| Empirical formula                 | C <sub>25</sub> H <sub>25</sub> NO <sub>5</sub> S                                                                      |
| Formula weight                    | 451.52                                                                                                                 |
| Temperature                       | 293(2) K                                                                                                               |
| Wavelength                        | 1.54184 Å                                                                                                              |
| Crystal system, space group       | Monoclinic, P2(1)/c                                                                                                    |
| Unit cell dimensions              | a = 12.9521(5) Å    alpha = 90 deg.<br>b = 19.0400(8) Å    beta = 96.104(4) deg.<br>c = 9.3837(5) Å    gamma = 90 deg. |
| Volume                            | 2300.97(18) Å <sup>3</sup>                                                                                             |
| Z, Calculated density             | 4, 1.303 Mg/m <sup>3</sup>                                                                                             |
| Absorption coefficient            | 1.552 mm <sup>-1</sup>                                                                                                 |
| F(000)                            | 952                                                                                                                    |
| Crystal size                      | 0.120 x 0.120 x 0.110 mm                                                                                               |
| Theta range for data collection   | 3.432 to 67.244 deg.                                                                                                   |
| Limiting indices                  | -14 ≤ h ≤ 15, -22 ≤ k ≤ 19, -8 ≤ l ≤ 11                                                                                |
| Reflections collected / unique    | 8265 / 4108 [R(int) = 0.0219]                                                                                          |
| Completeness to theta = 67.244    | 99.8 %                                                                                                                 |
| Refinement method                 | Full-matrix least-squares on F <sup>2</sup>                                                                            |
| Data / restraints / parameters    | 4108 / 0 / 293                                                                                                         |
| Goodness-of-fit on F <sup>2</sup> | 1.034                                                                                                                  |
| Final R indices [I > 2σ(I)]       | R1 = 0.0419, wR2 = 0.1046                                                                                              |
| R indices (all data)              | R1 = 0.0548, wR2 = 0.1134                                                                                              |
| Extinction coefficient            | n/a                                                                                                                    |
| Largest diff. peak and hole       | 0.161 and -0.172 e.Å <sup>-3</sup>                                                                                     |



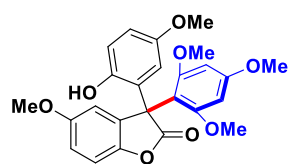

**8a**

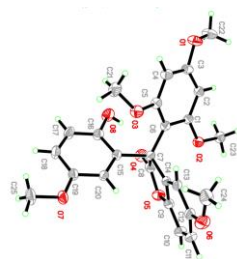

(CCDC 2348105)

Table S4. Crystal data and structure refinement for **8a**.

|                                   |                                                                                                                                      |
|-----------------------------------|--------------------------------------------------------------------------------------------------------------------------------------|
| Identification code               | <b>8a</b>                                                                                                                            |
| Empirical formula                 | C <sub>33</sub> H <sub>28</sub> N <sub>2</sub> O <sub>5</sub>                                                                        |
| Formula weight                    | 532.57                                                                                                                               |
| Temperature                       | 139(2) K                                                                                                                             |
| Wavelength                        | 1.54184 Å                                                                                                                            |
| Crystal system, space group       | Triclinic, P-1                                                                                                                       |
| Unit cell dimensions              | a = 9.8268(5) Å    alpha = 79.621(4) deg.<br>b = 12.1370(6) Å    beta = 68.485(5) deg.<br>c = 12.7460(6) Å    gamma = 66.793(5) deg. |
| Volume                            | 1298.70(13) Å <sup>3</sup>                                                                                                           |
| Z, Calculated density             | 2, 1.362 Mg/m <sup>3</sup>                                                                                                           |
| Absorption coefficient            | 0.747 mm <sup>-1</sup>                                                                                                               |
| F(000)                            | 560                                                                                                                                  |
| Crystal size                      | 0.220 x 0.210 x 0.210 mm                                                                                                             |
| Theta range for data collection   | 3.731 to 67.244 deg.                                                                                                                 |
| Limiting indices                  | -7 ≤ h ≤ 11, -11 ≤ k ≤ 14, -14 ≤ l ≤ 15                                                                                              |
| Reflections collected / unique    | 8360 / 4655 [R(int) = 0.0177]                                                                                                        |
| Completeness to theta = 67.244    | 99.7 %                                                                                                                               |
| Refinement method                 | Full-matrix least-squares on F <sup>2</sup>                                                                                          |
| Data / restraints / parameters    | 4655 / 362 / 426                                                                                                                     |
| Goodness-of-fit on F <sup>2</sup> | 1.030                                                                                                                                |
| Final R indices [I > 2σ(I)]       | R1 = 0.0722, wR2 = 0.1891                                                                                                            |
| R indices (all data)              | R1 = 0.0817, wR2 = 0.1993                                                                                                            |
| Extinction coefficient            | n/a                                                                                                                                  |
| Largest diff. peak and hole       | 0.413 and -0.388 e.Å <sup>-3</sup>                                                                                                   |

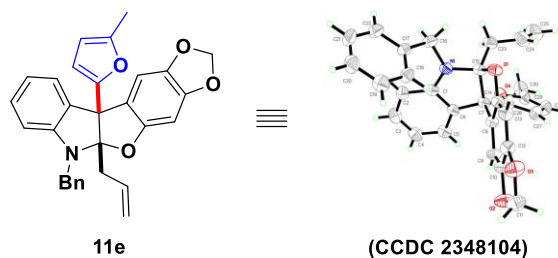

Table S5. Crystal data and structure refinement for **11e**.

|                                   |                                                                                                                                      |
|-----------------------------------|--------------------------------------------------------------------------------------------------------------------------------------|
| Identification code               | <b>11e</b>                                                                                                                           |
| Empirical formula                 | C <sub>30</sub> H <sub>25</sub> NO <sub>4</sub>                                                                                      |
| Formula weight                    | 463.51                                                                                                                               |
| Temperature                       | 273(2) K                                                                                                                             |
| Wavelength                        | 0.71073 Å                                                                                                                            |
| Crystal system, space group       | Triclinic, P-1                                                                                                                       |
| Unit cell dimensions              | a = 8.7819(5) Å    alpha = 97.784(2) deg.<br>b = 10.3472(6) Å    beta = 97.527(2) deg.<br>c = 13.4614(8) Å    gamma = 91.588(2) deg. |
| Volume                            | 1200.21(12) Å <sup>3</sup>                                                                                                           |
| Z, Calculated density             | 2, 1.283 Mg/m <sup>3</sup>                                                                                                           |
| Absorption coefficient            | 0.085 mm <sup>-1</sup>                                                                                                               |
| F(000)                            | 488                                                                                                                                  |
| Crystal size                      | 0.230 x 0.210 x 0.200 mm                                                                                                             |
| Theta range for data collection   | 2.342 to 25.016 deg.                                                                                                                 |
| Limiting indices                  | -10 ≤ h ≤ 10, -12 ≤ k ≤ 12, -16 ≤ l ≤ 16                                                                                             |
| Reflections collected / unique    | 17738 / 4221 [R(int) = 0.0473]                                                                                                       |
| Completeness to theta = 25.016    | 99.6 %                                                                                                                               |
| Refinement method                 | Full-matrix least-squares on F <sup>2</sup>                                                                                          |
| Data / restraints / parameters    | 4221 / 0 / 317                                                                                                                       |
| Goodness-of-fit on F <sup>2</sup> | 1.151                                                                                                                                |
| Final R indices [I > 2σ(I)]       | R1 = 0.0792, wR2 = 0.1382                                                                                                            |
| R indices (all data)              | R1 = 0.1261, wR2 = 0.1627                                                                                                            |
| Extinction coefficient            | n/a                                                                                                                                  |
| Largest diff. peak and hole       | 0.300 and -0.209 e.Å <sup>-3</sup>                                                                                                   |

## 7. <sup>1</sup>H and <sup>13</sup>C NMR Spectra

### 1-benzyl-3-(4-(diallylamino)phenyl)-3-(6-hydroxybenzo[d][1,3]dioxol-5-yl)indolin-2-one (3a)

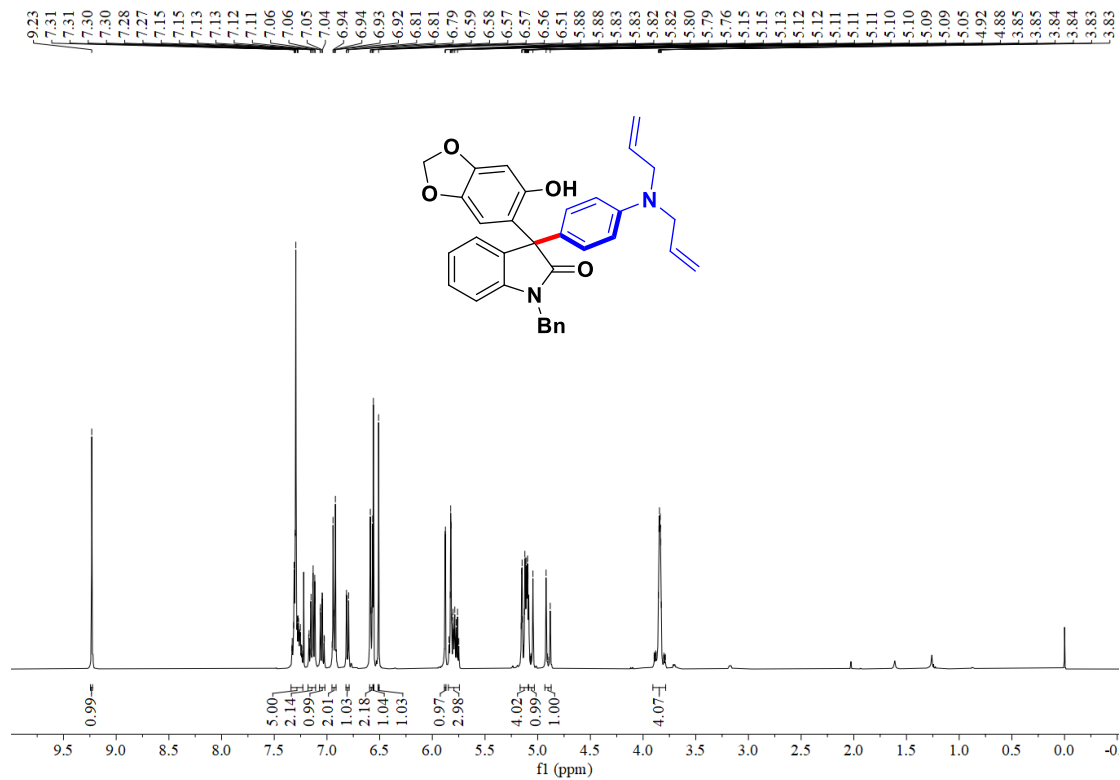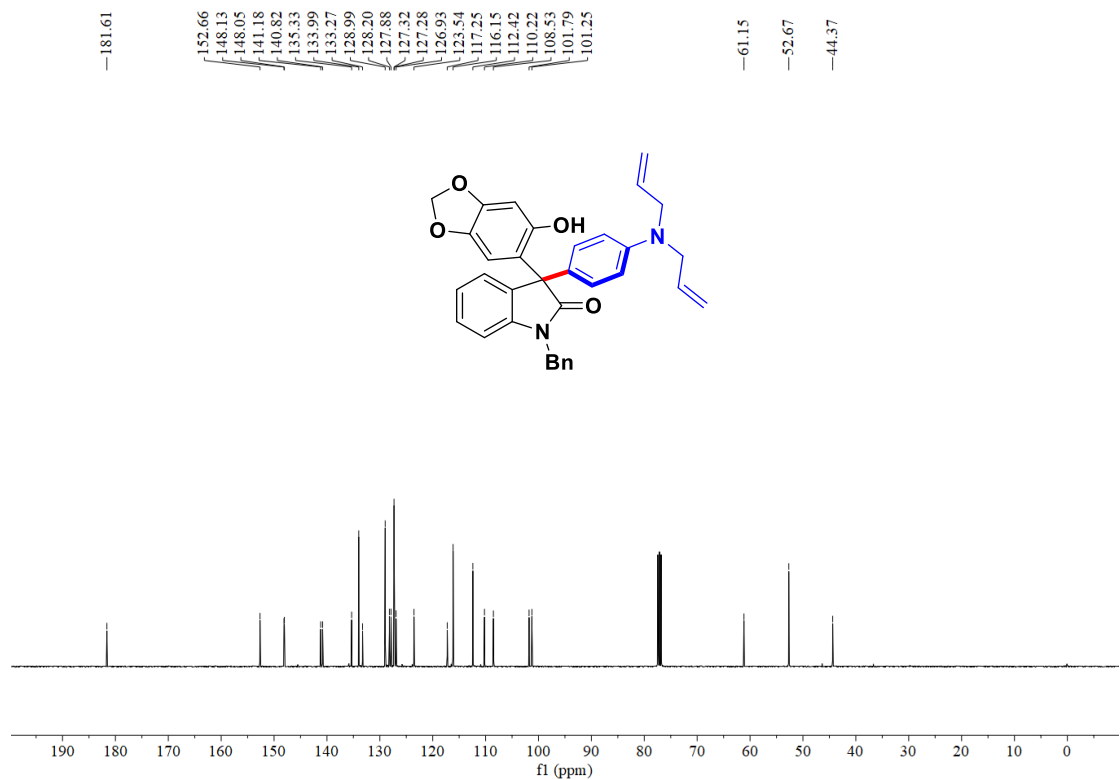

**1-benzyl-3-(4-(di(prop-2-yn-1-yl)amino)phenyl)-3-(6-hydroxybenzo[d][1,3]dioxol-5-yl)indolin-2-one (3b)**

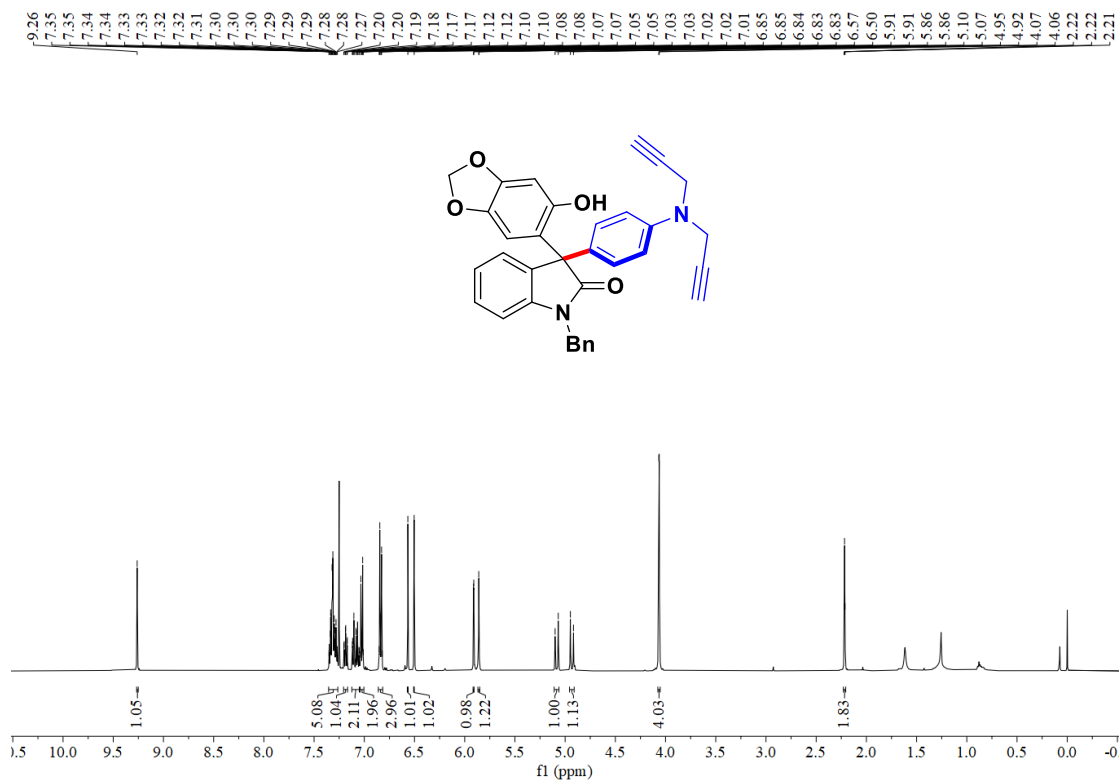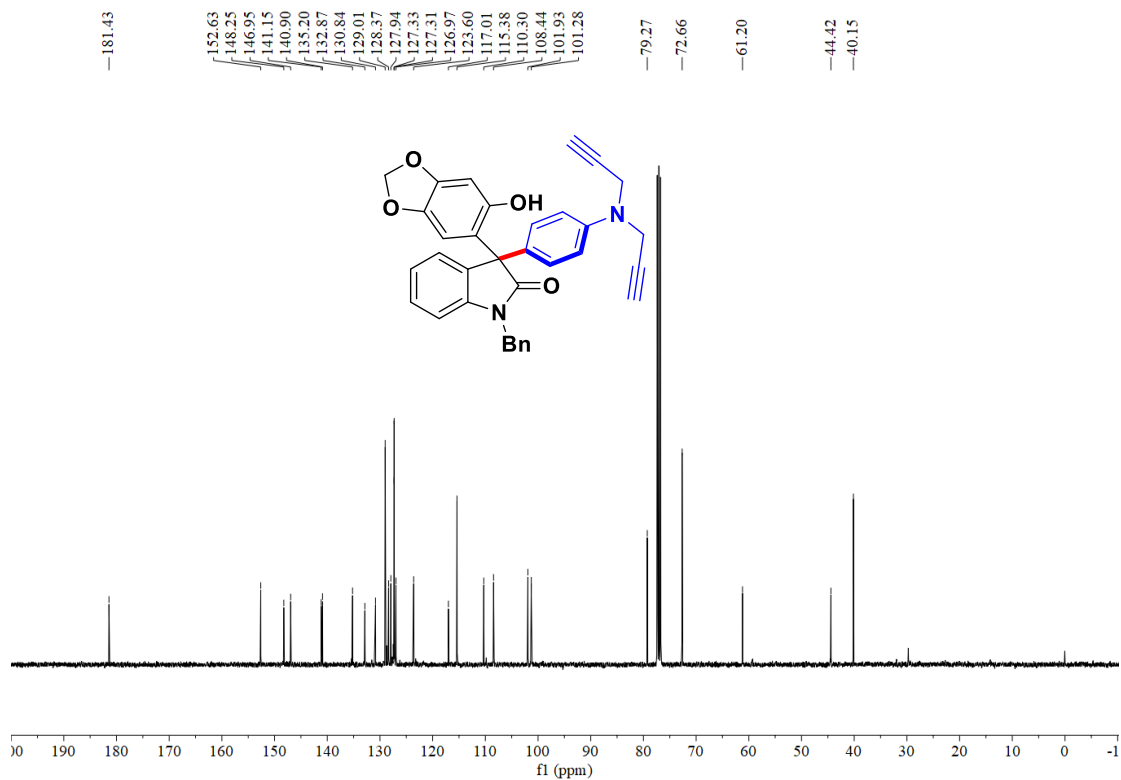

**1-benzyl-3-(6-hydroxybenzo[d][1,3]dioxol-5-yl)-3-(4-(pyrrolidin-1-yl)phenyl)indolin-2-one (3c)**

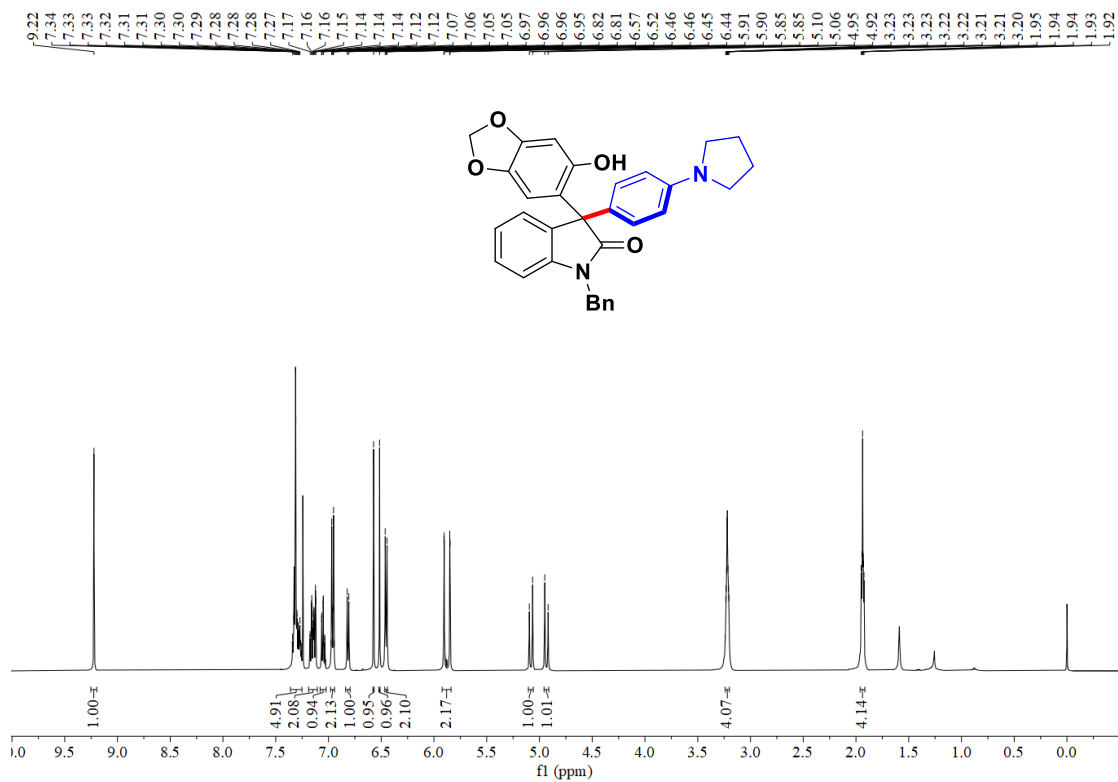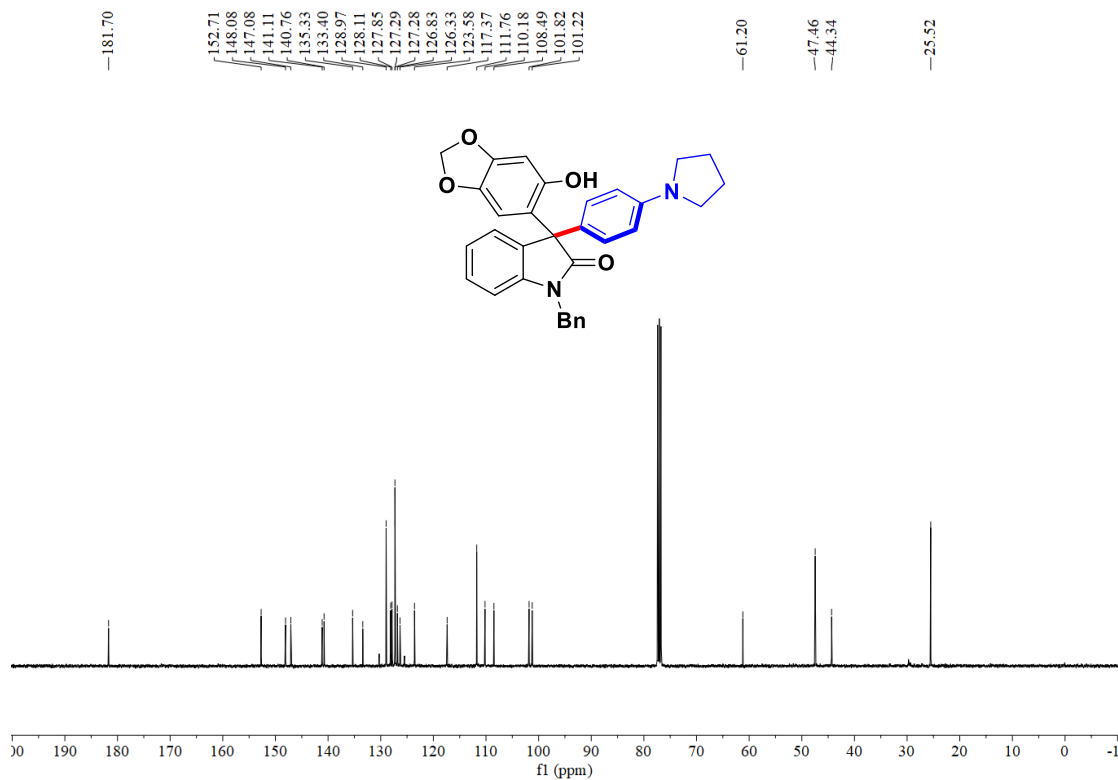

**3-(4-aminophenyl)-1-benzyl-3-(6-hydroxybenzo[d][1,3]dioxol-5-yl)indolin-2-one  
(3d)**

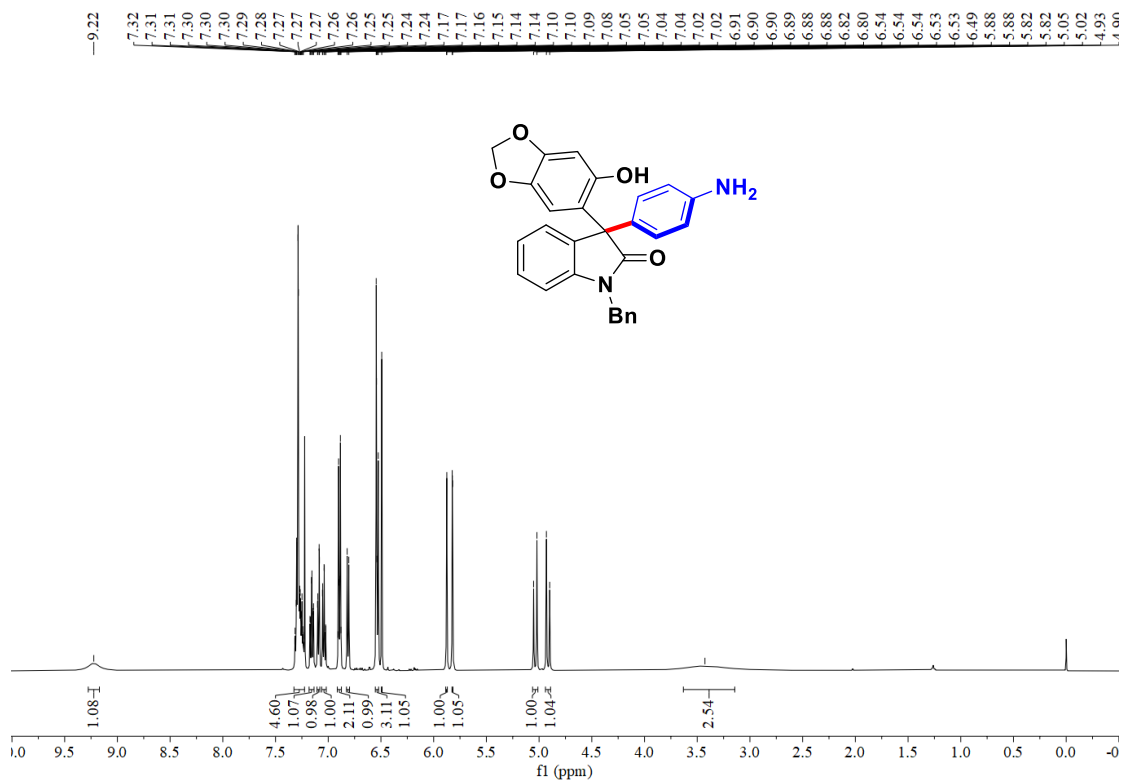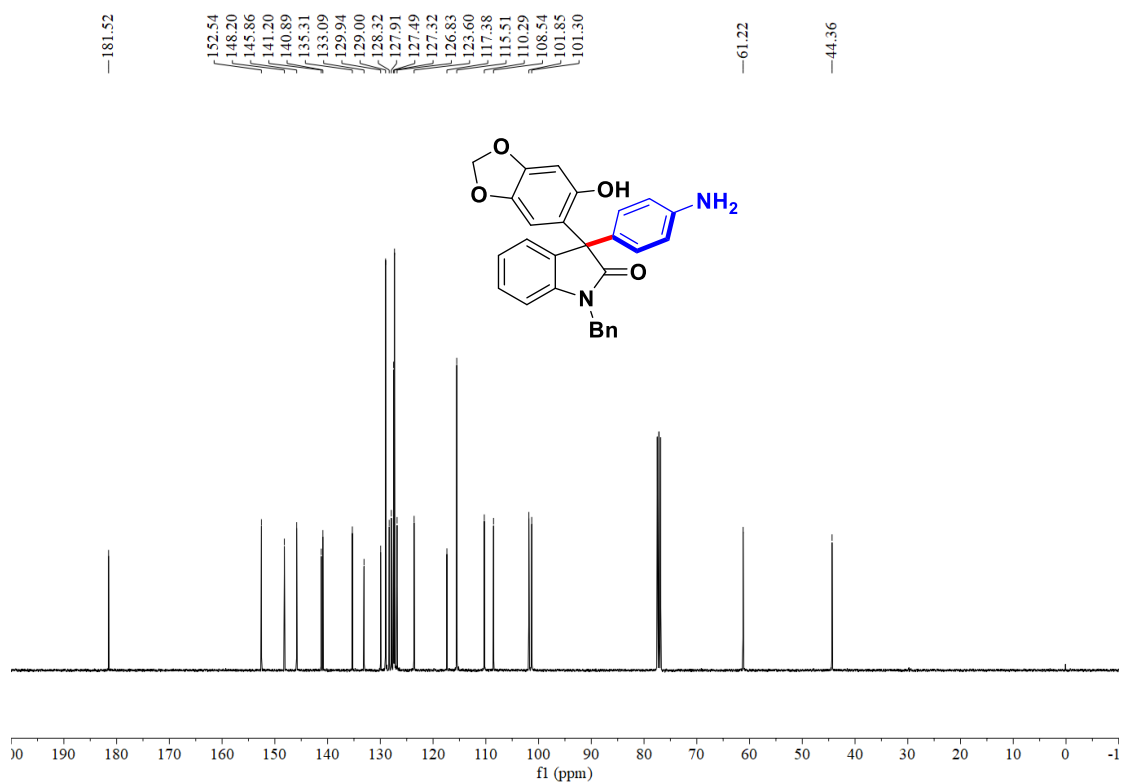

**3-(4-amino-2,5-dimethoxyphenyl)-1-benzyl-3-(6-hydroxybenzo[d][1,3]dioxol-5-yl)indolin-2-one (3e)**

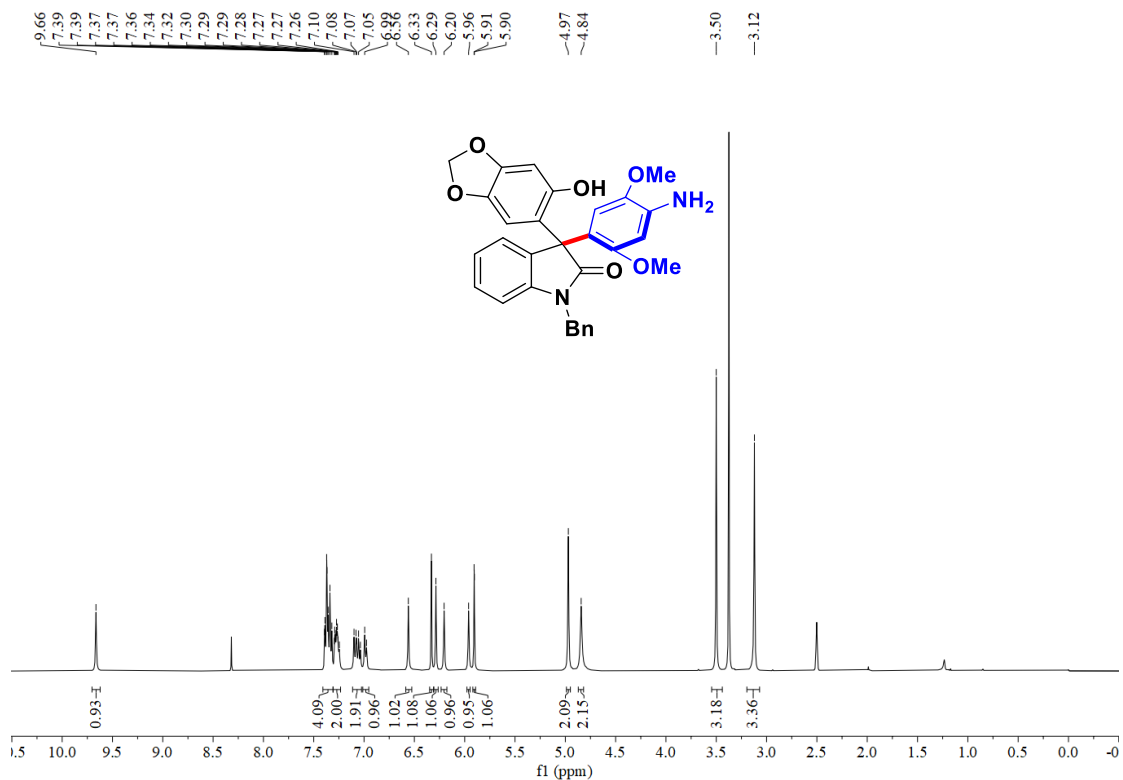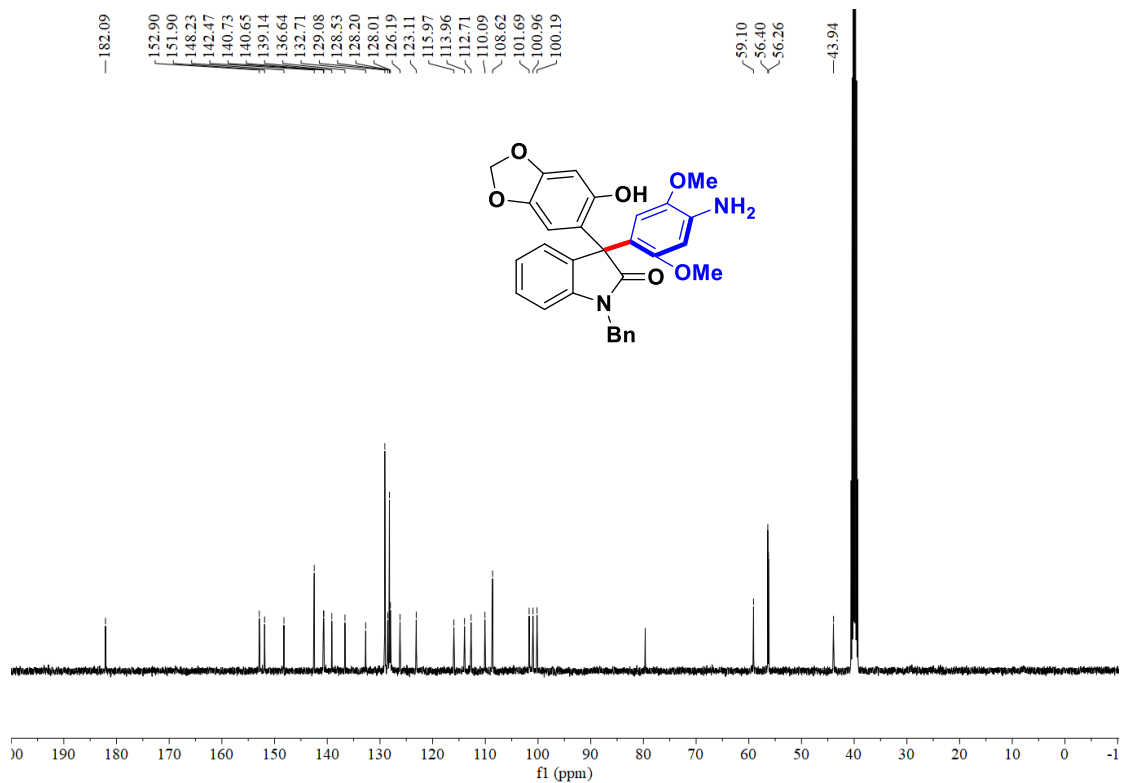

**3-(4-amino-5-bromo-2-chlorophenyl)-1-benzyl-3-(6-hydroxybenzo[d][1,3]dioxol-5-yl)indolin-2-one (3f)**

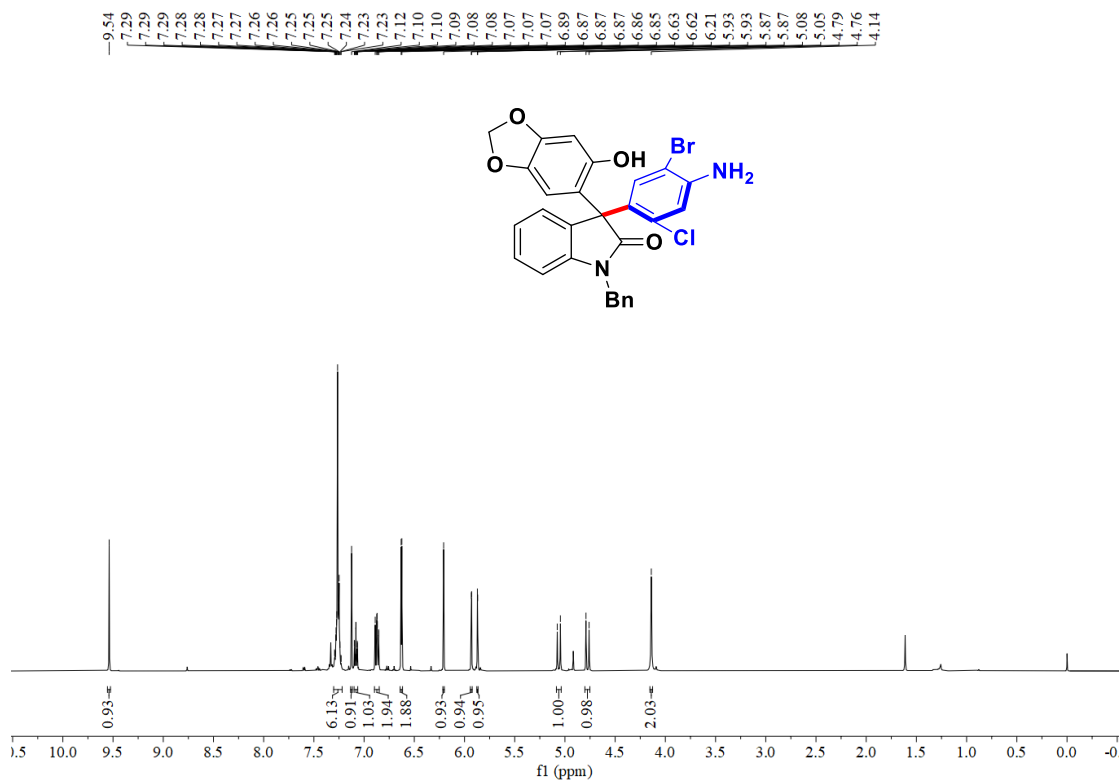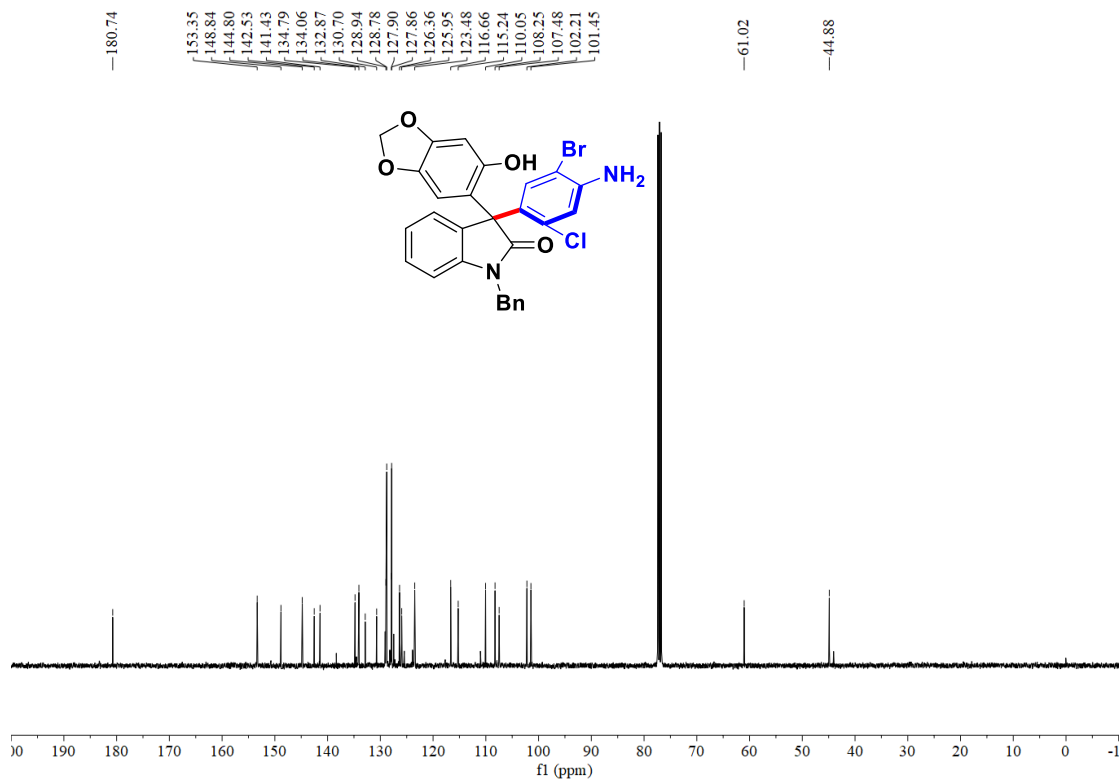



**3-(4-amino-3-nitrophenyl)-1-benzyl-3-(6-hydroxybenzo[d][1,3]dioxol-5-yl)indolin-2-one (3g)**

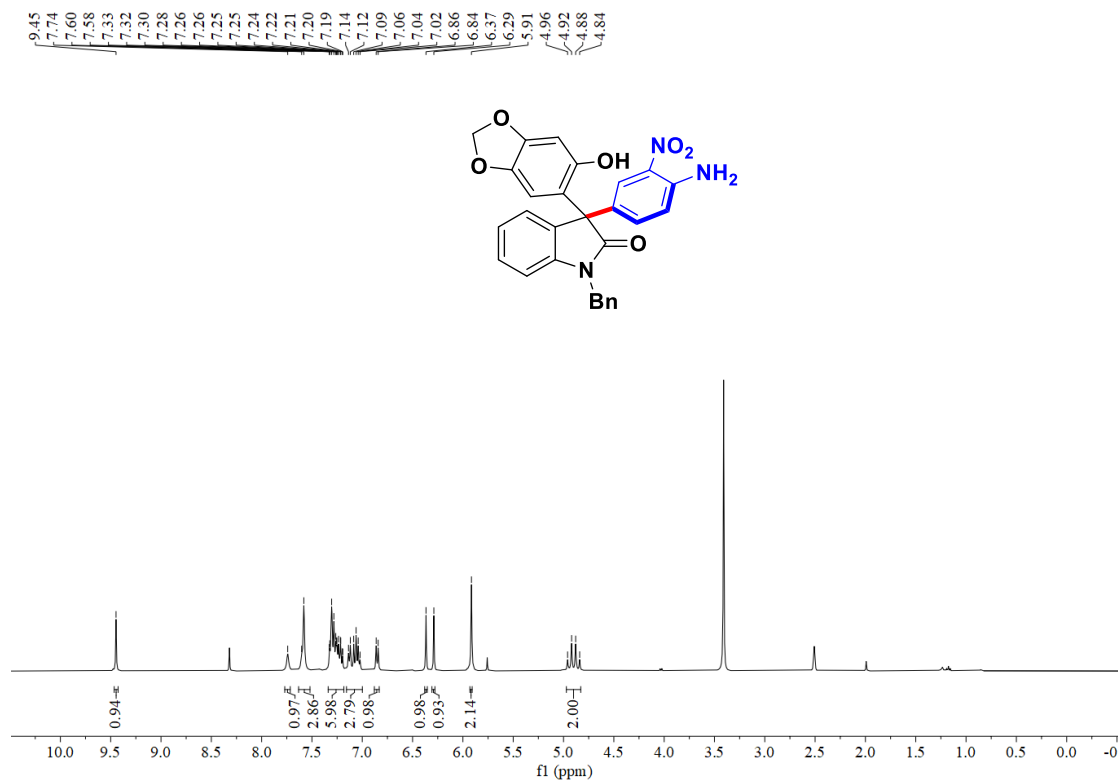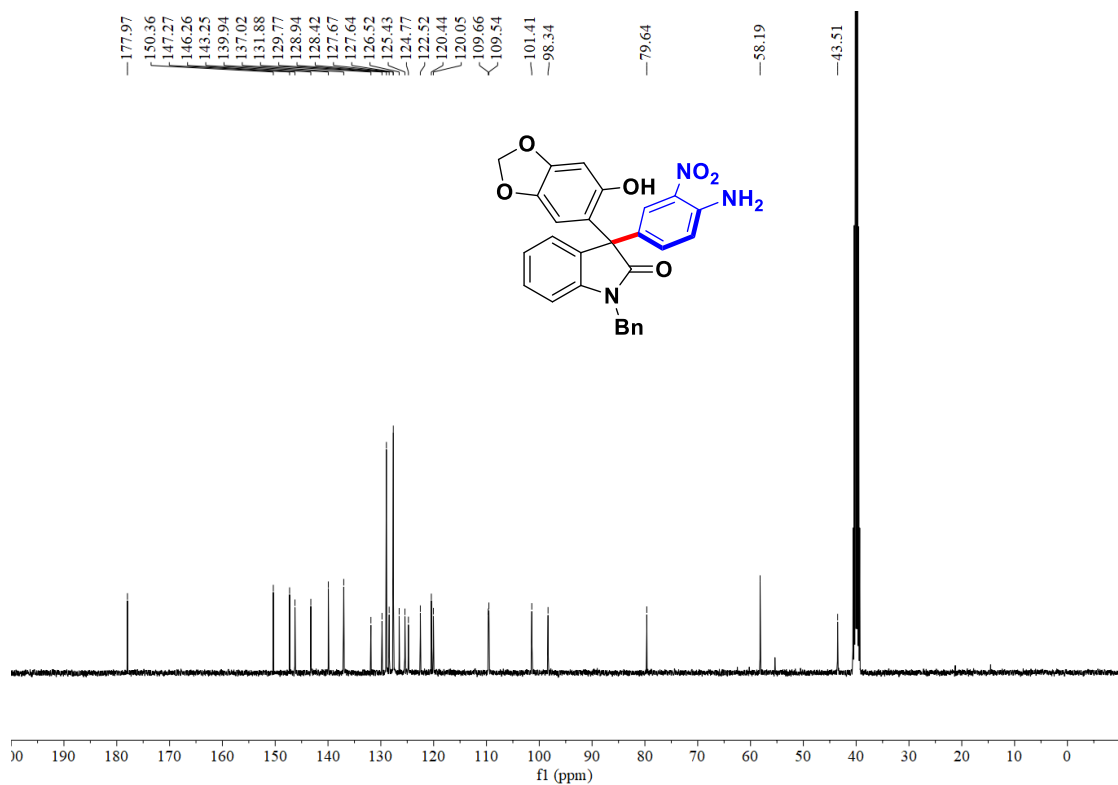

**1-benzyl-3-(6-hydroxybenzo[*d*][1,3]dioxol-5-yl)-3-(2,4,6-trimethoxyphenyl)indolin-2-one (3h)**

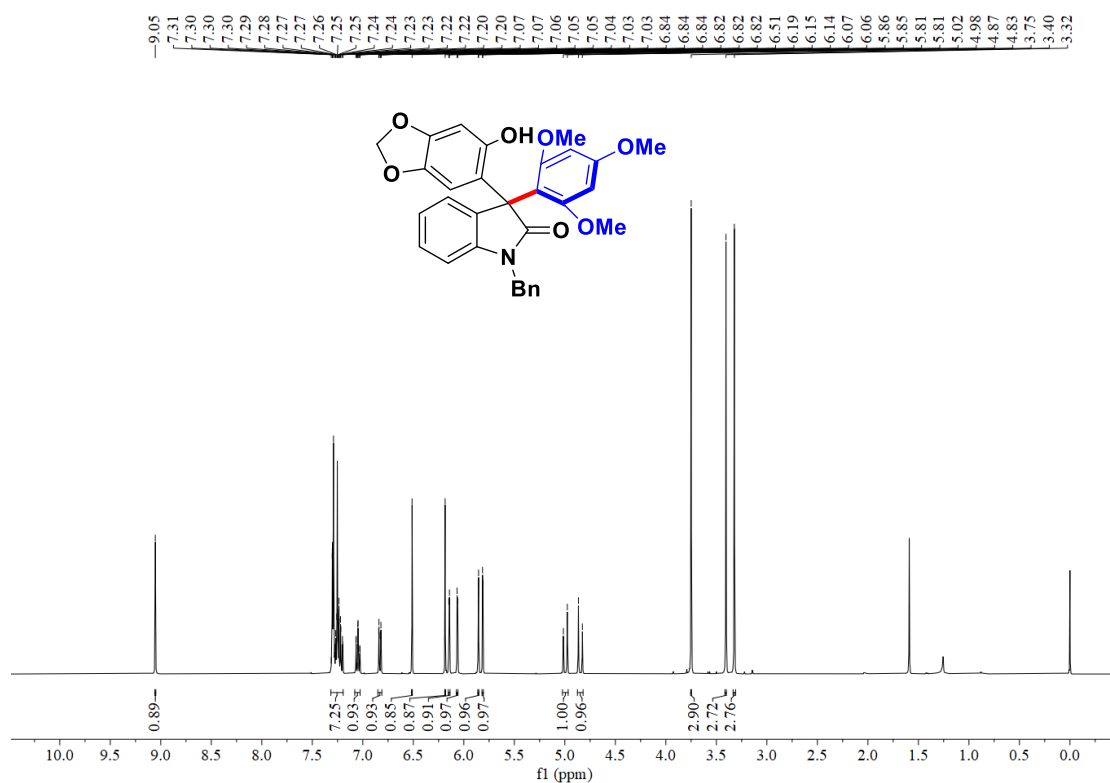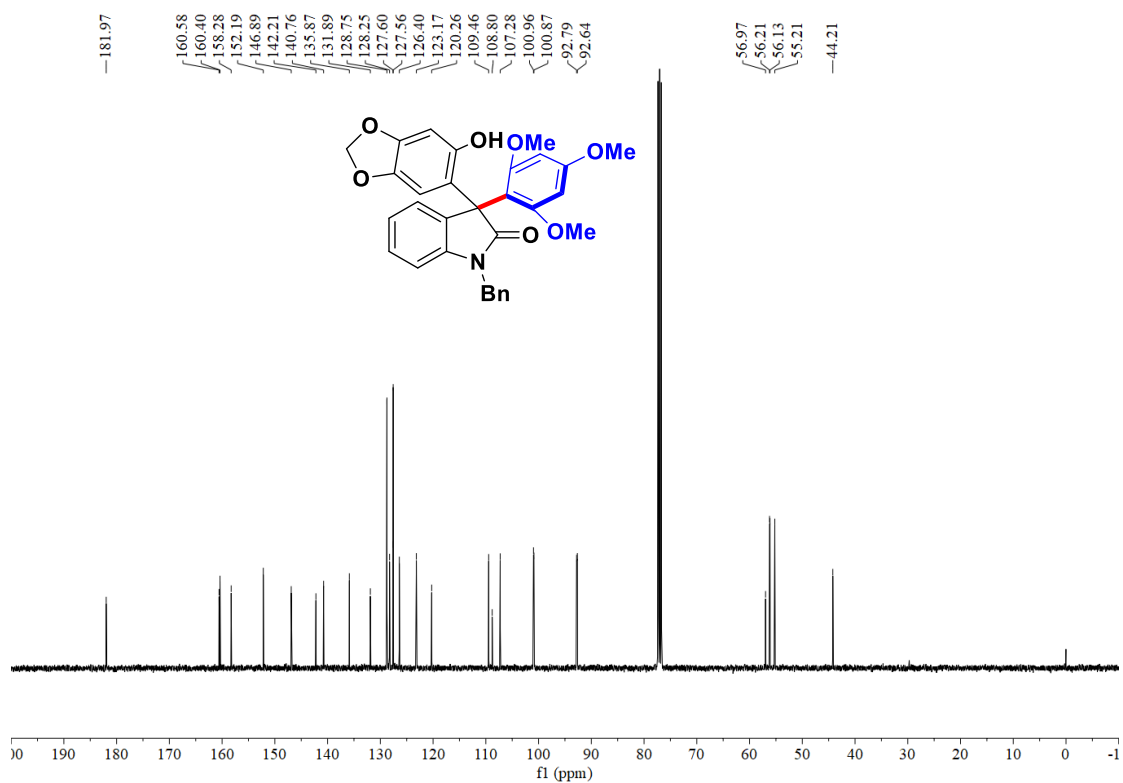

# 1-benzyl-3,3-bis(6-hydroxybenzo[*d*][1,3]dioxol-5-yl)indolin-2-one (3i)

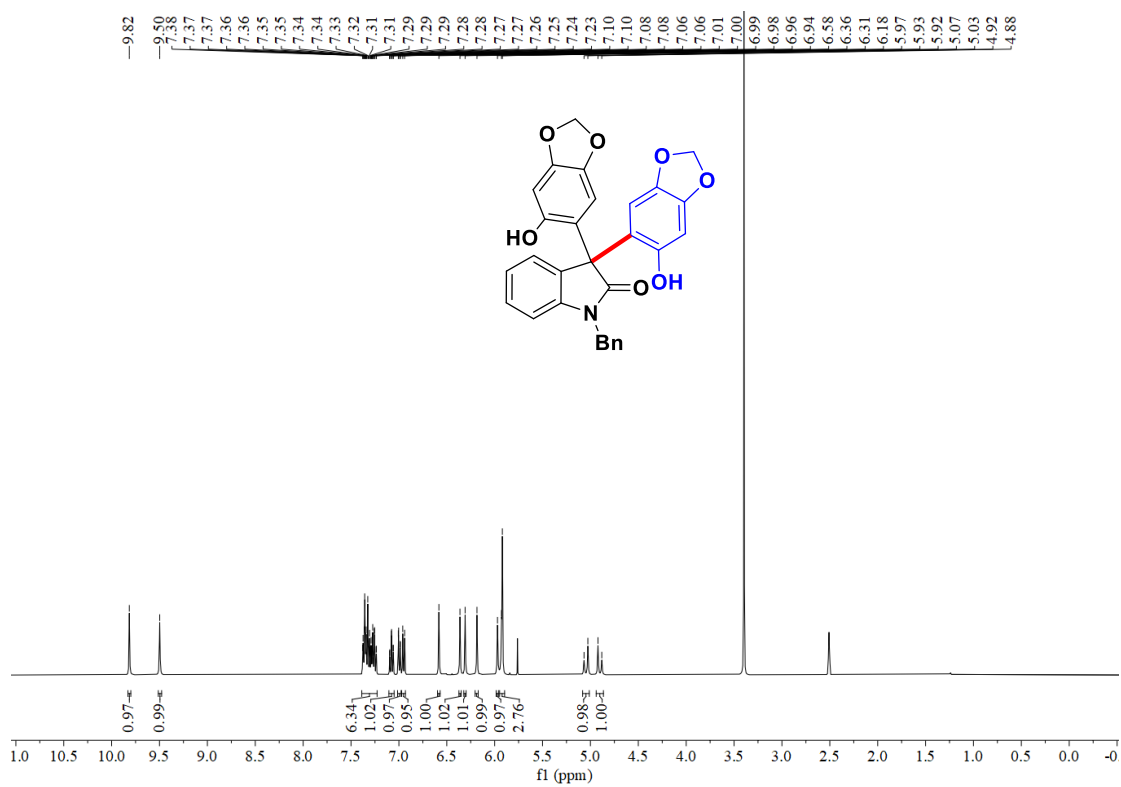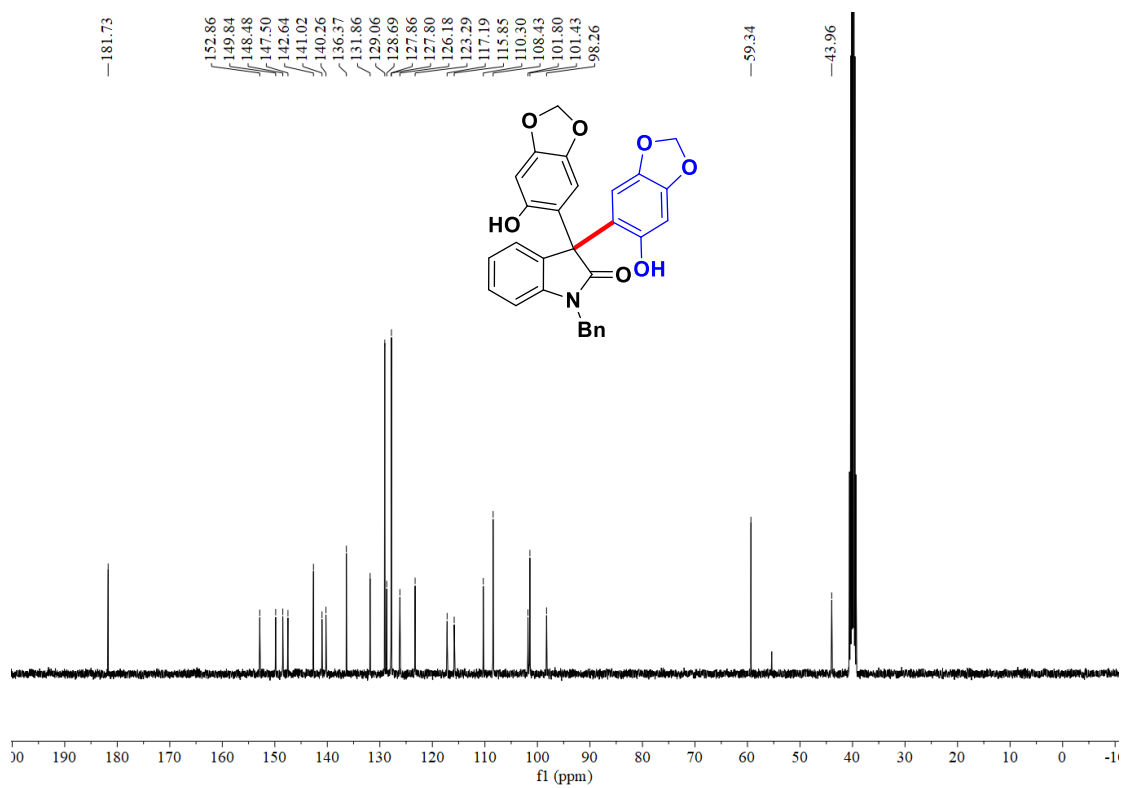

**1-benzyl-3-(6-hydroxybenzo[d][1,3]dioxol-5-yl)-3-(1*H*-indol-3-yl)indolin-2-one**  
**(3j)**

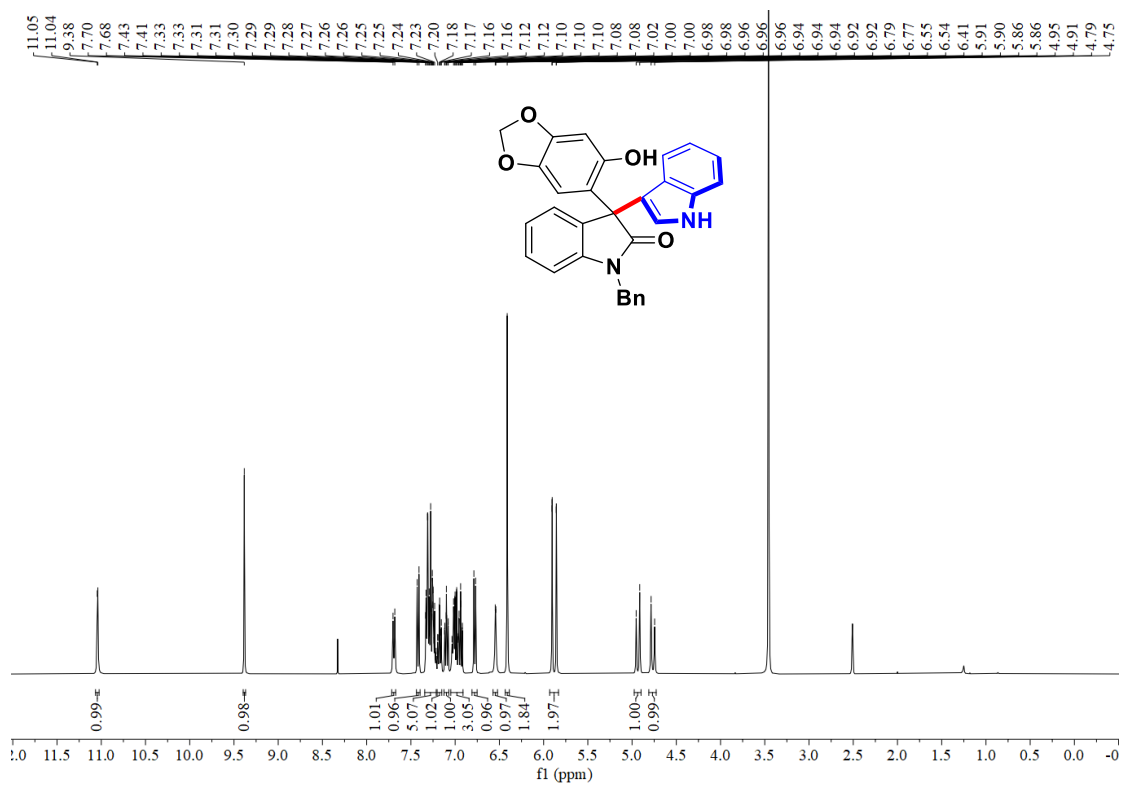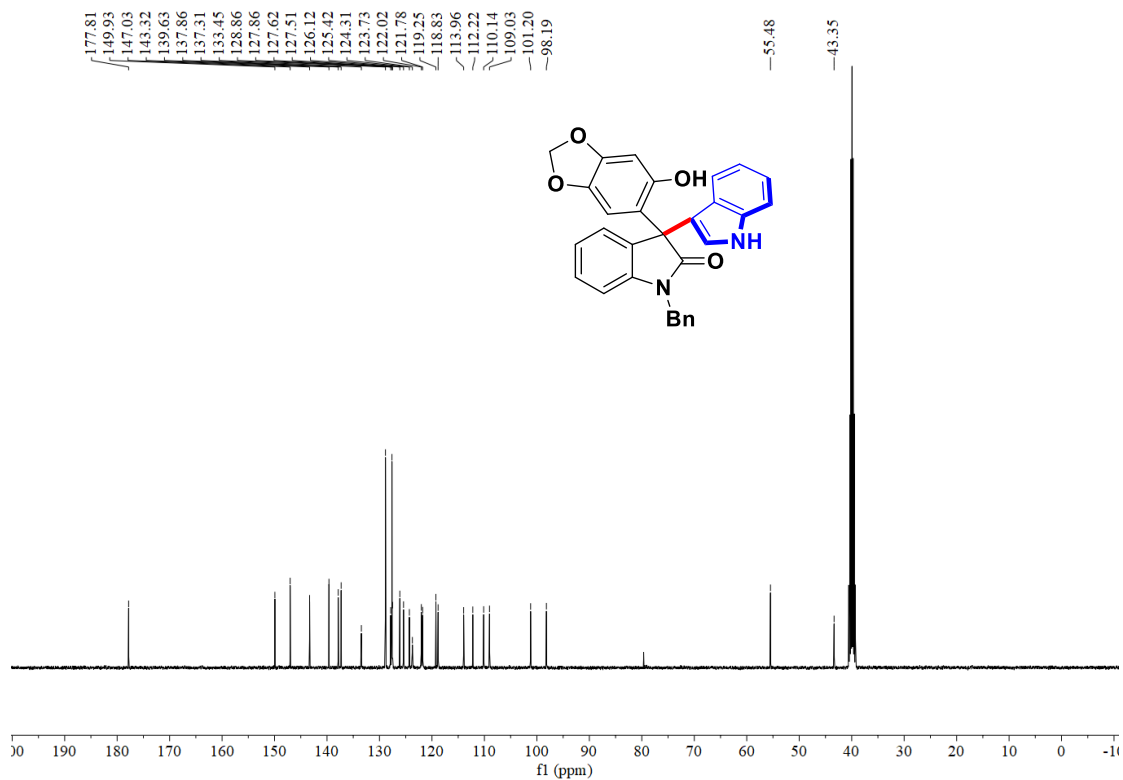

**1-benzyl-3-(6-hydroxybenzo[d][1,3]dioxol-5-yl)-3-(1*H*-pyrrol-2-yl)indolin-2-one  
(3k)**

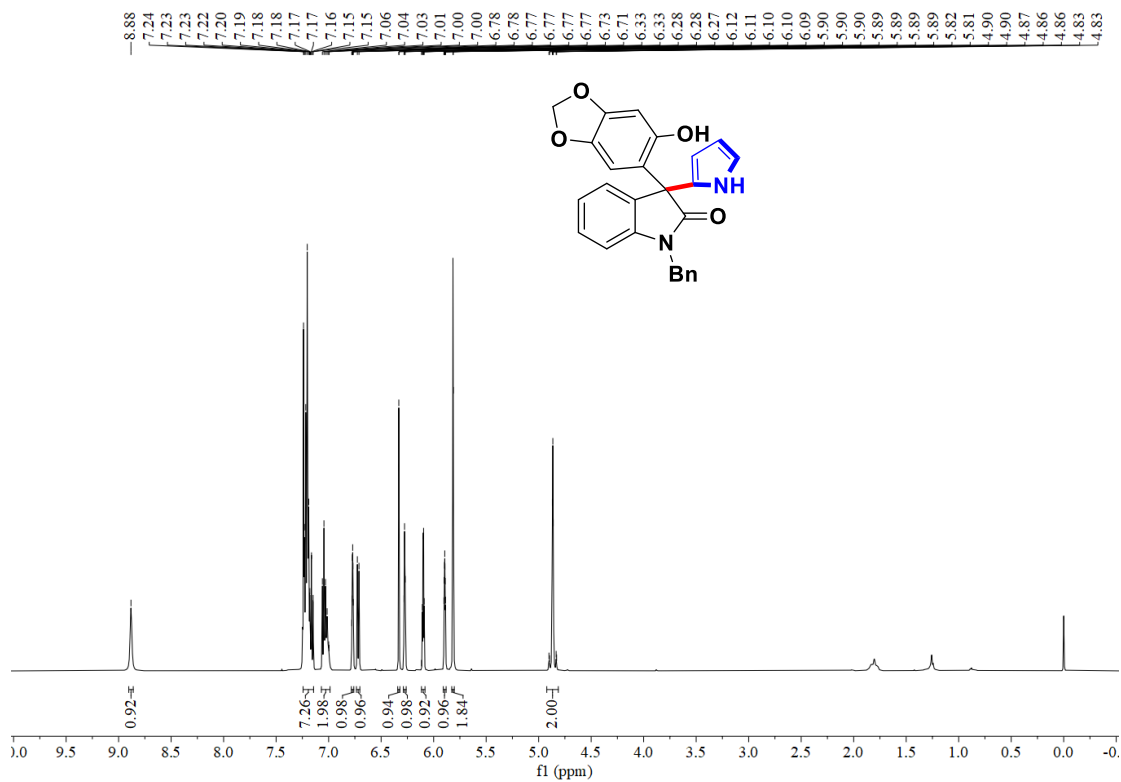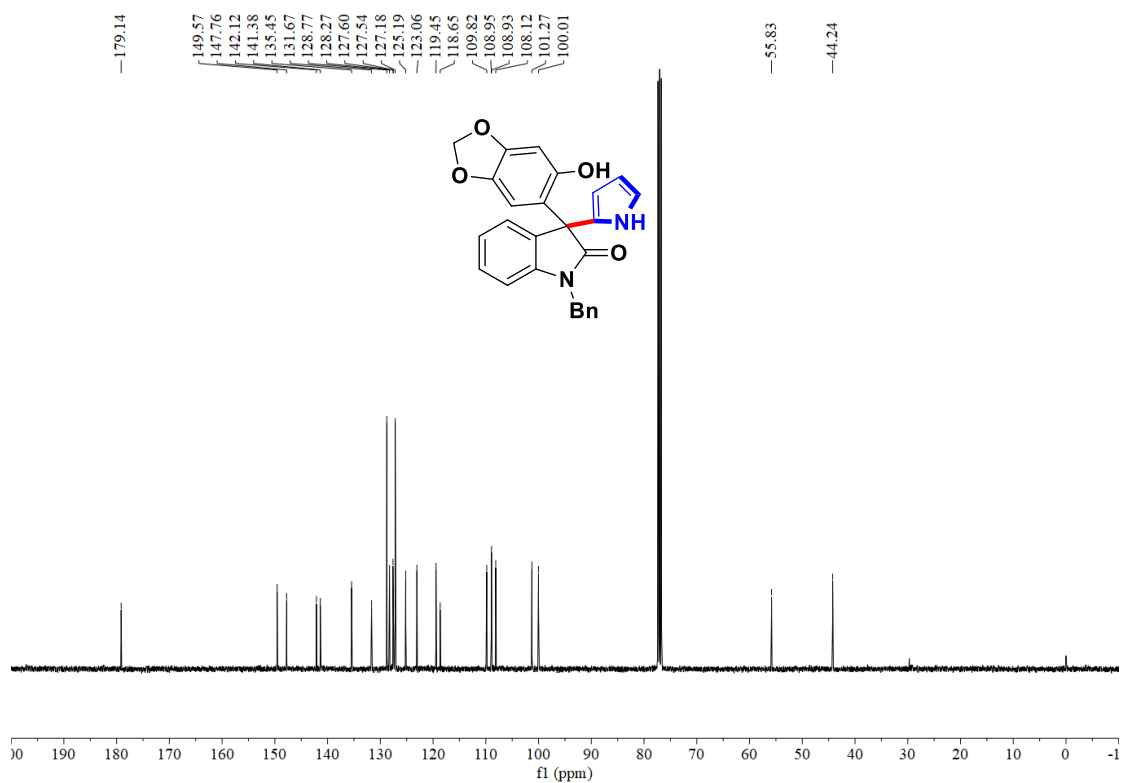

**1-benzyl-3-(6-hydroxybenzo[d][1,3]dioxol-5-yl)-3-(5-methylfuran-2-yl)indolin-2-one (3l)**

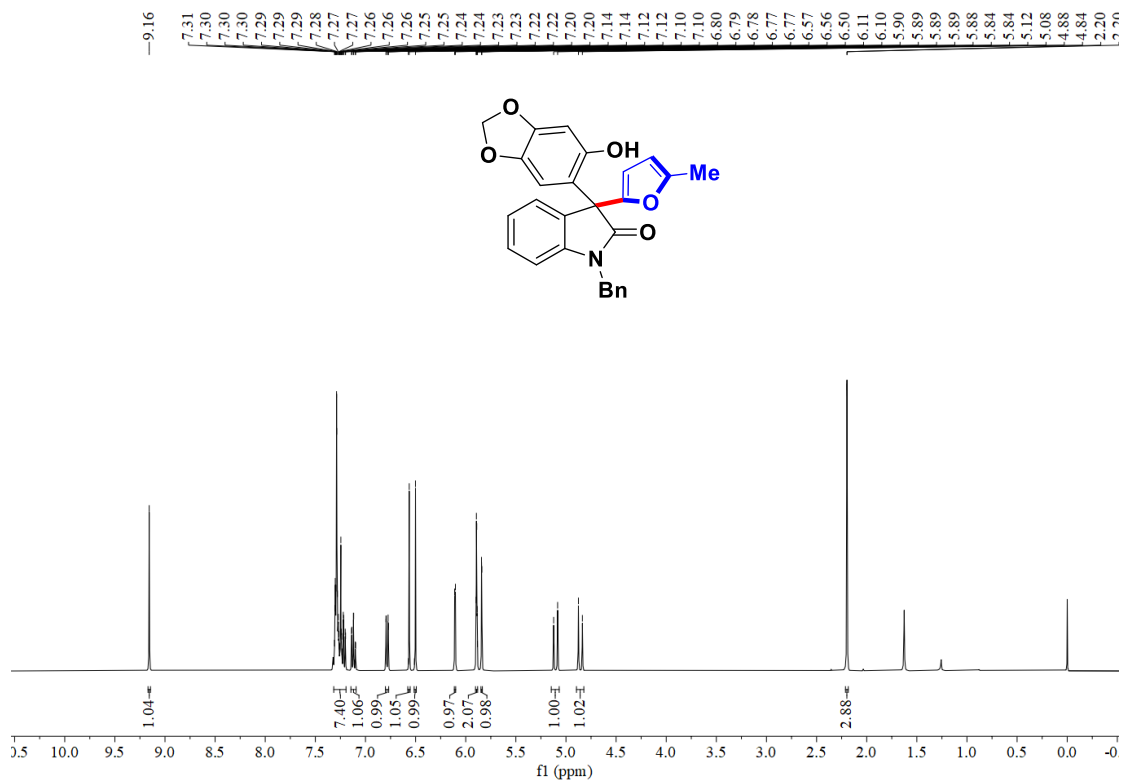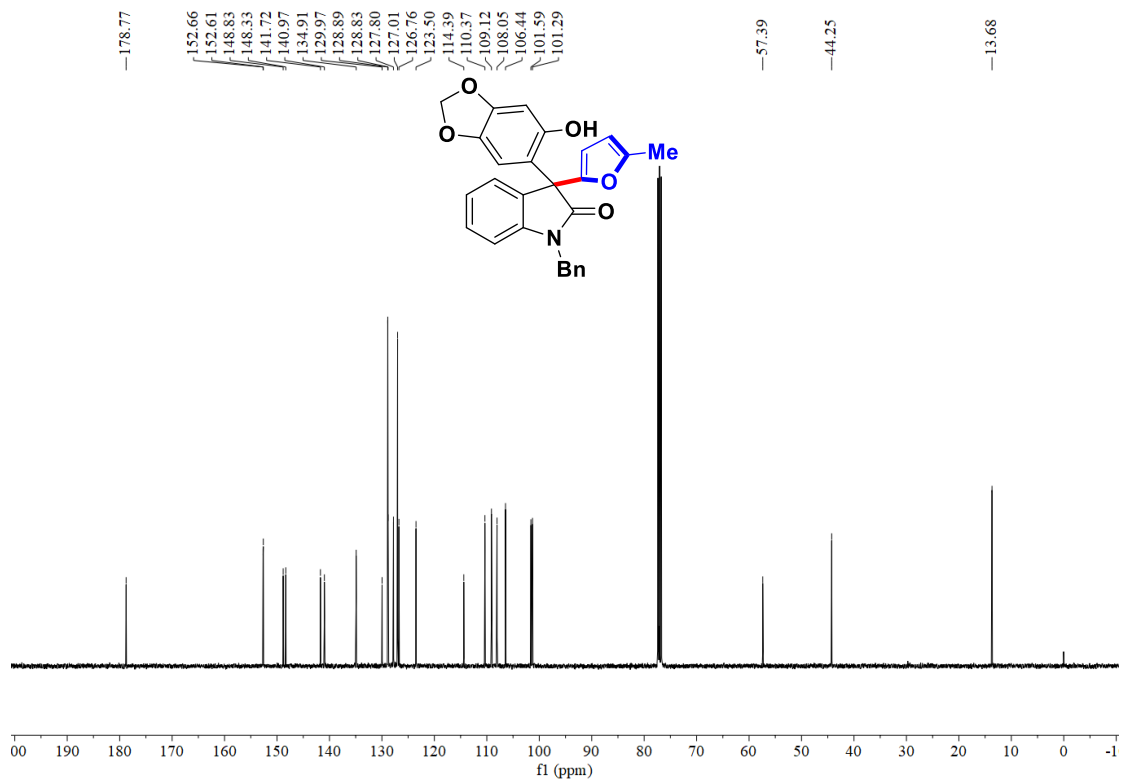

**1-benzyl-3-(6-hydroxybenzo[*d*][1,3]dioxol-5-yl)-3-(pyrrolidin-1-yl)indolin-2-one  
(4a)**

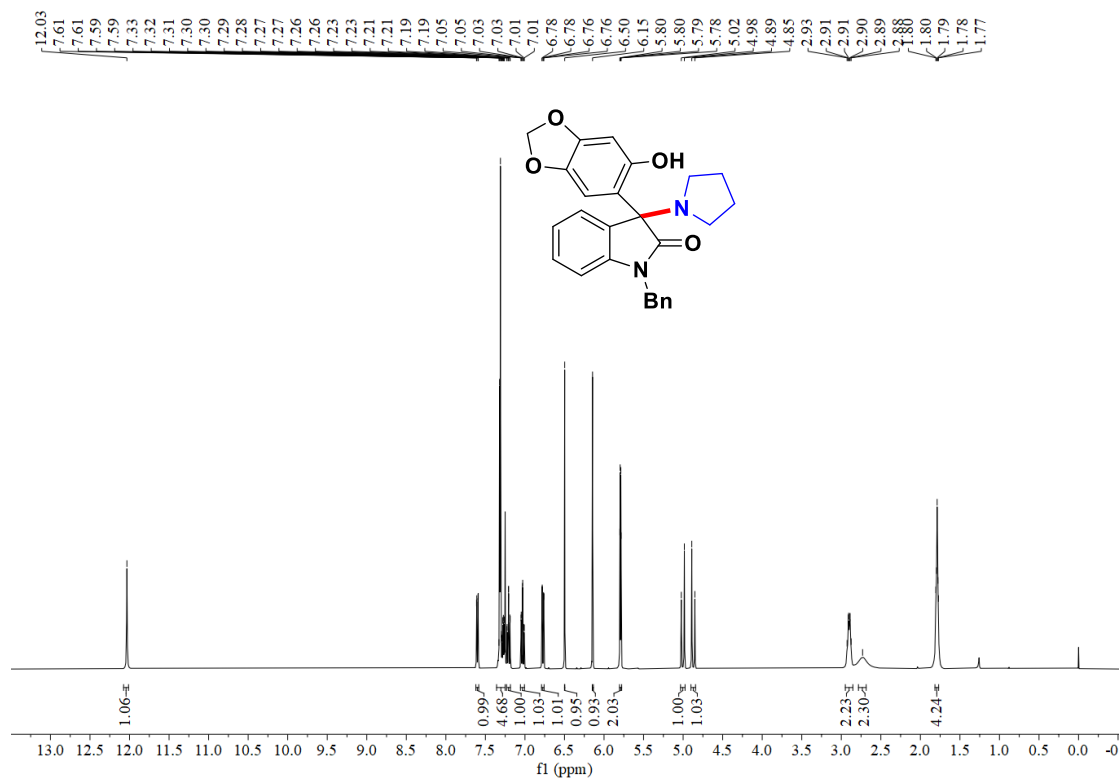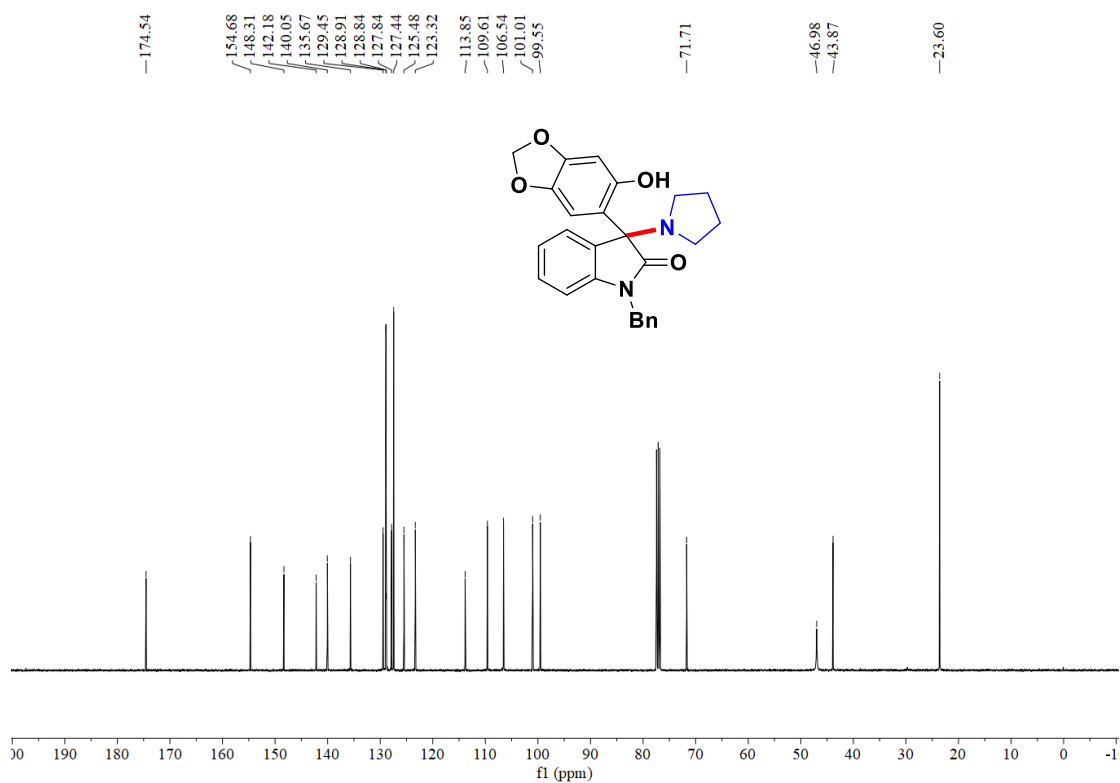

**1-benzyl-3-(6-hydroxybenzo[d][1,3]dioxol-5-yl)-3-(piperidin-1-yl)indolin-2-one  
(4b)**

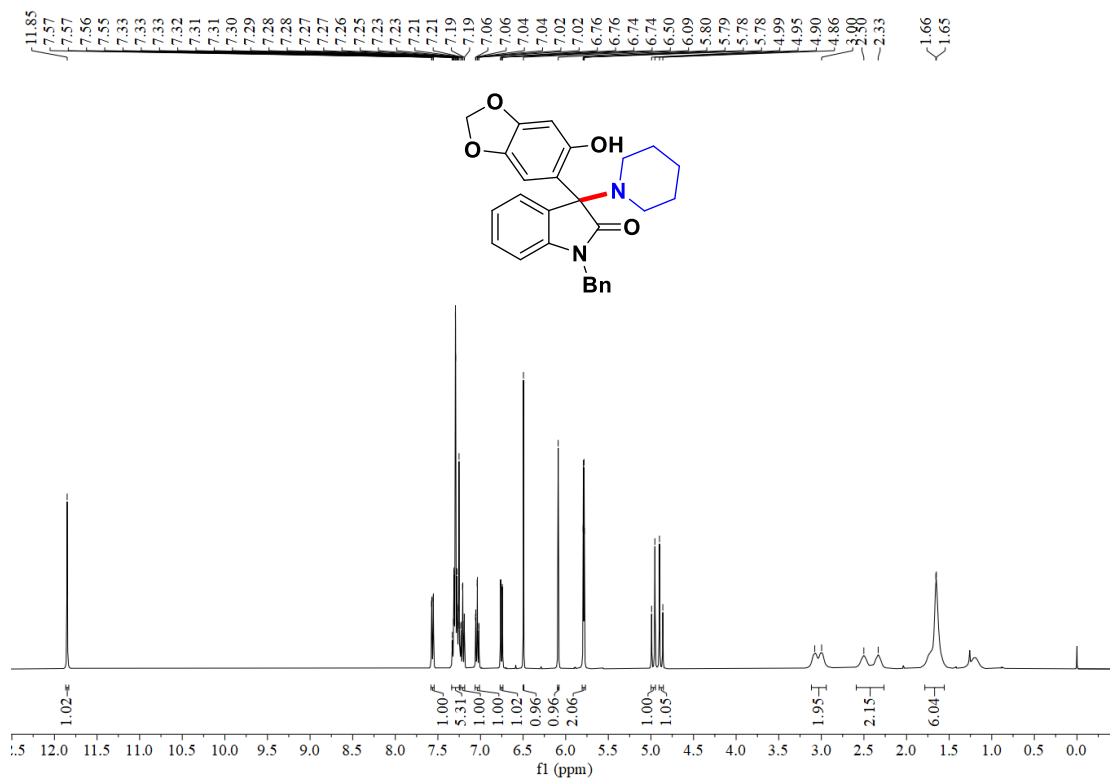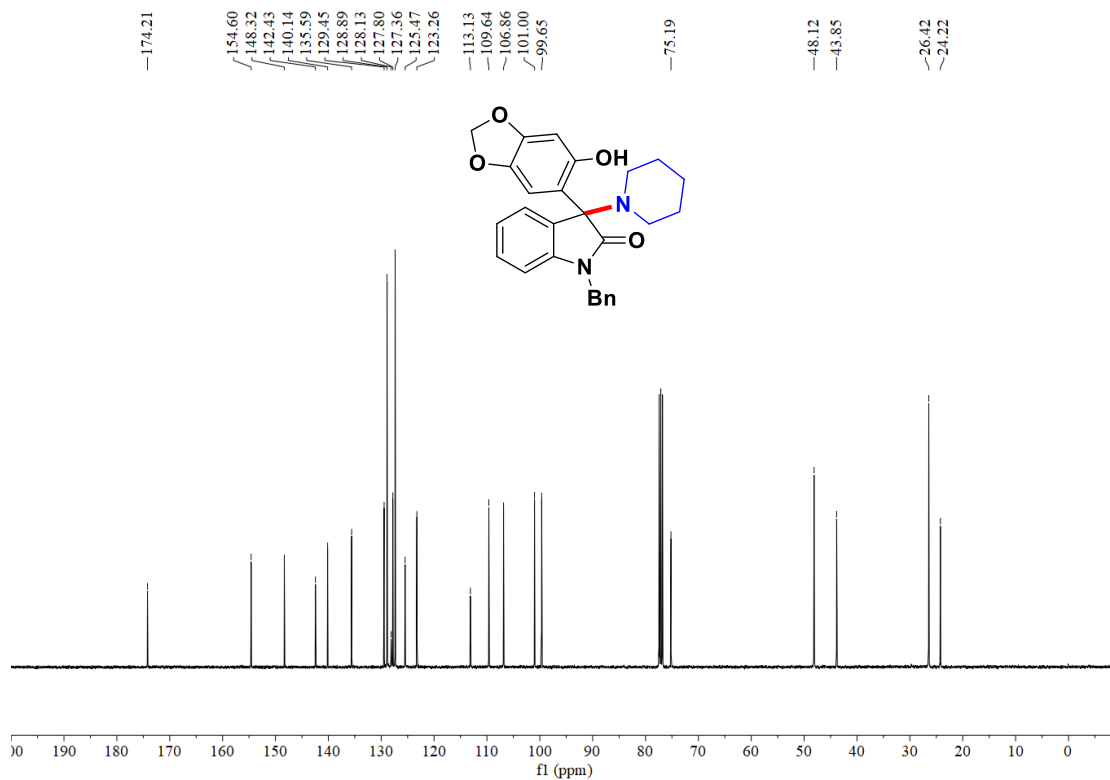



# 1-benzyl-3-(6-hydroxybenzo[d][1,3]dioxol-5-yl)-3-morpholinoindolin-2-one (4c)

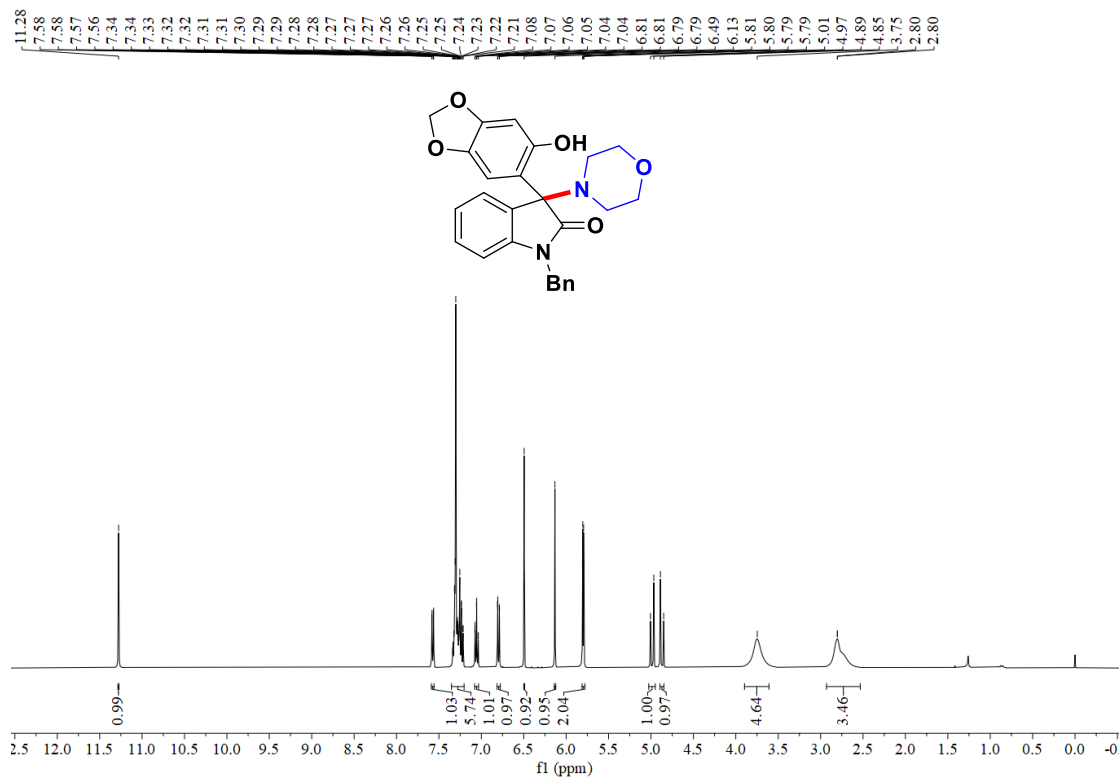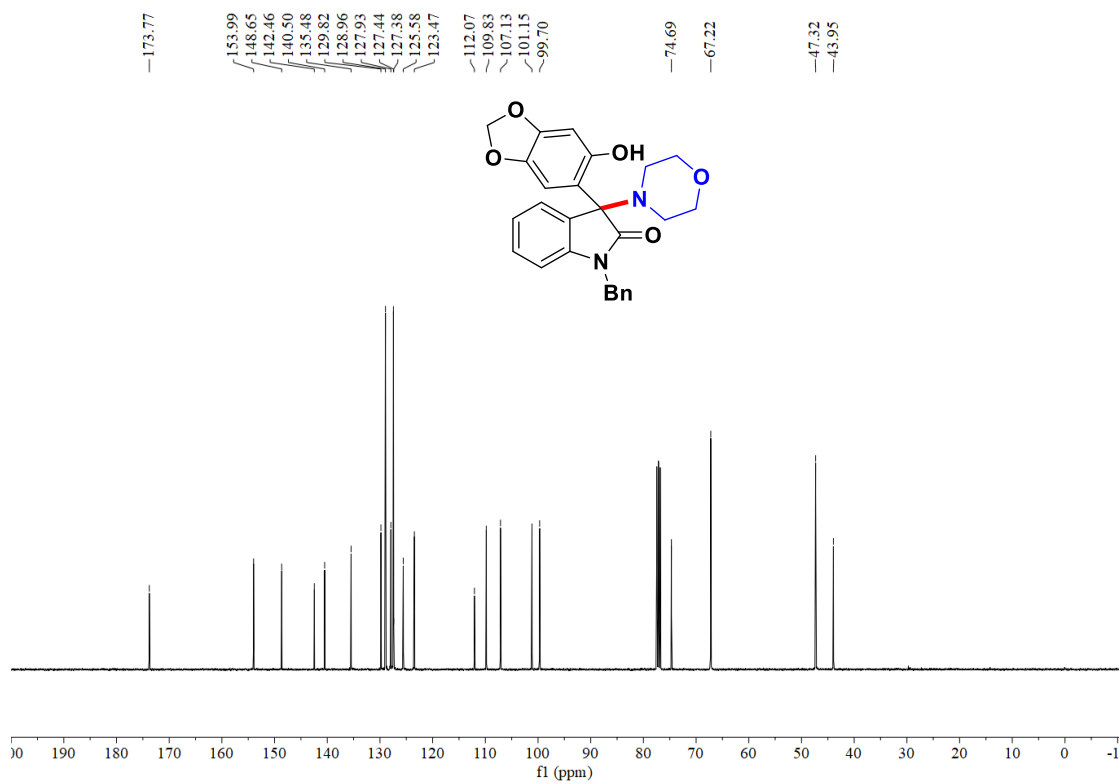

**1-benzyl-3-(6-hydroxybenzo[d][1,3]dioxol-5-yl)-3-thiomorpholinoindolin-2-one  
(4d)**

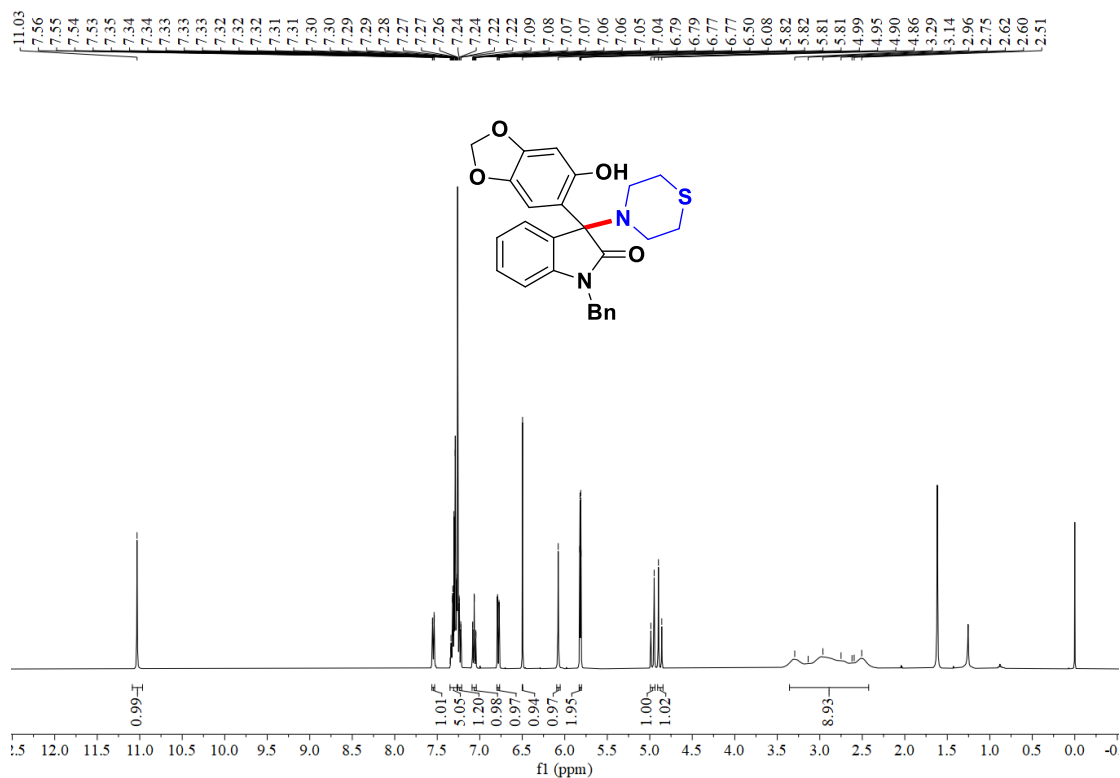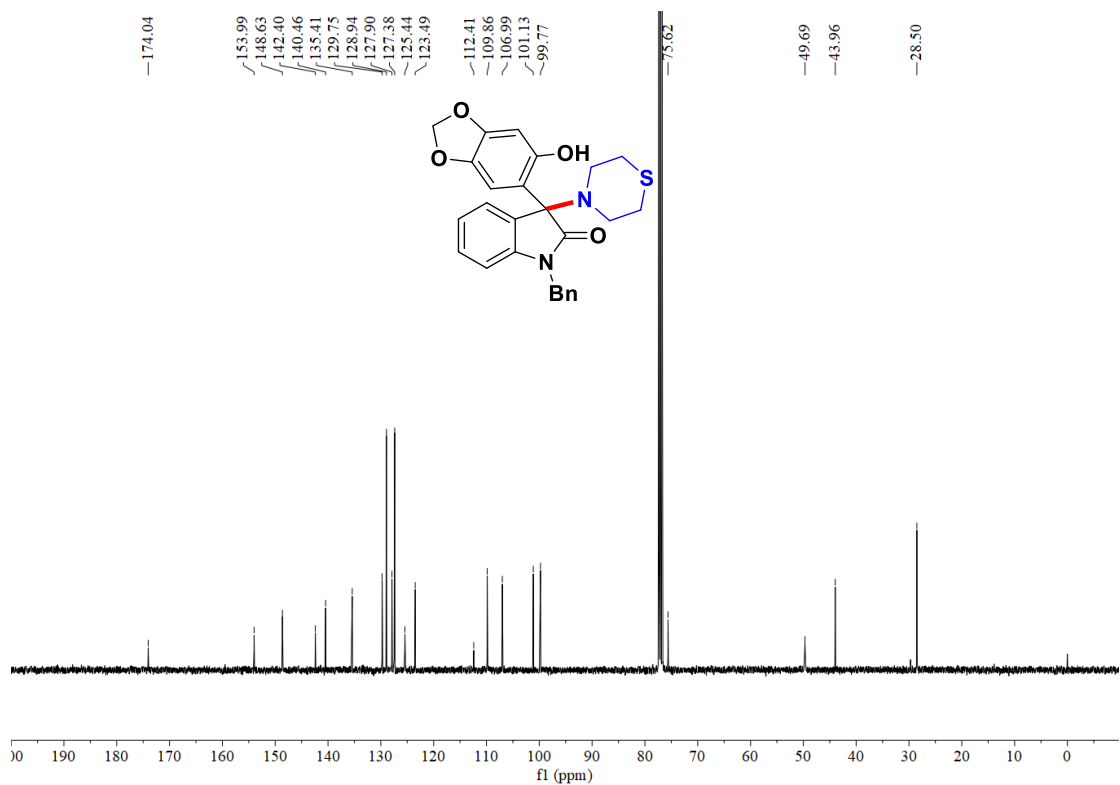

**3-(azepan-1-yl)-1-benzyl-3-(6-hydroxybenzo[d][1,3]dioxol-5-yl)indolin-2-one (4e)**

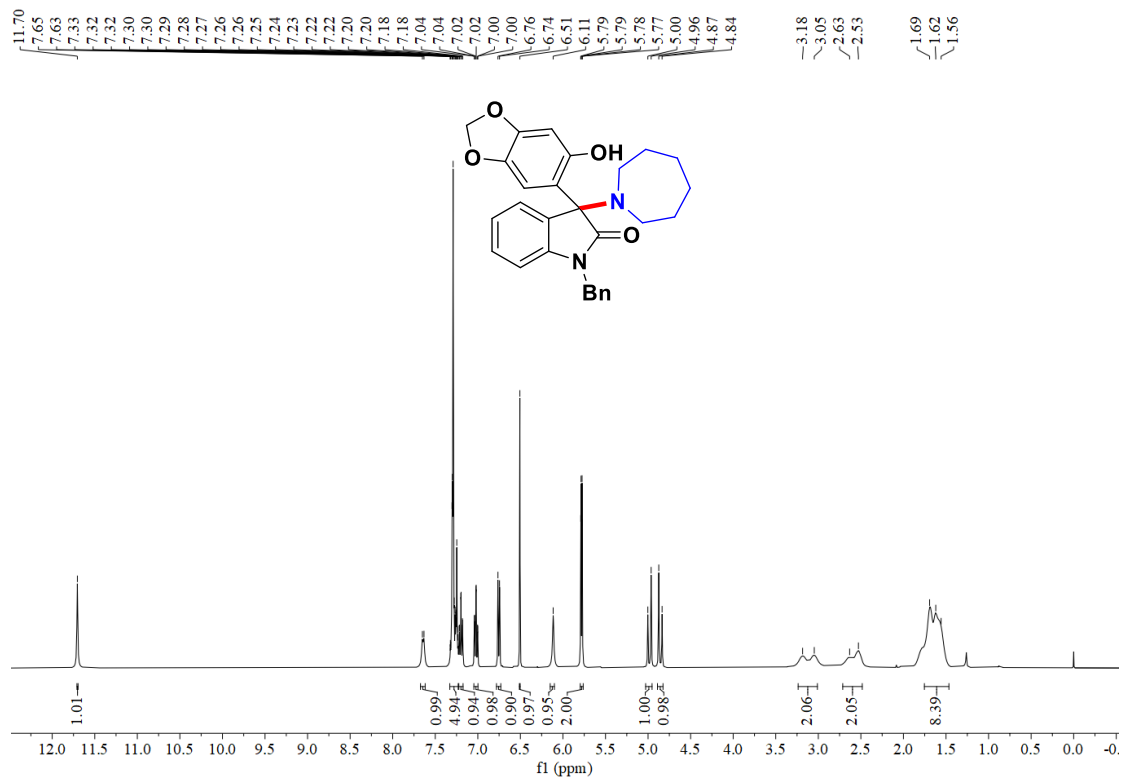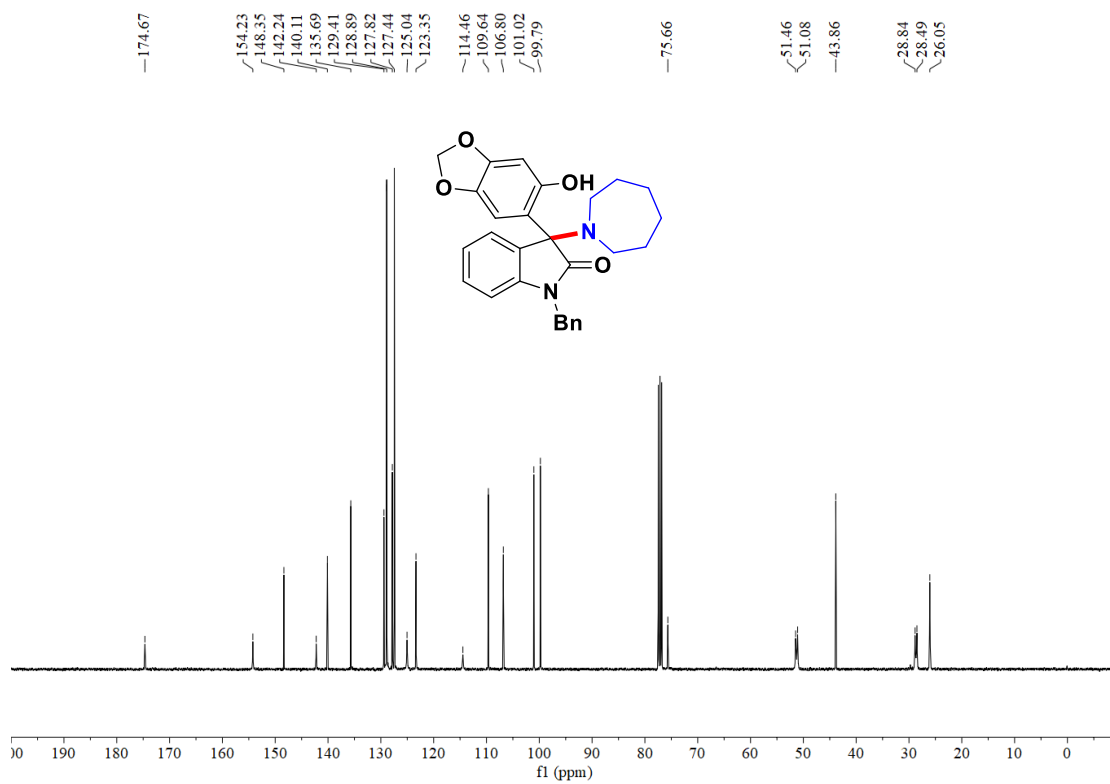

**1-benzyl-3-(6-hydroxybenzo[d][1,3]dioxol-5-yl)-3-(4-phenylpiperazin-1-yl)indolin-2-one (4f)**

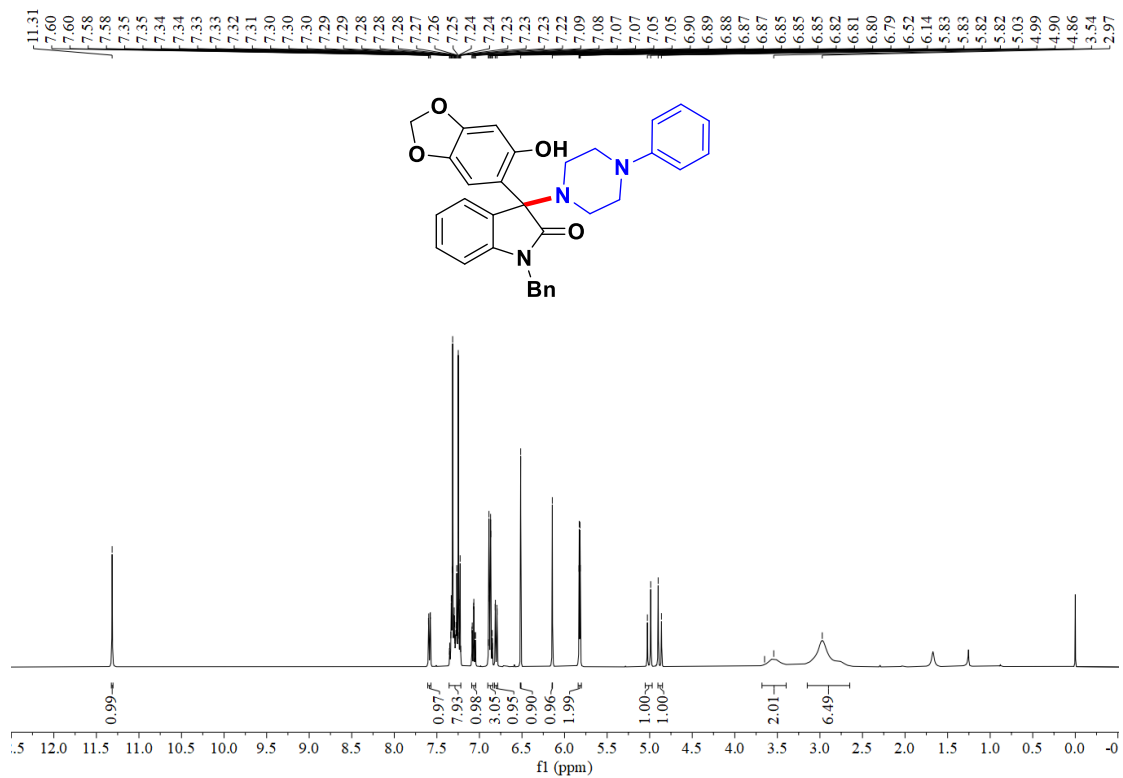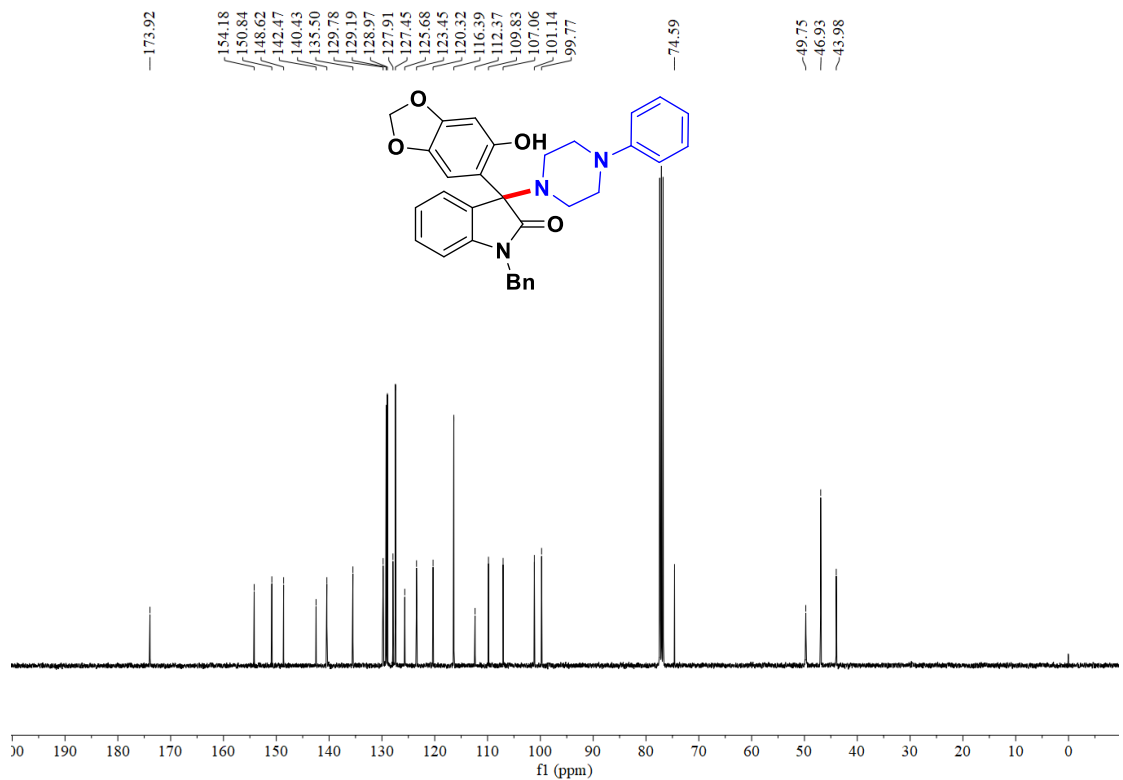

**1-benzyl-3-(6-hydroxybenzo[d][1,3]dioxol-5-yl)-3-(octahydro-2H-isoindol-2-yl)indolin-2-one (4g)**

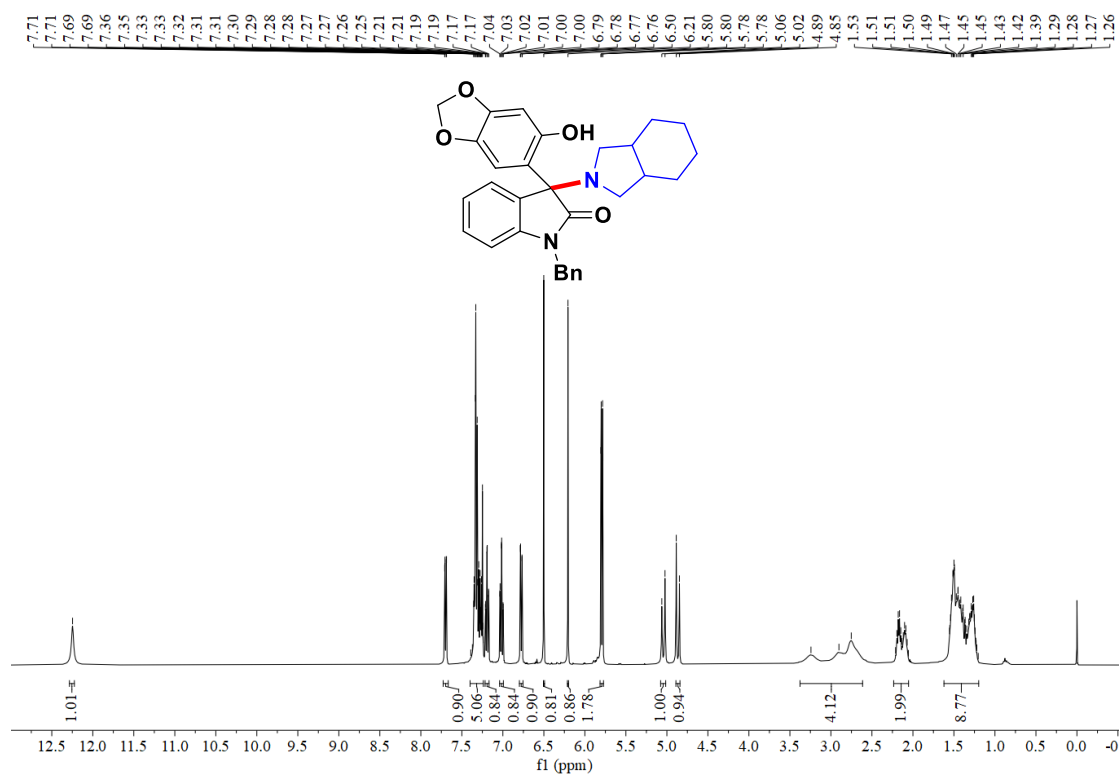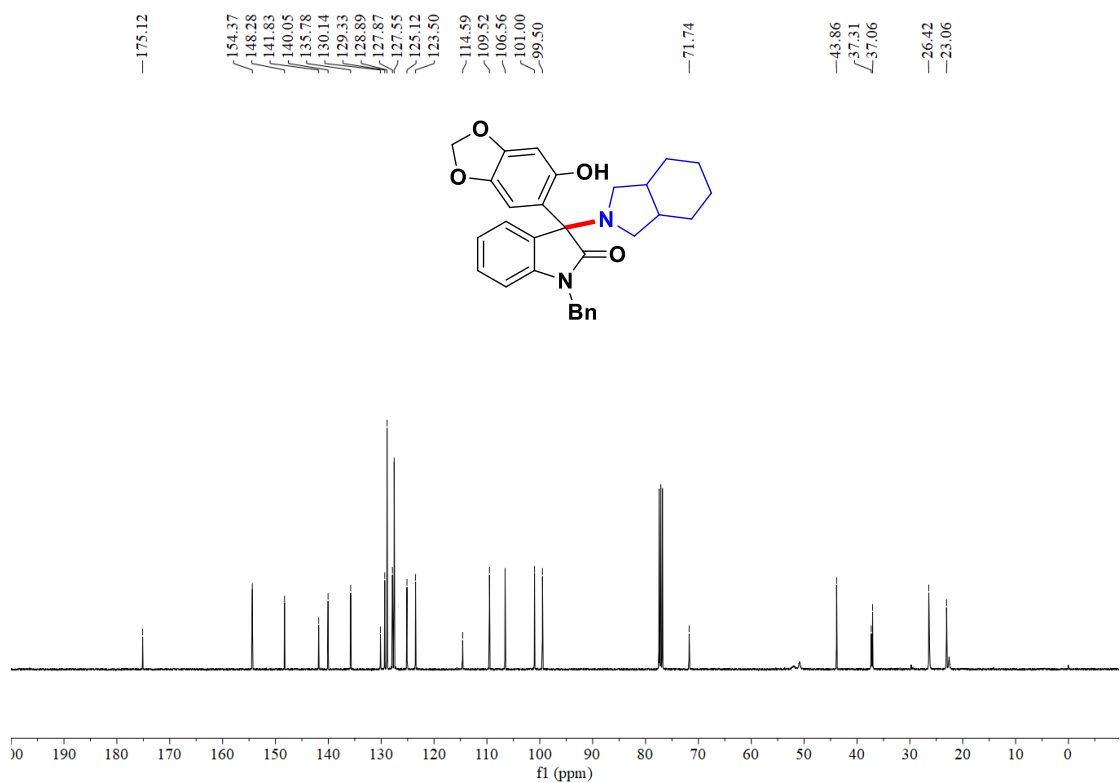

**1-benzyl-3-(3,4-dihydroisoquinolin-2(1*H*)-yl)-3-(6-hydroxybenzo[*d*][1,3]dioxol-5-yl)indolin-2-one (4h)**

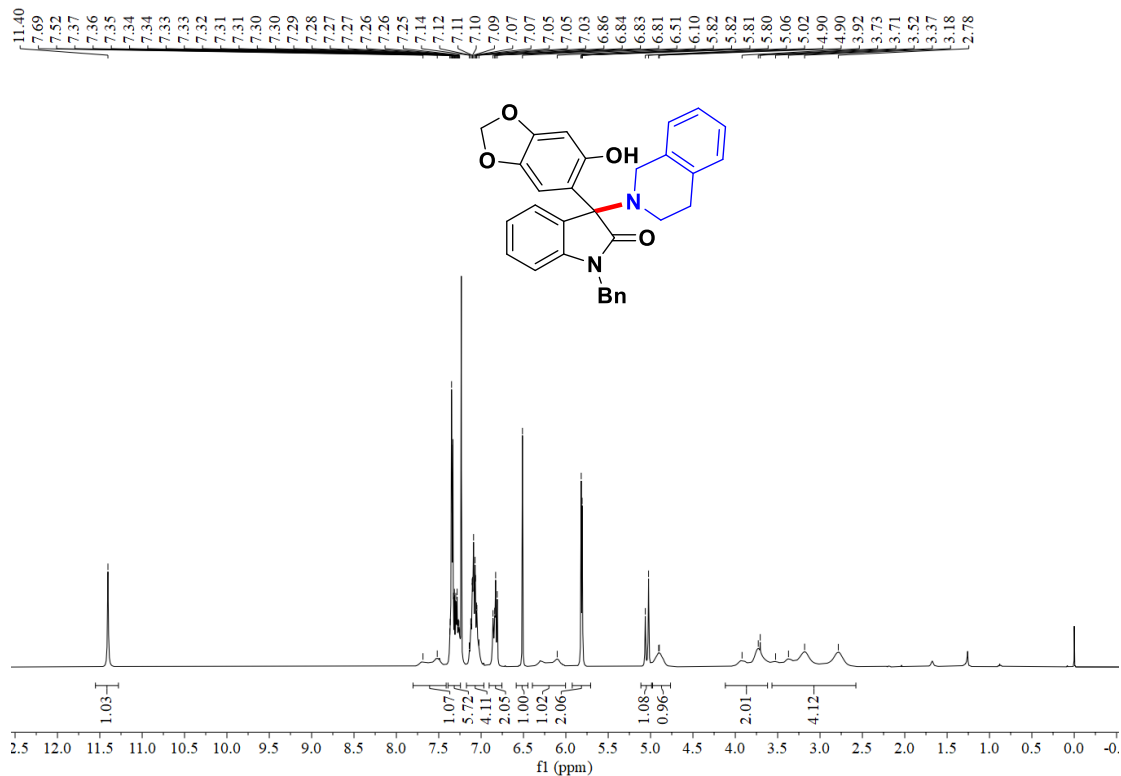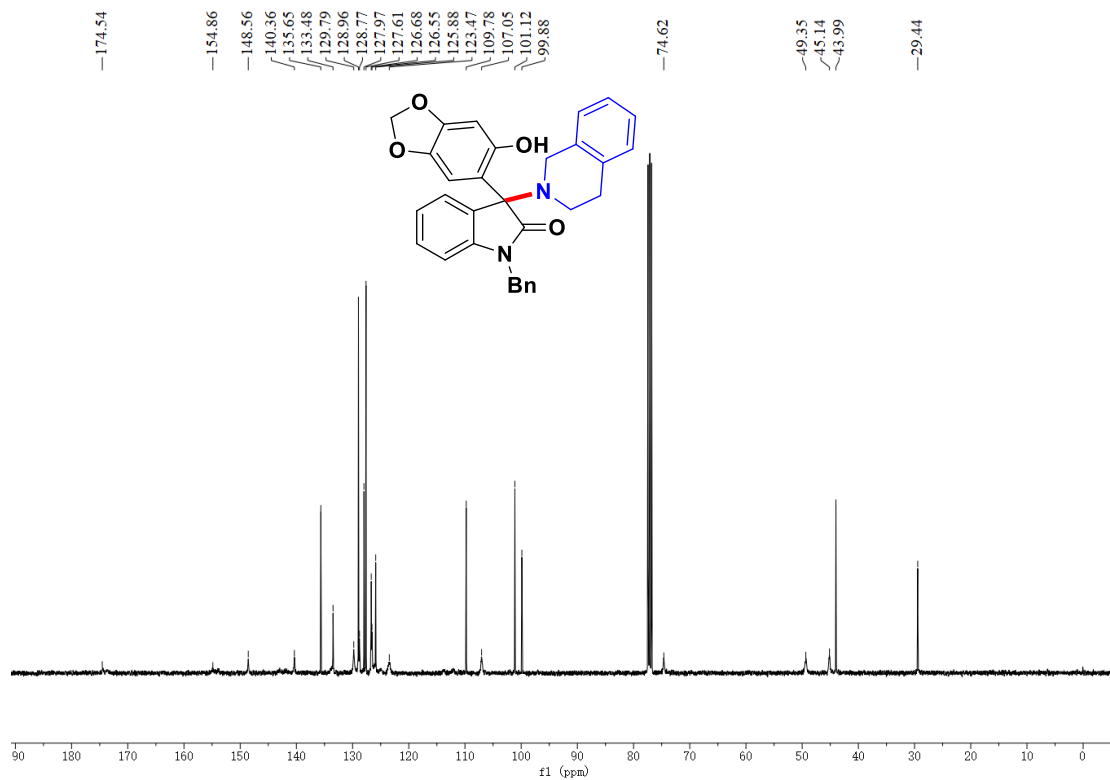

**1-benzyl-3-(dimethylamino)-3-(6-hydroxybenzo[d][1,3]dioxol-5-yl)indolin-2-one**  
**(4i)**

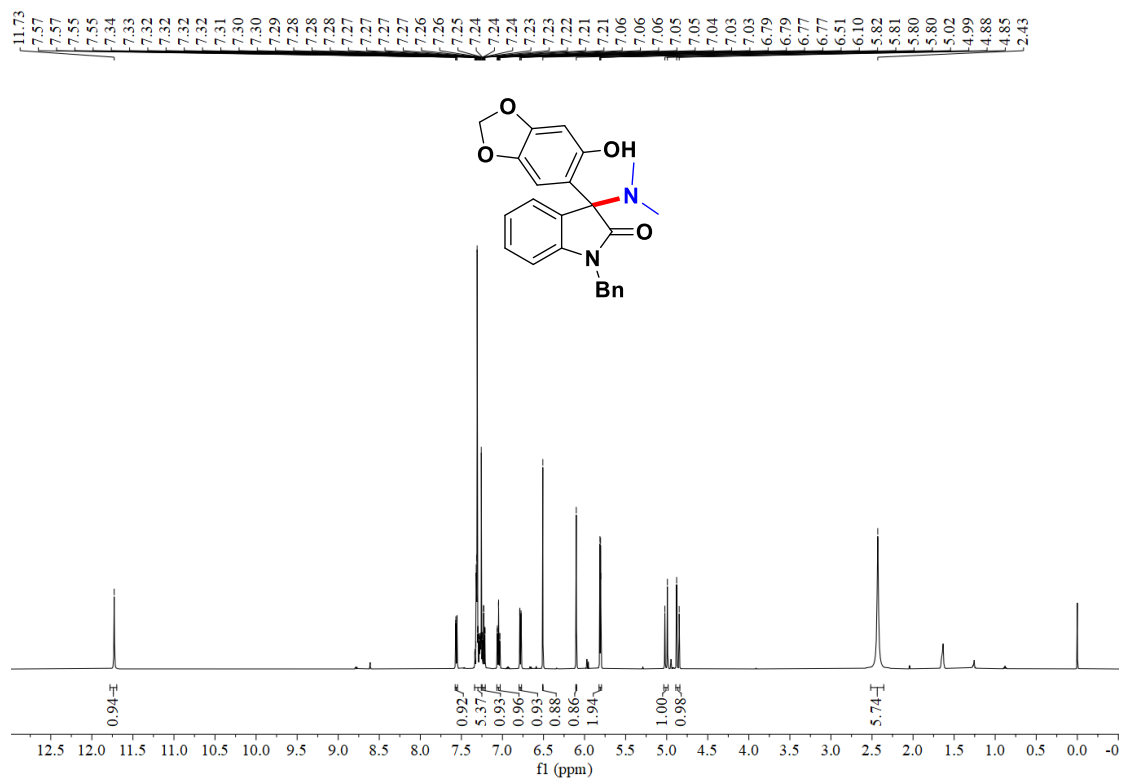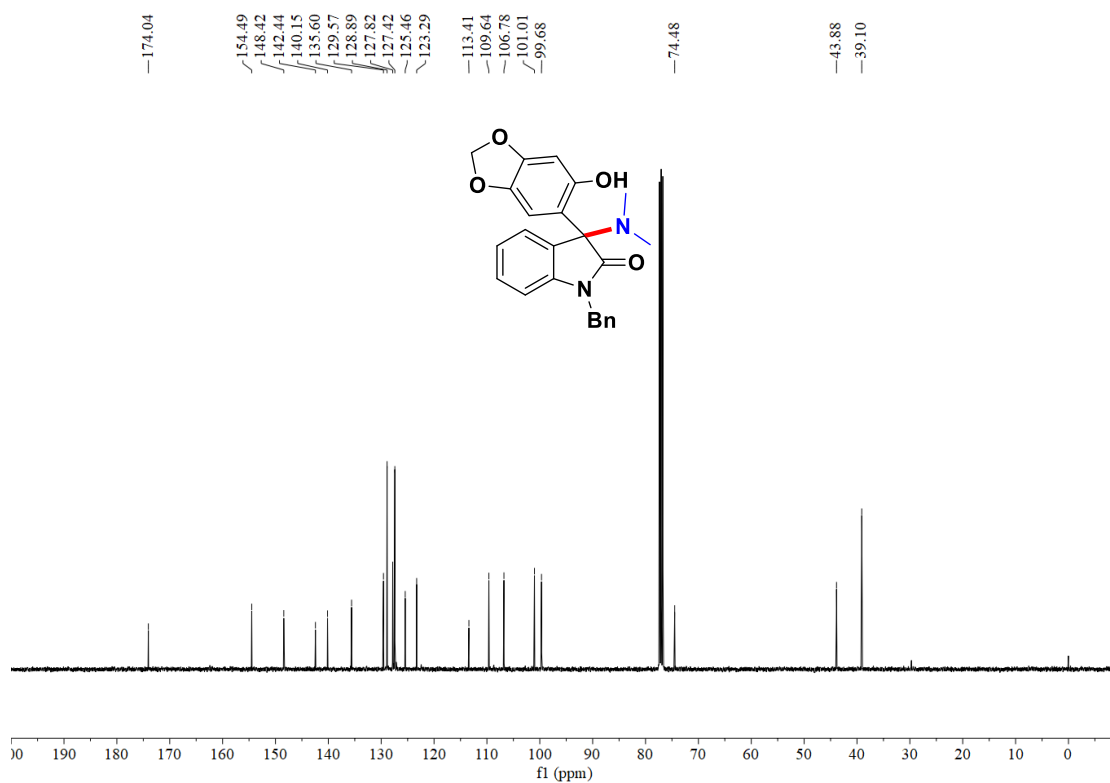

**1-benzyl-3-(benzyl(methyl)amino)-3-(6-hydroxybenzo[*d*][1,3]dioxol-5-yl)indolin-2-one (4j)**

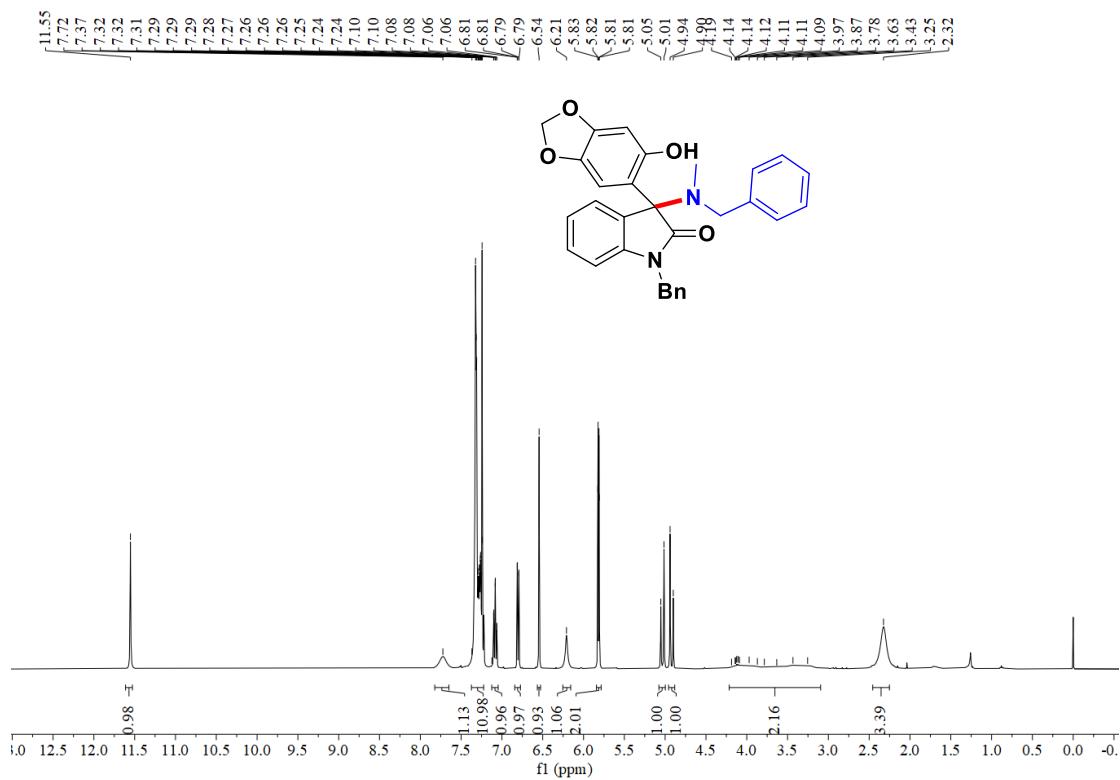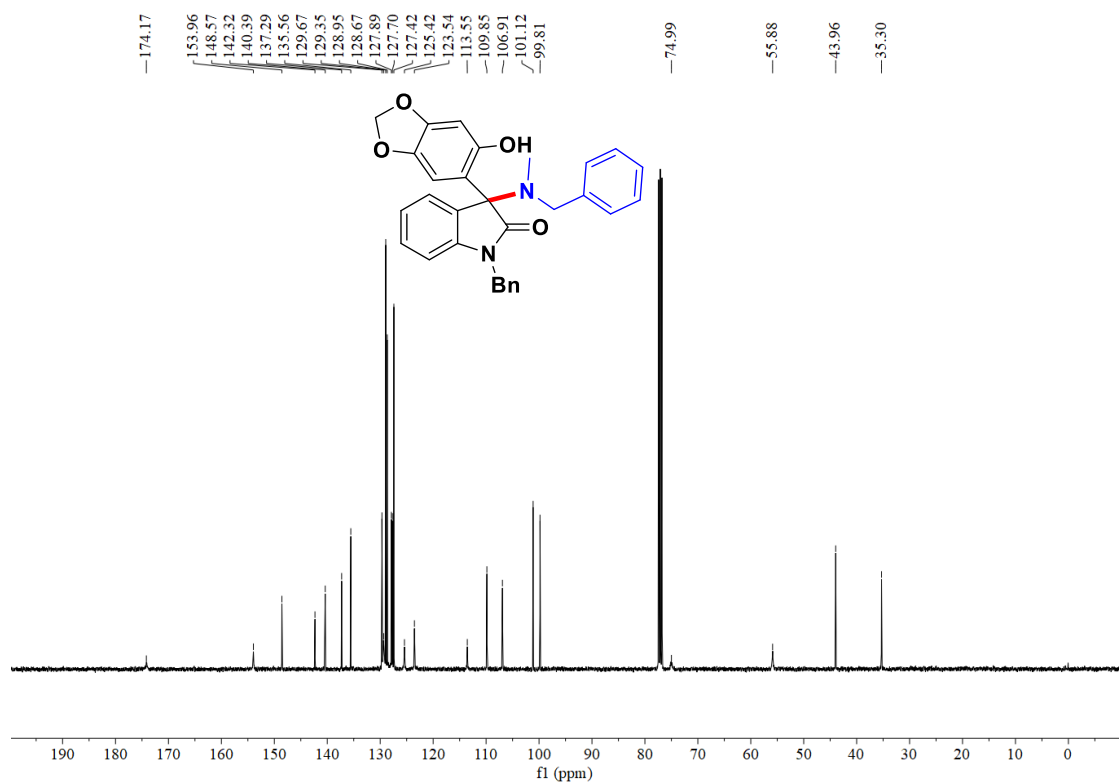



**3-(6-hydroxybenzo[*d*][1,3]dioxol-5-yl)-3-(pyrrolidin-1-yl)indolin-2-one (4k)**

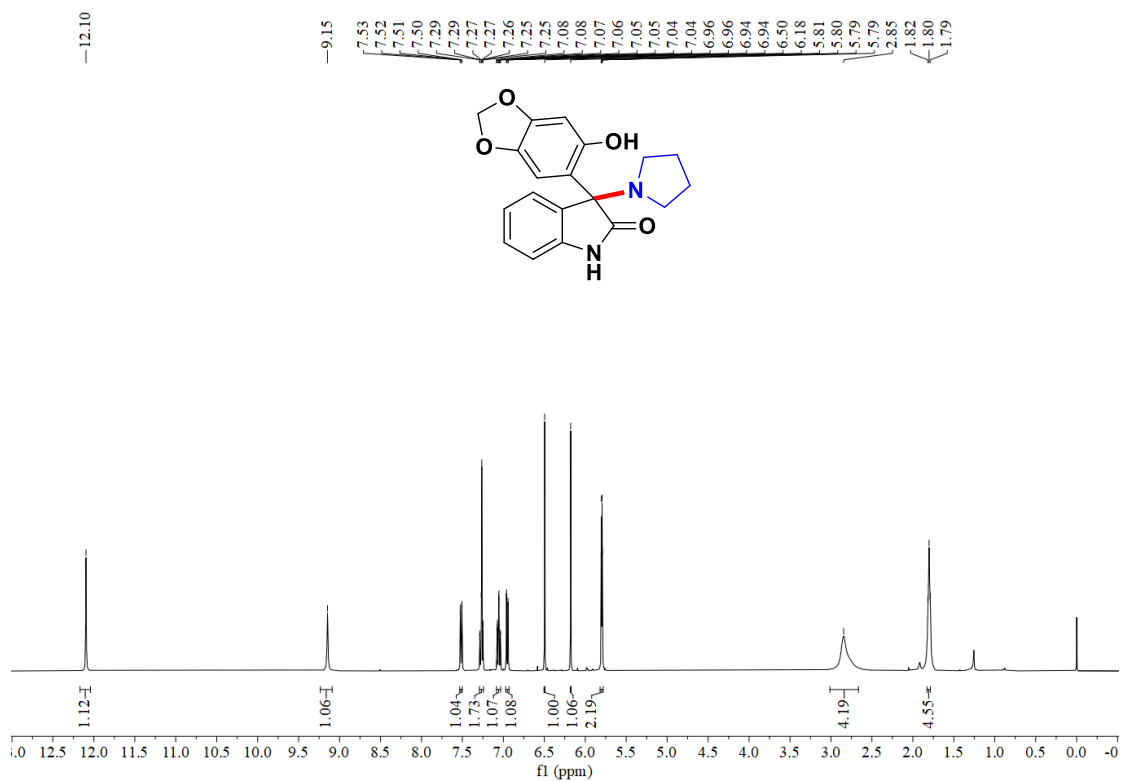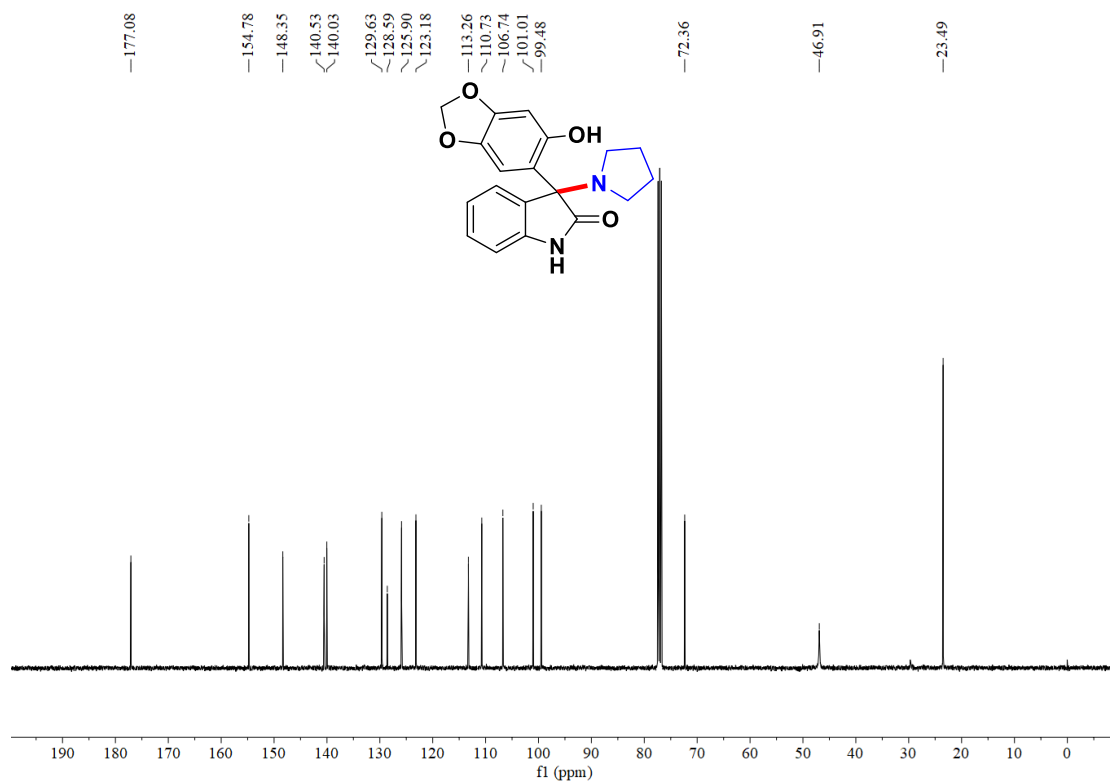

# 1-benzyl-3-(1-hydroxynaphthalen-2-yl)-3-(pyrrolidin-1-yl)indolin-2-one (4l)

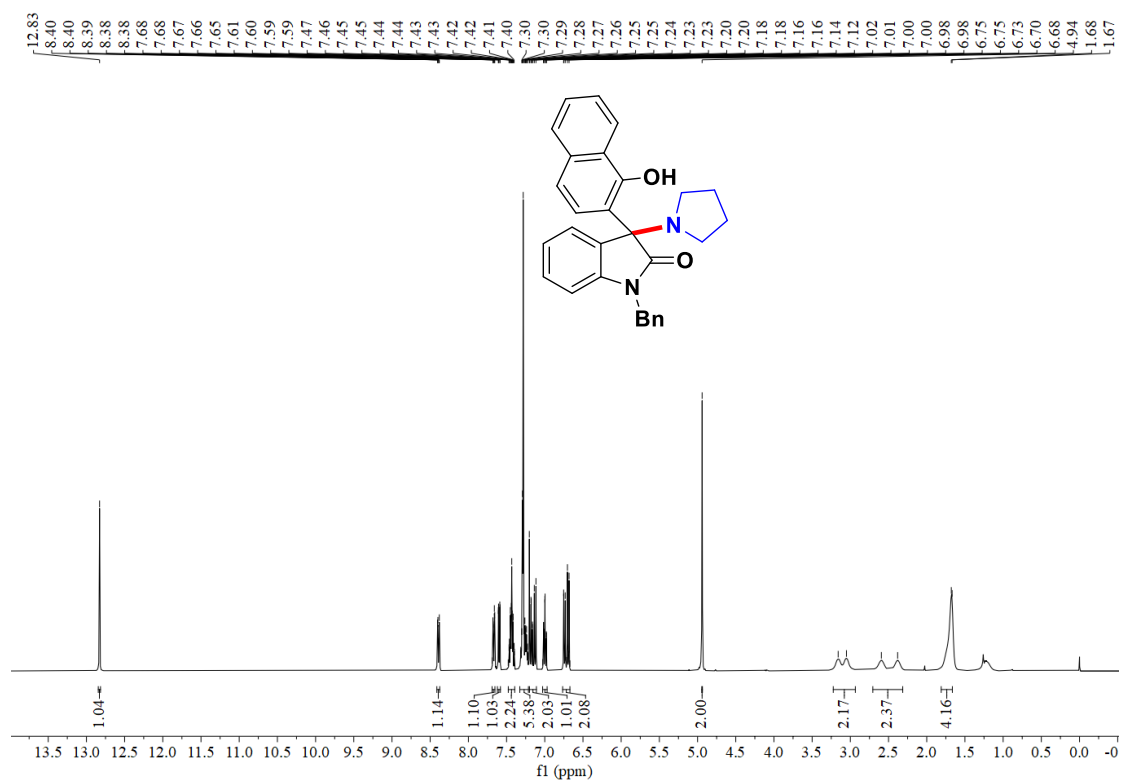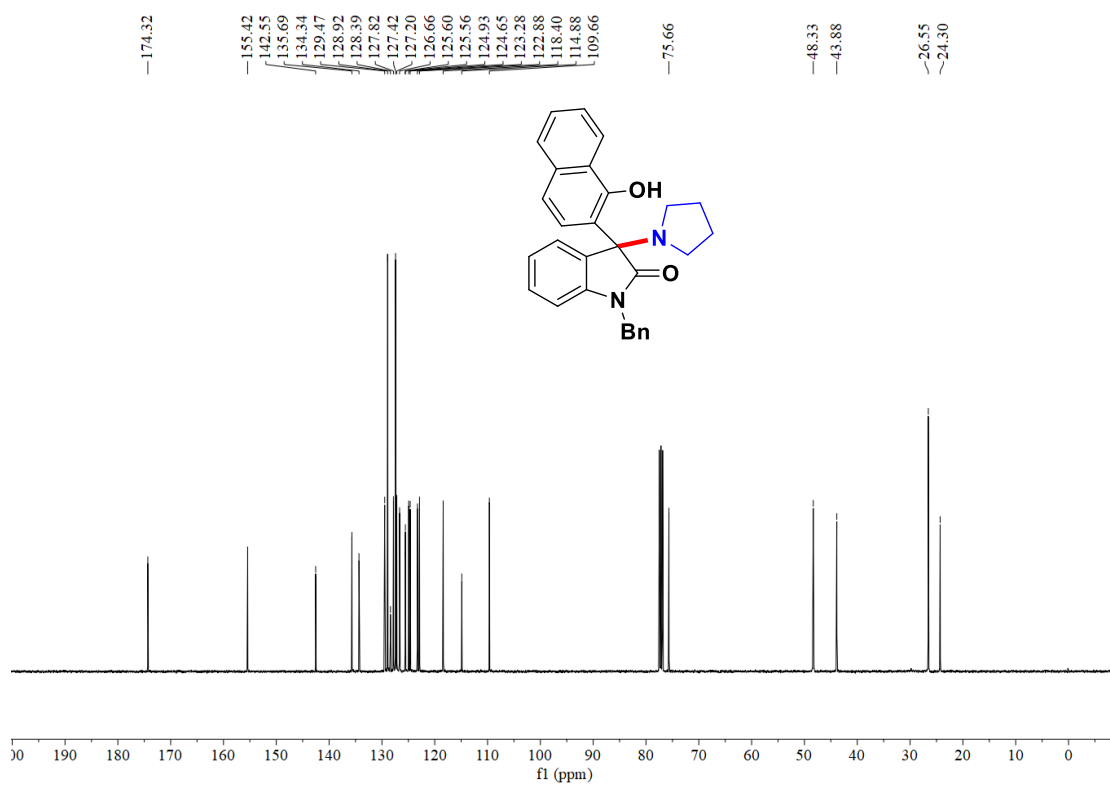

# 1-benzyl-3-(6-hydroxybenzo[d][1,3]dioxol-5-yl)-3-methoxyindolin-2-one (5a)

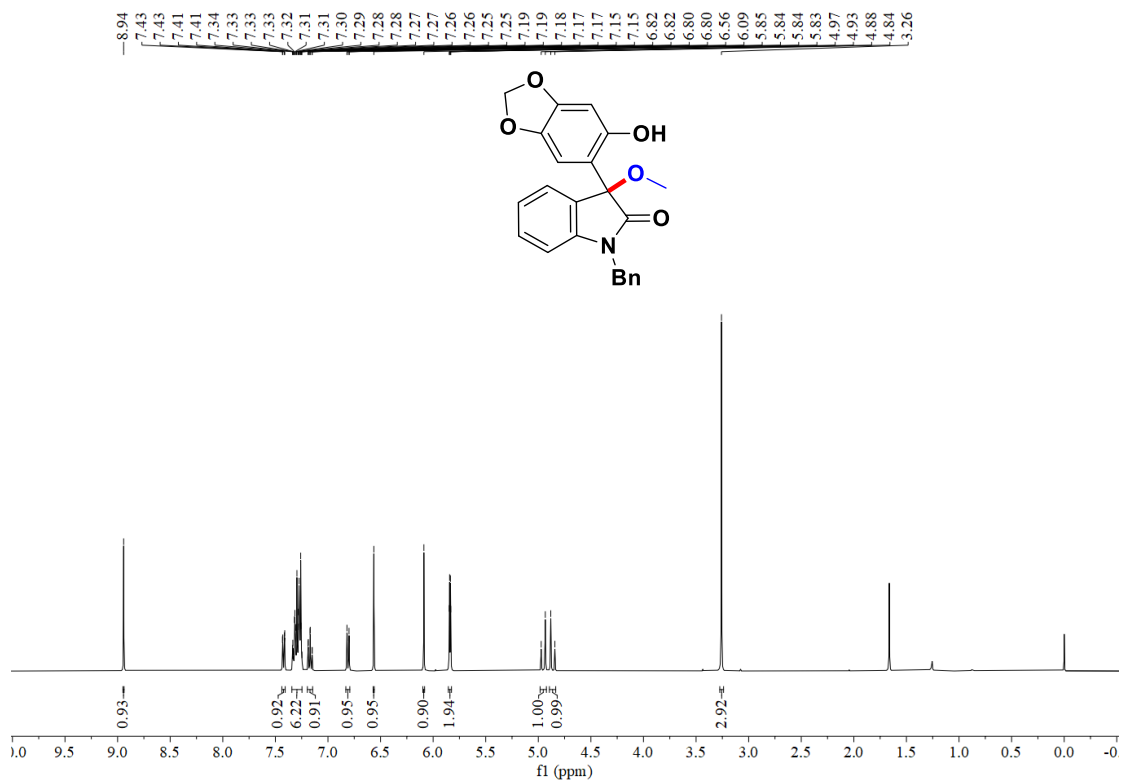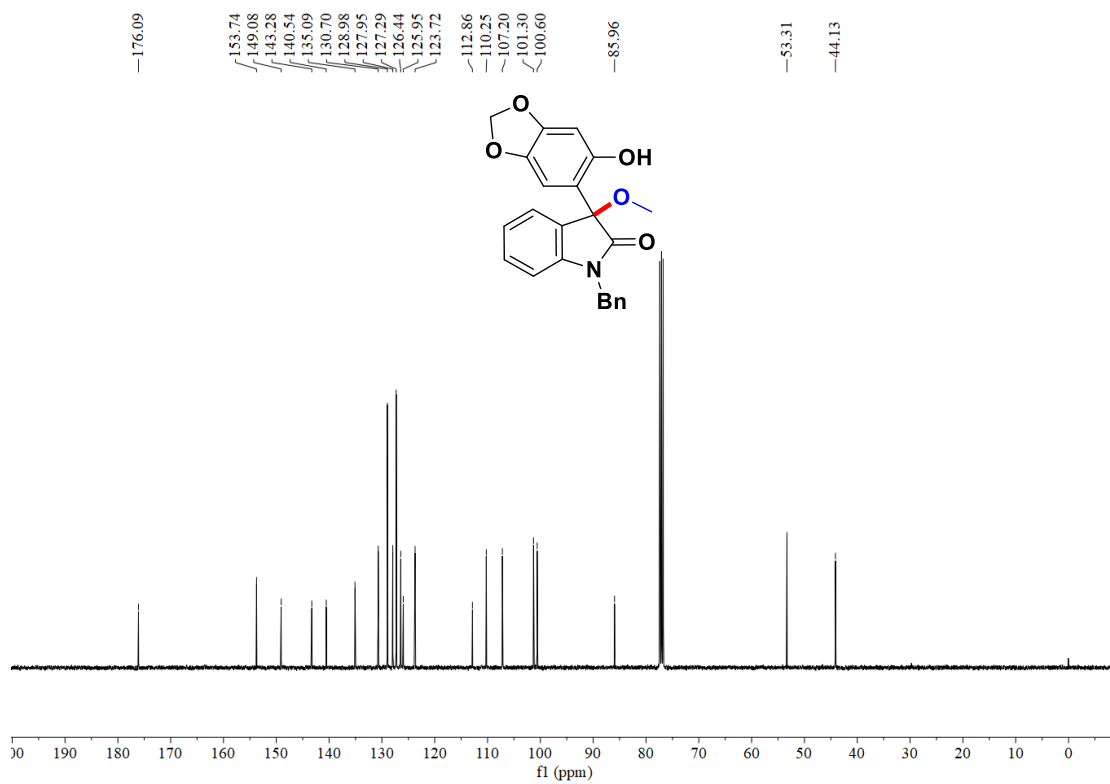

**1-benzyl-3-ethoxy-3-(6-hydroxybenzo[d][1,3]dioxol-5-yl)indolin-2-one (5b)**

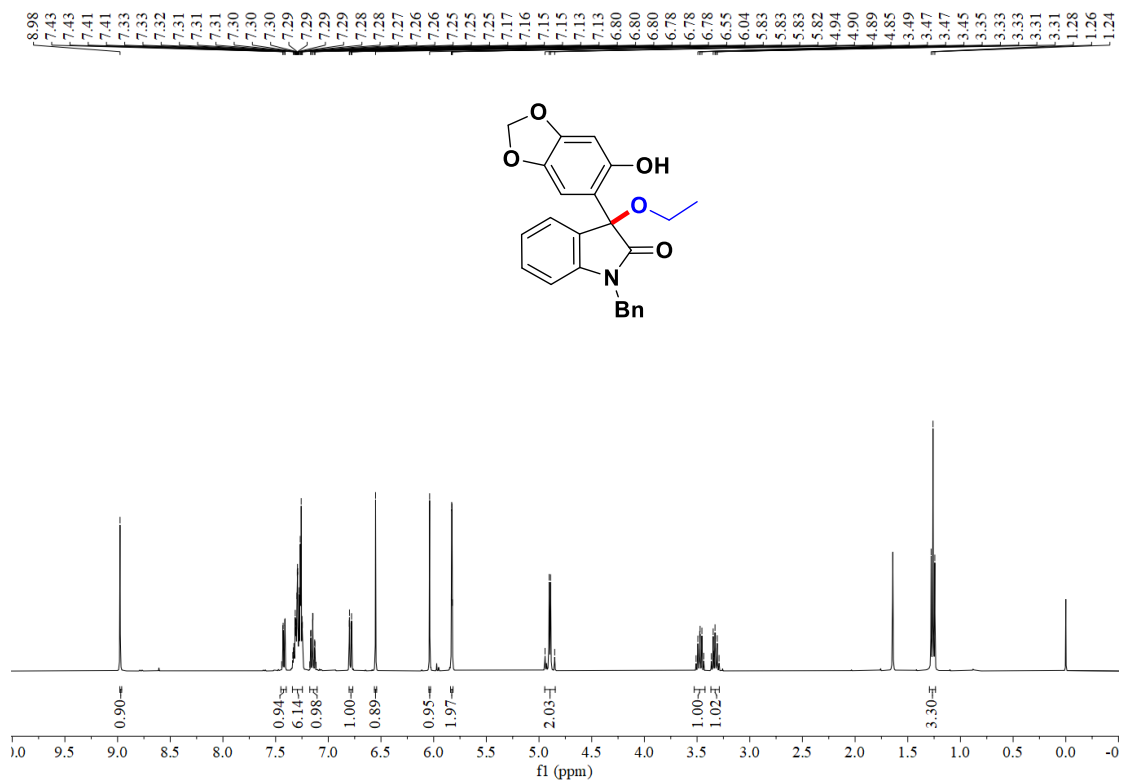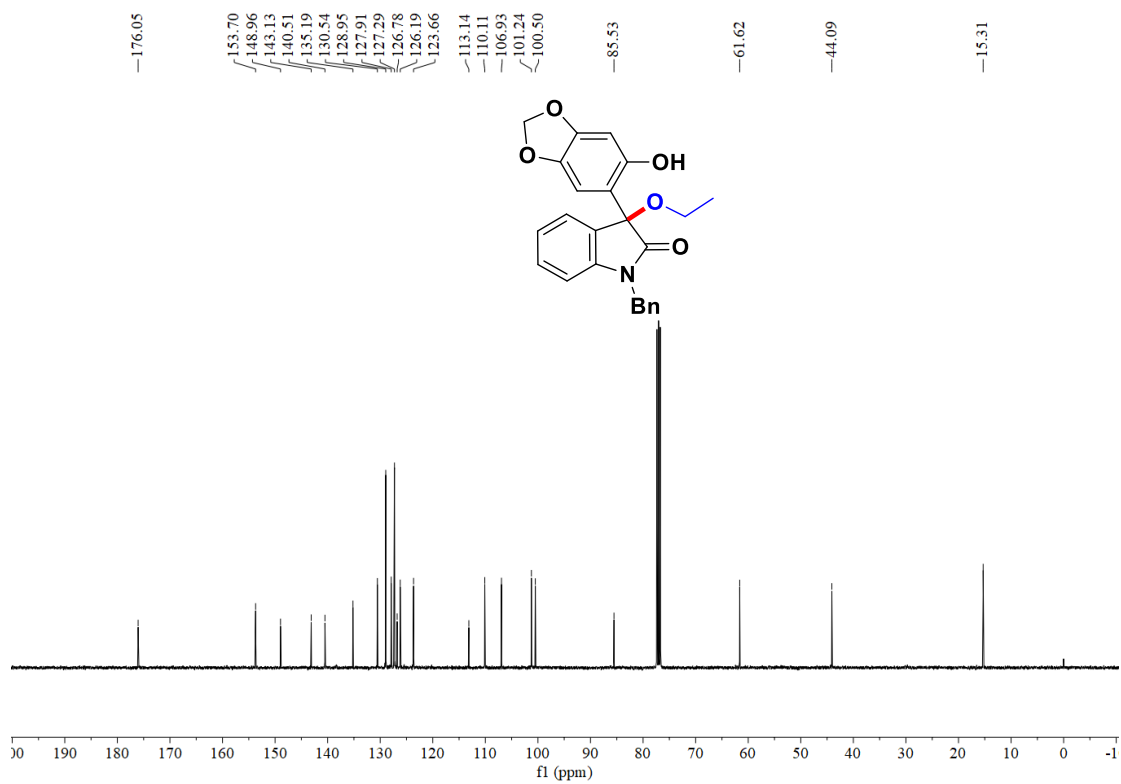

**1-benzyl-3-(2-bromoethoxy)-3-(6-hydroxybenzo[d][1,3]dioxol-5-yl)indolin-2-one  
(5c)**

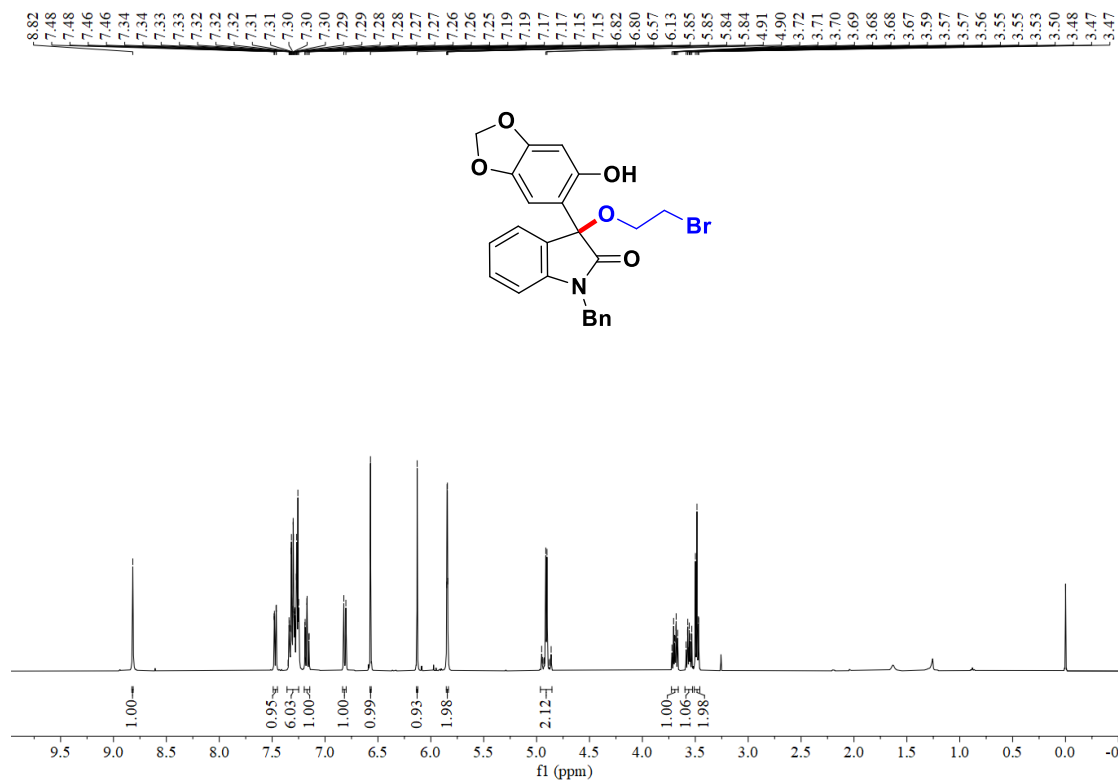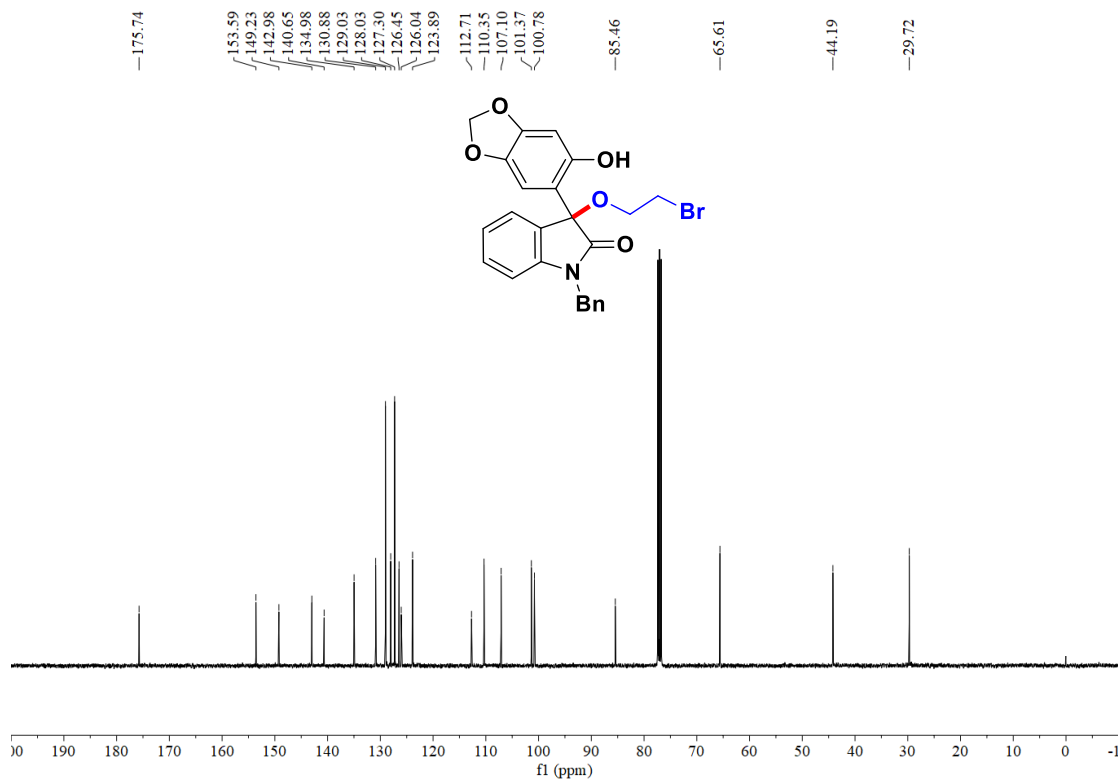

**1-benzyl-3-(6-hydroxybenzo[d][1,3]dioxol-5-yl)-3-(prop-2-yn-1-yloxy)indolin-2-one (5d)**

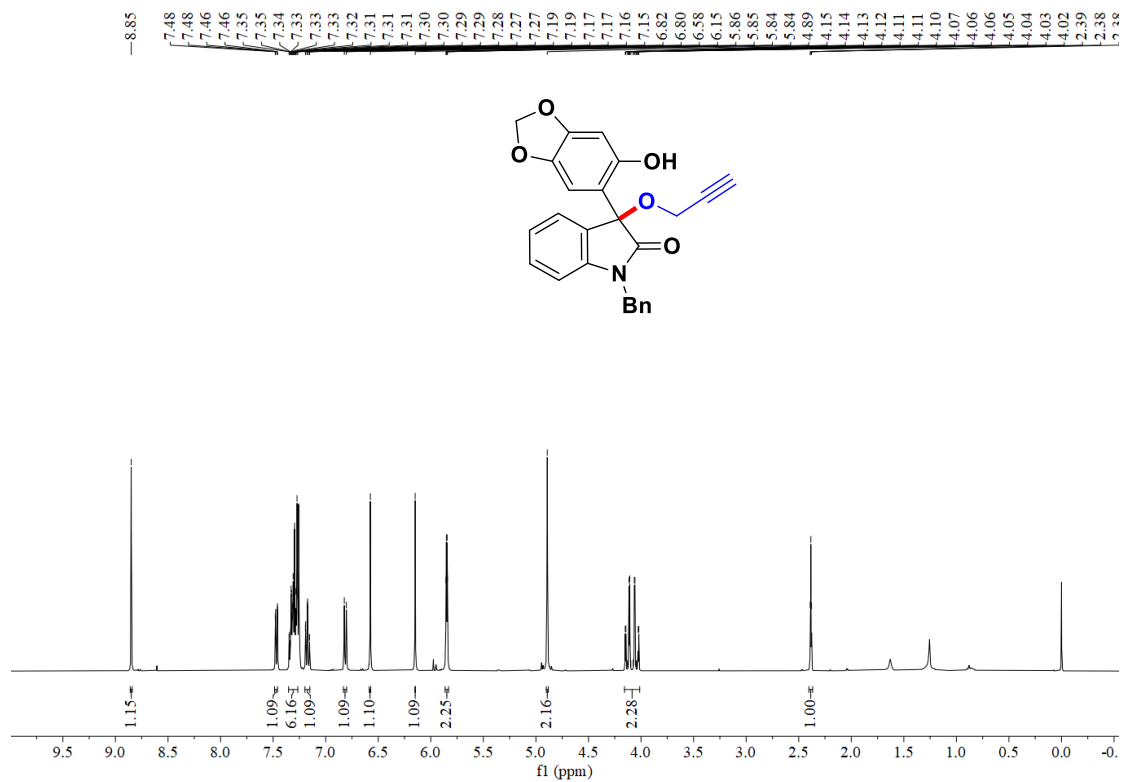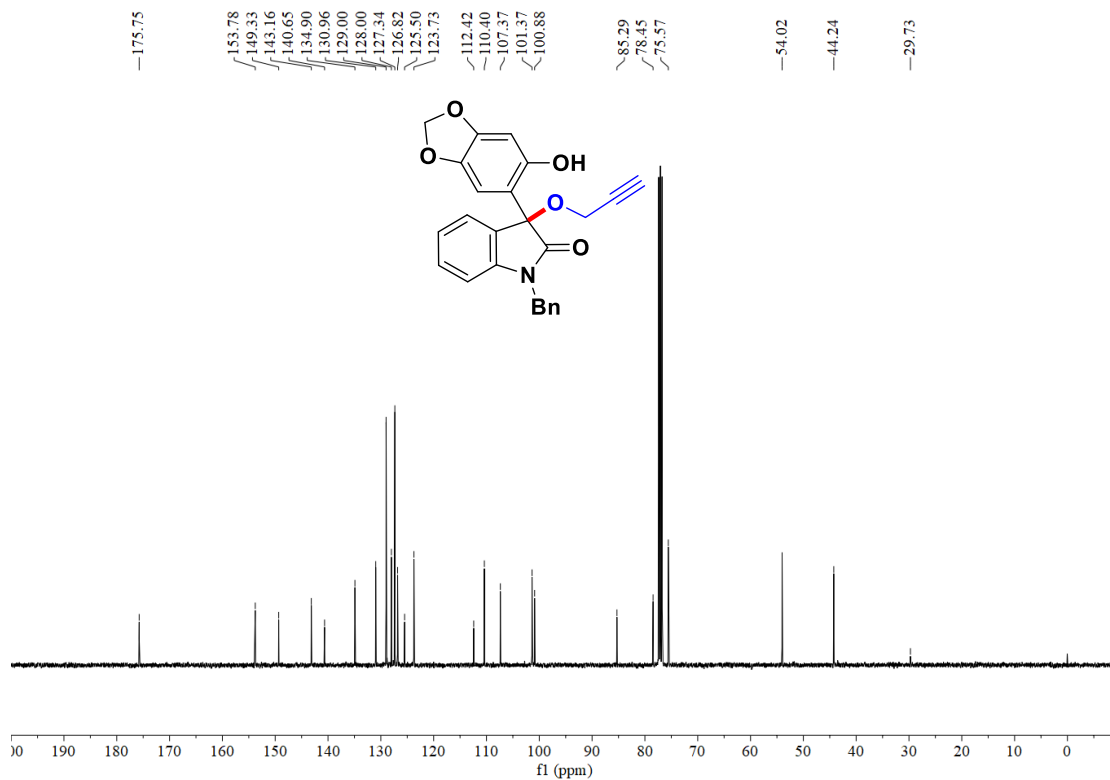

**1-benzyl-3-(but-3-yn-1-yloxy)-3-(6-hydroxybenzo[d][1,3]dioxol-5-yl)indolin-2-one  
(5e)**

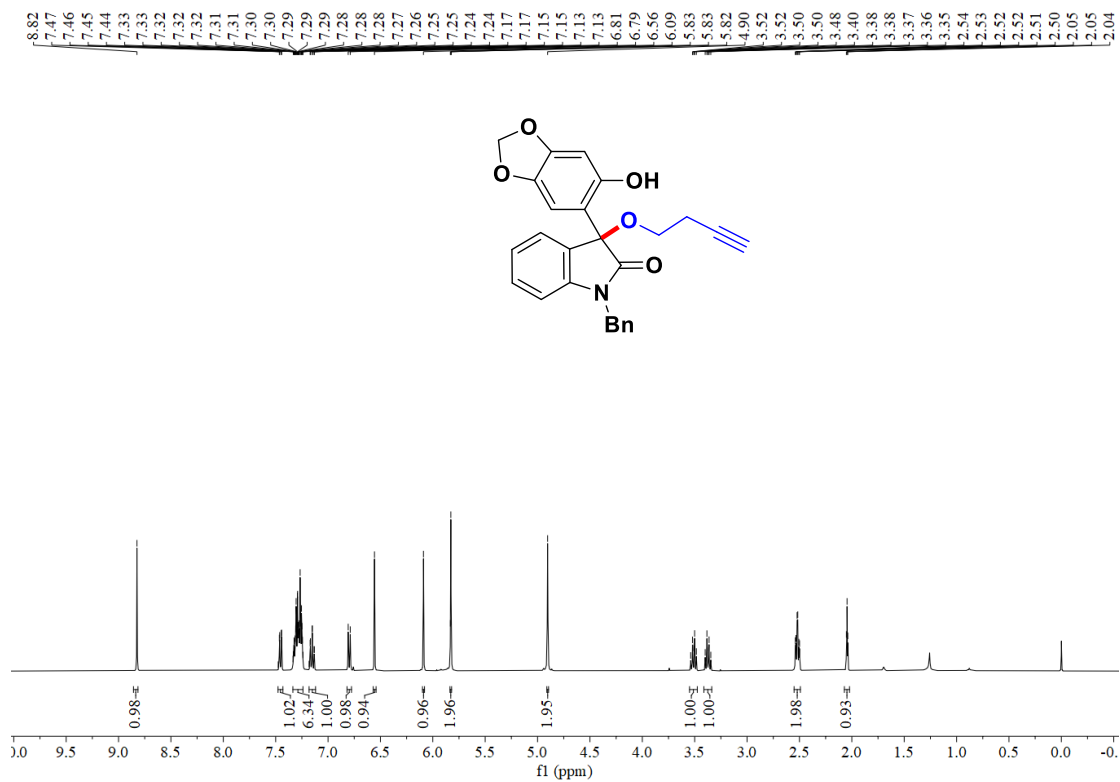

Chemical shifts (ppm): -175.67, 153.55, 149.09, 143.04, 140.59, 135.09, 130.75, 129.00, 128.73, 127.98, 127.30, 126.30, 123.82, 112.96, 110.24, 106.92, 101.32, 100.65, 85.54, 80.27, 70.26, 63.85, 44.14, 19.88.

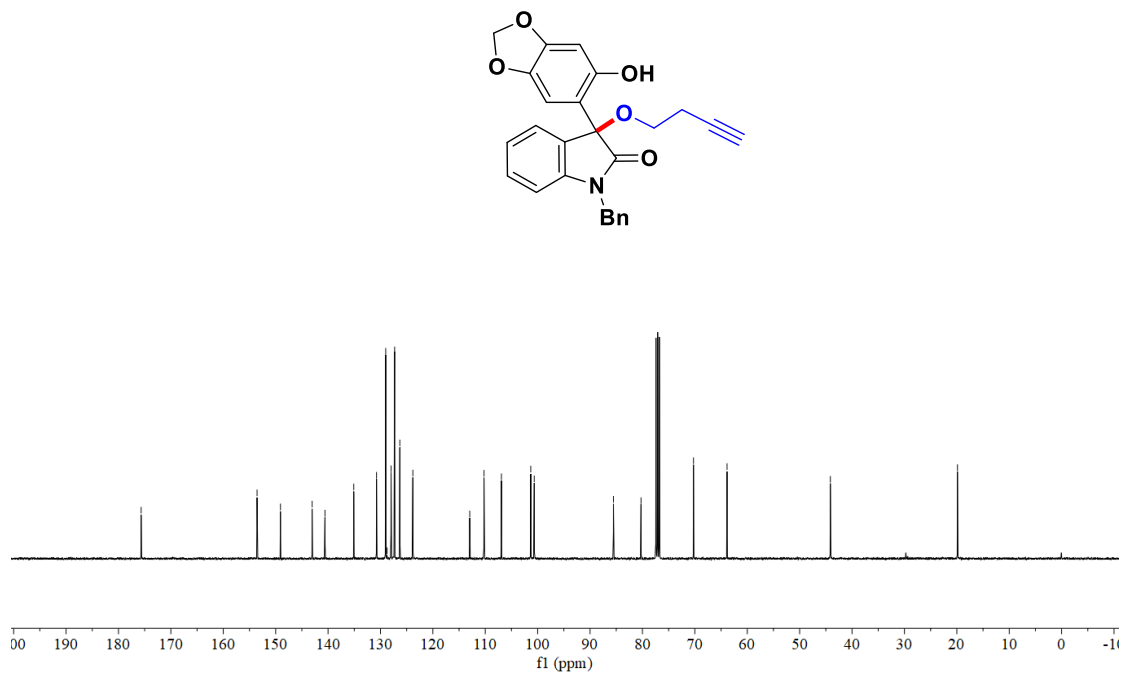

**1-benzyl-3-(but-3-en-1-yloxy)-3-(6-hydroxybenzo[d][1,3]dioxol-5-yl)indolin-2-one (5f)**

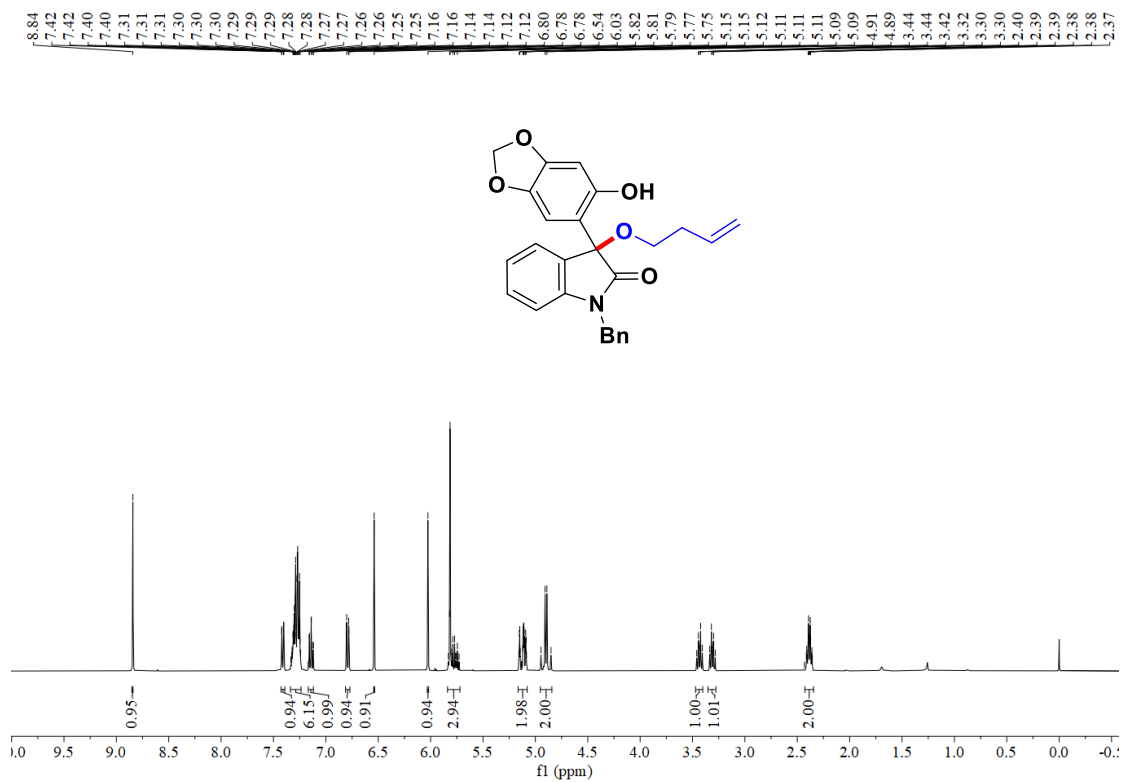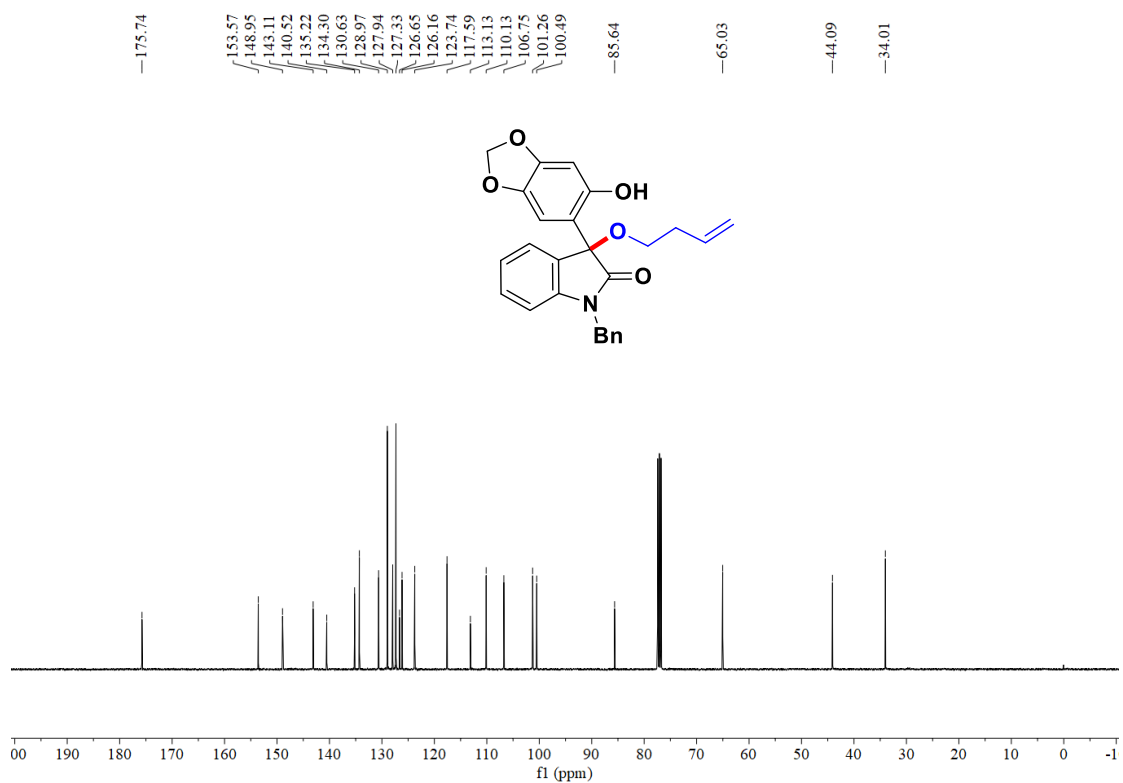



**1-benzyl-3-(but-2-en-1-yloxy)-3-(6-hydroxybenzo[d][1,3]dioxol-5-yl)indolin-2-one (5g)**

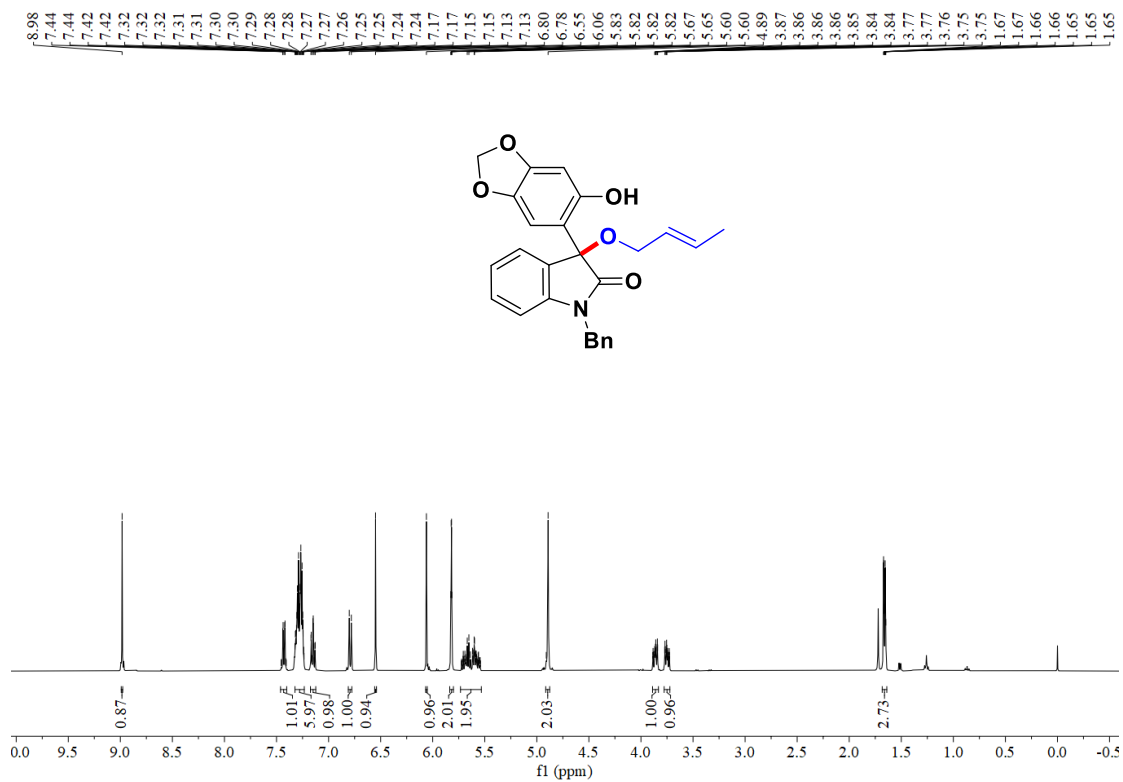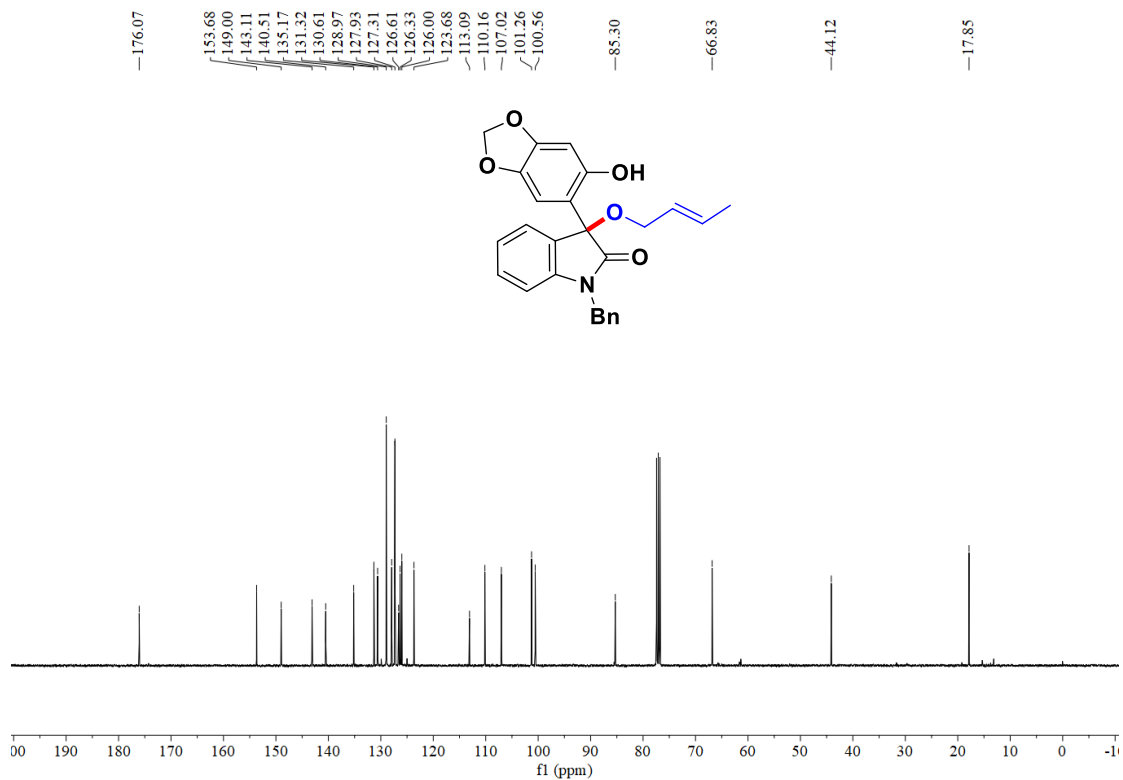

**1-benzyl-3-((3,7-dimethyloct-6-en-1-yl)oxy)-3-(6-hydroxybenzo[d][1,3]dioxol-5-yl)indolin-2-one (5h)**

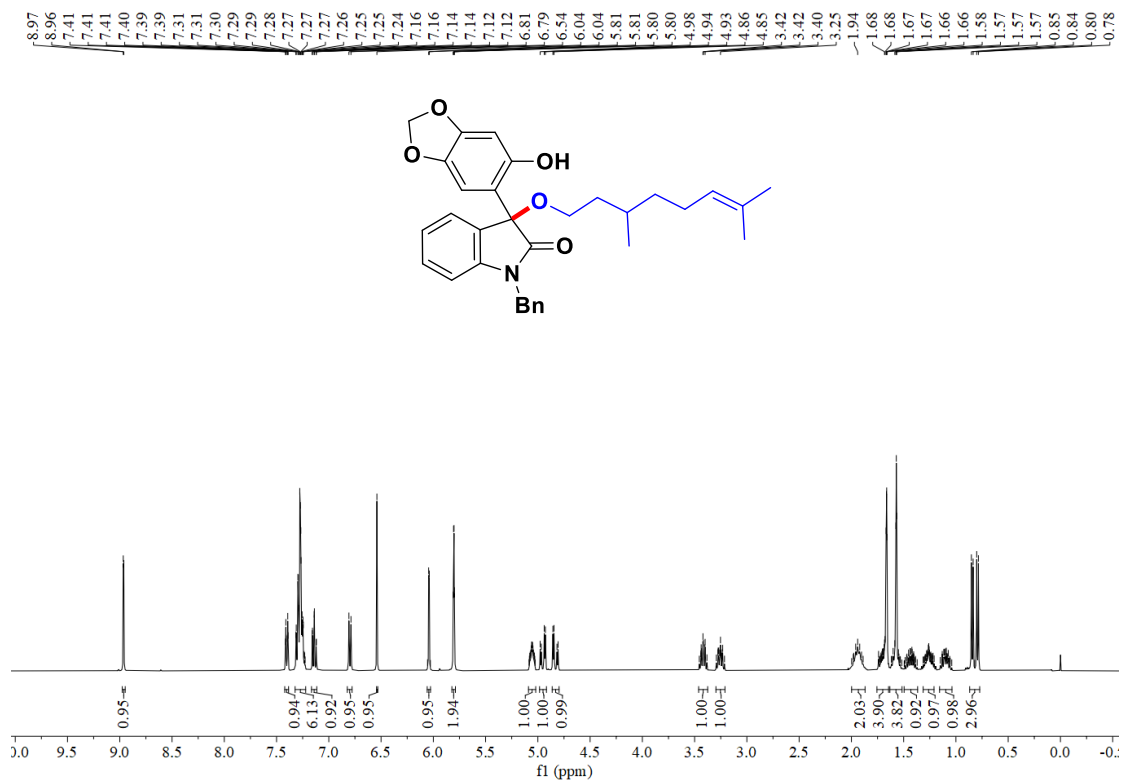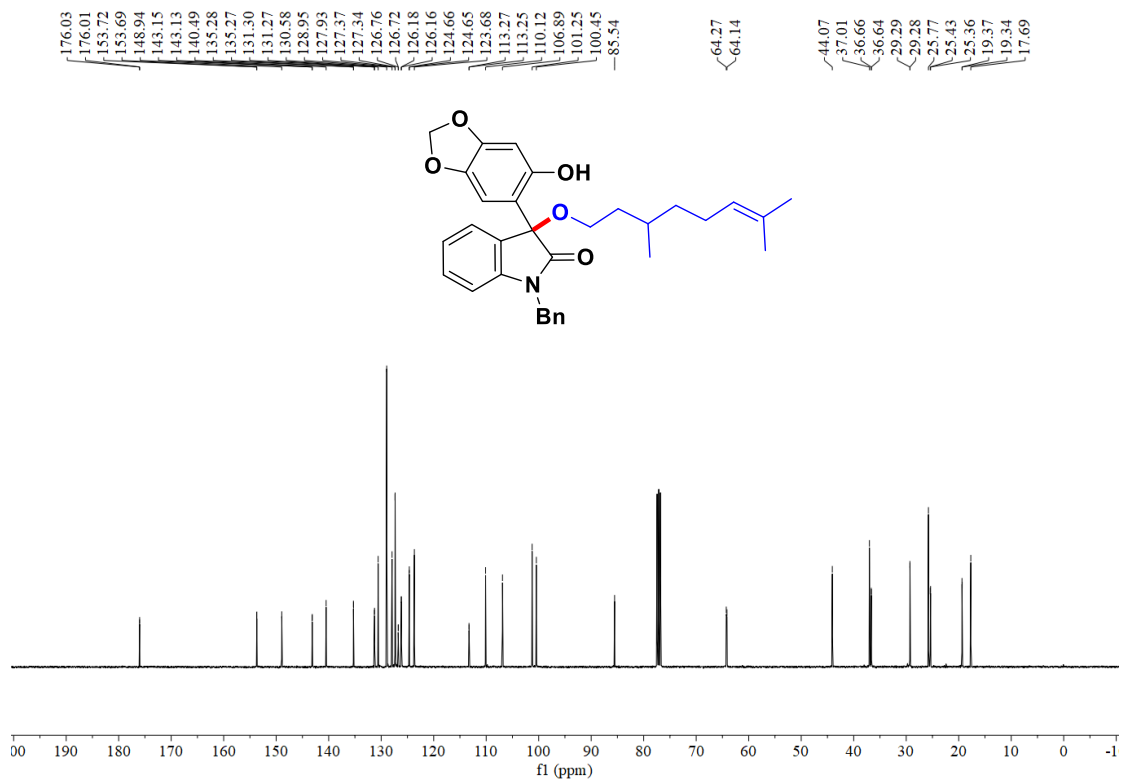

**1-benzyl-3-((3,7-dimethylocta-2,6-dien-1-yl)oxy)-3-(6-hydroxybenzo[*d*][1,3]dioxol-5-yl)indolin-2-one (5i)**

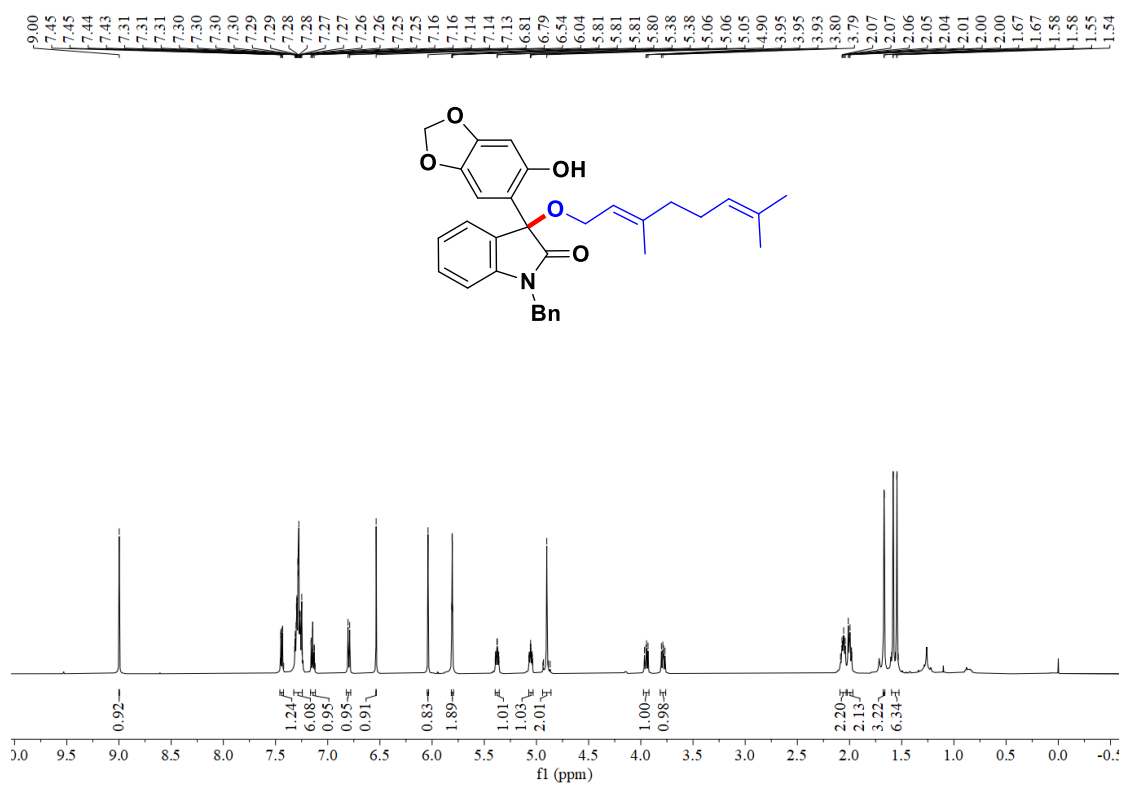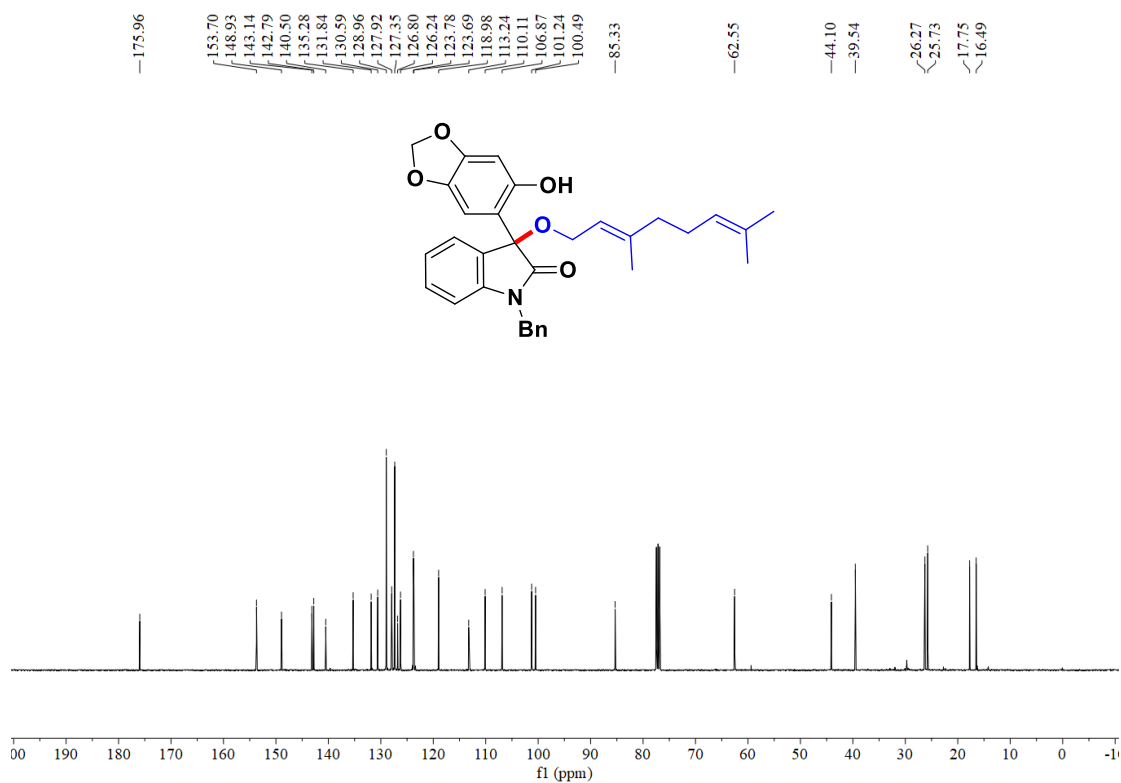

**1-benzyl-3-(6-hydroxybenzo[d][1,3]dioxol-5-yl)-3-(((2E,6E)-3,7,11-trimethyldodeca-2,6,10-trien-1-yl)oxy)indolin-2-one (5j)**

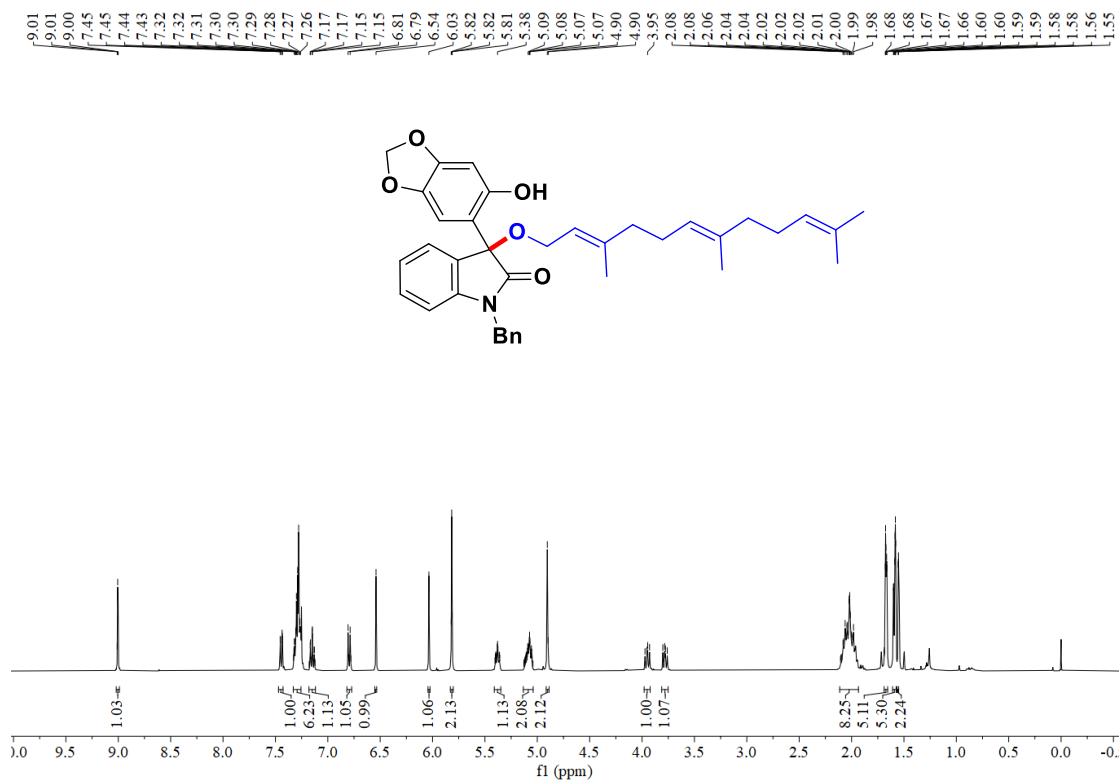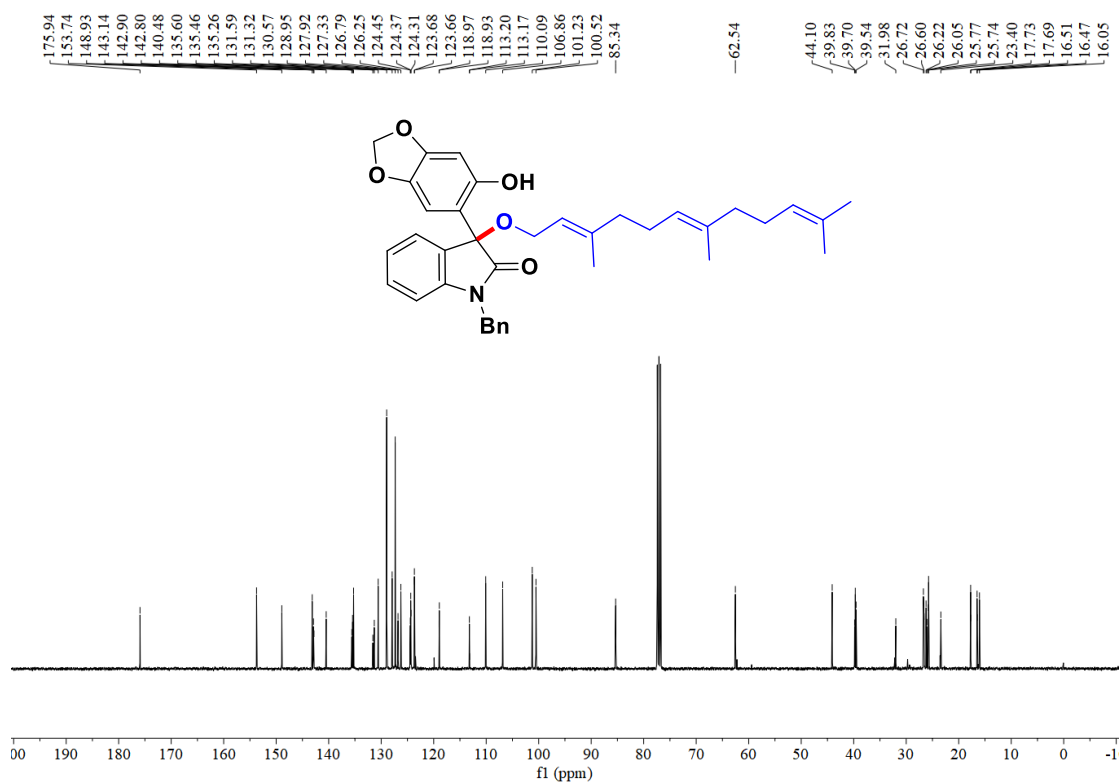

# 1-benzyl-3-(ethylthio)-3-(6-hydroxybenzo[d][1,3]dioxol-5-yl)indolin-2-one (6a)

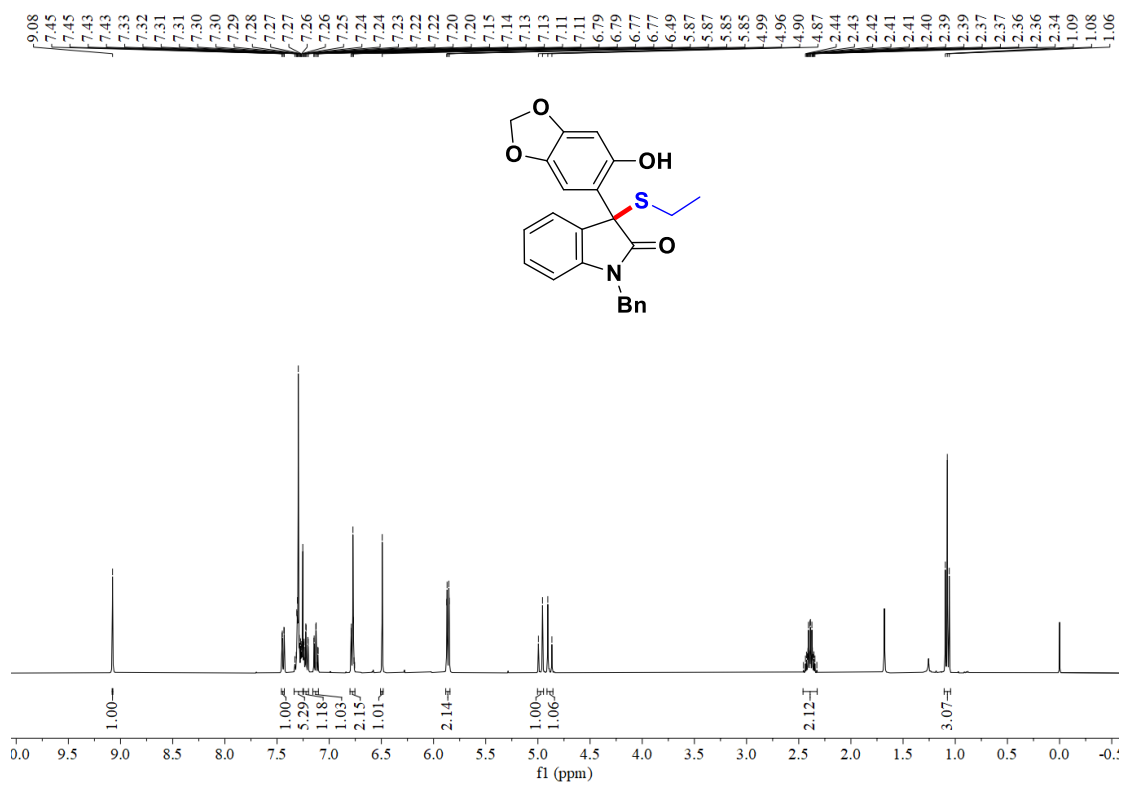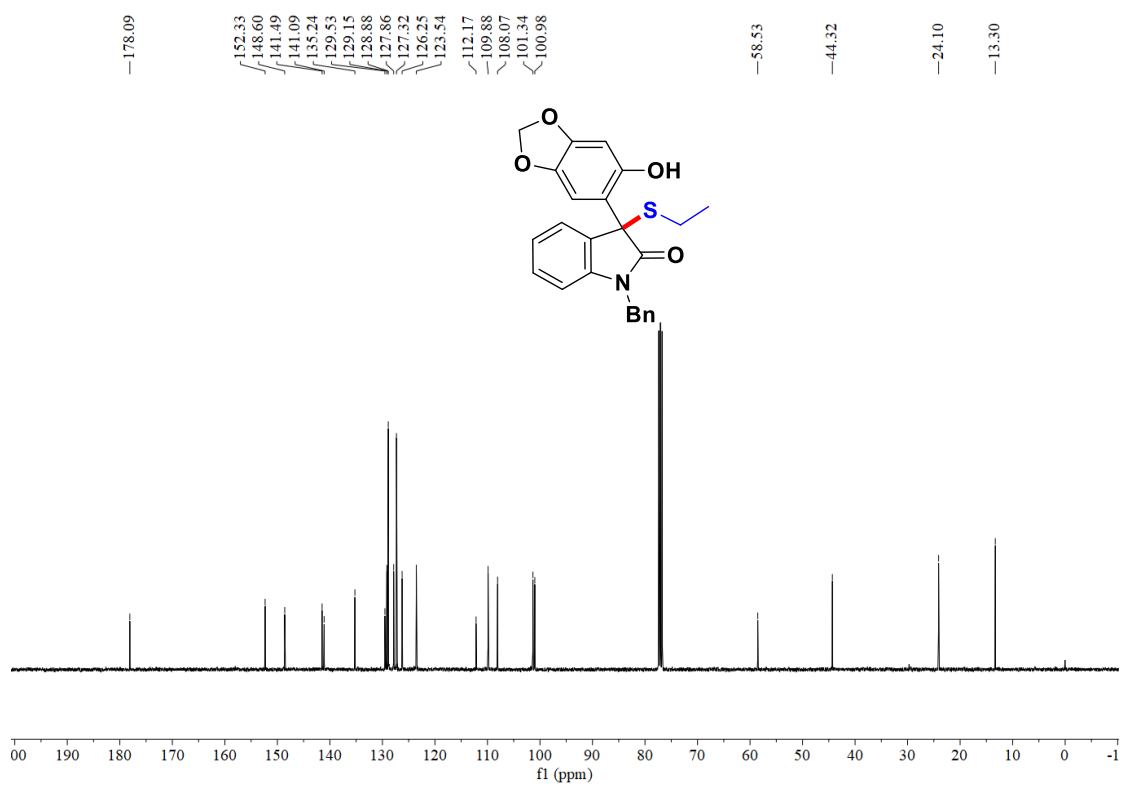

1-benzyl-3-(6-hydroxybenzo[*d*][1,3]dioxol-5-yl)-3-(propylthio)indolin-2-one (6b)

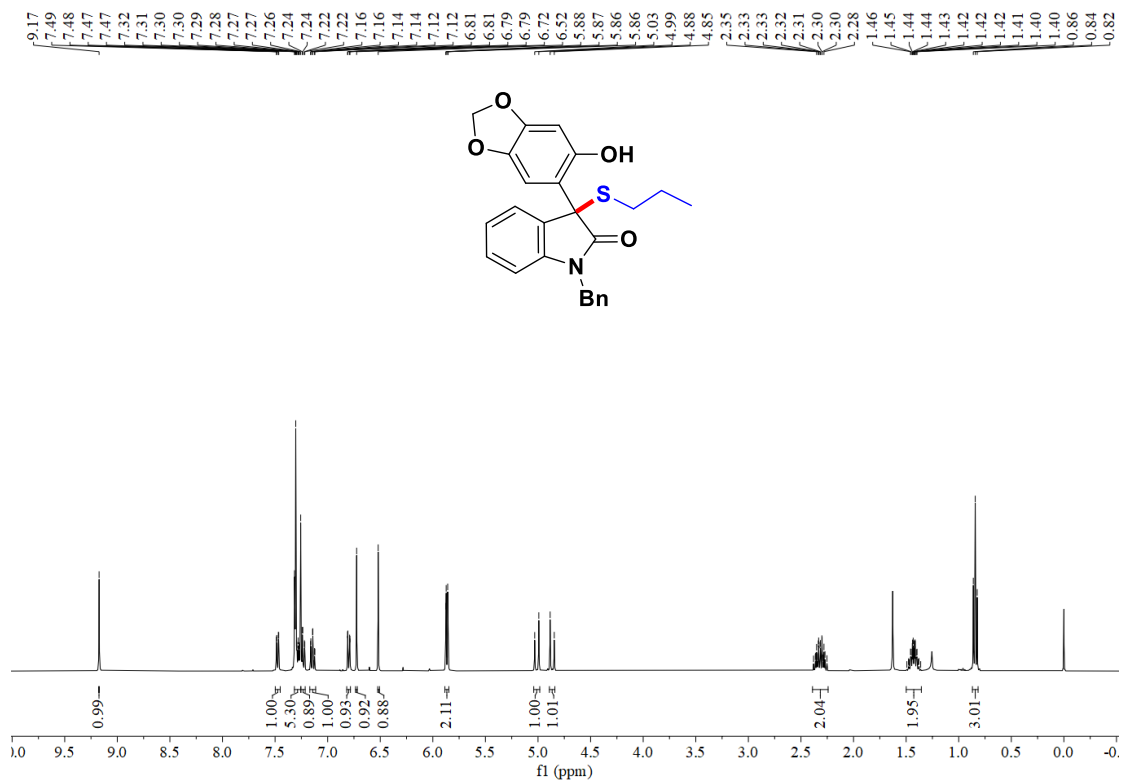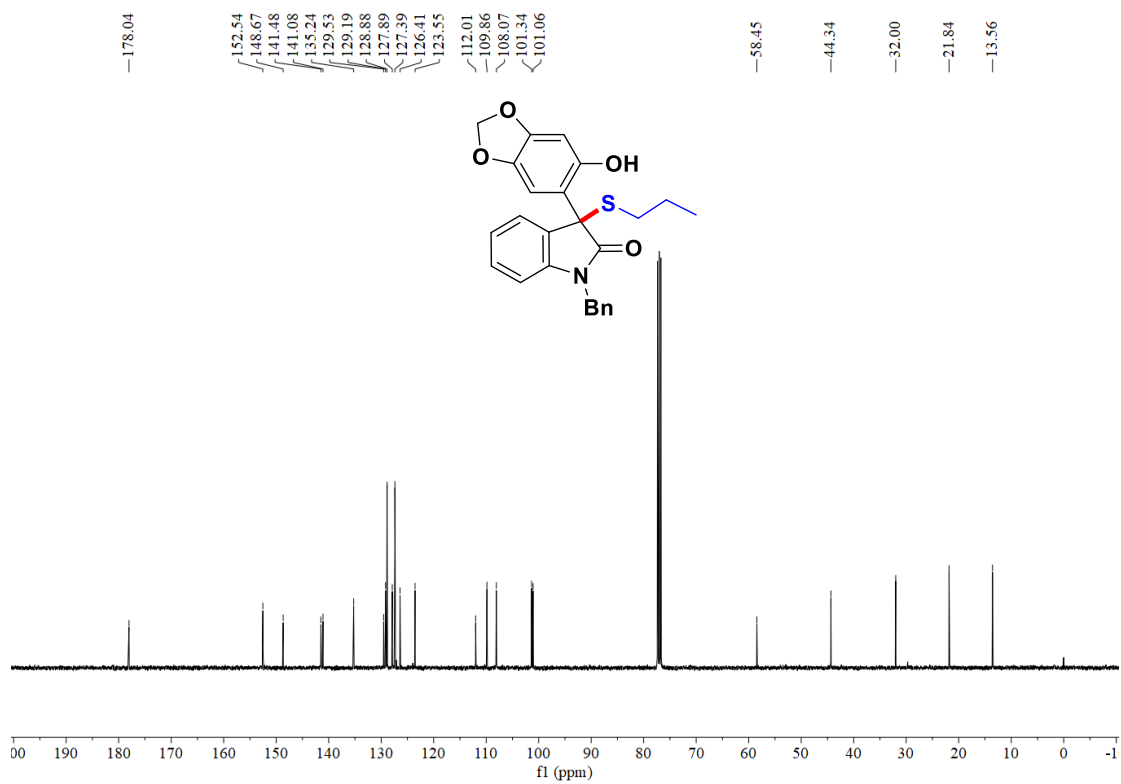

**1-benzyl-3-(6-hydroxybenzo[*d*][1,3]dioxol-5-yl)-3-(pentylthio)indolin-2-one (5c)**

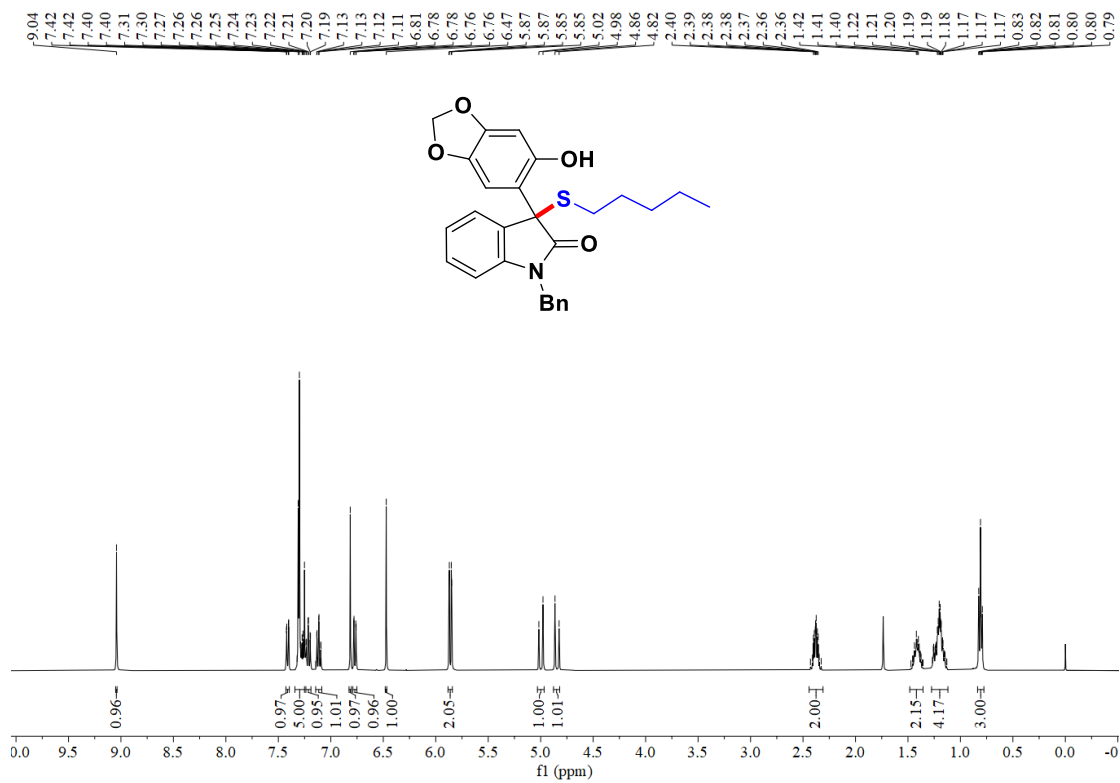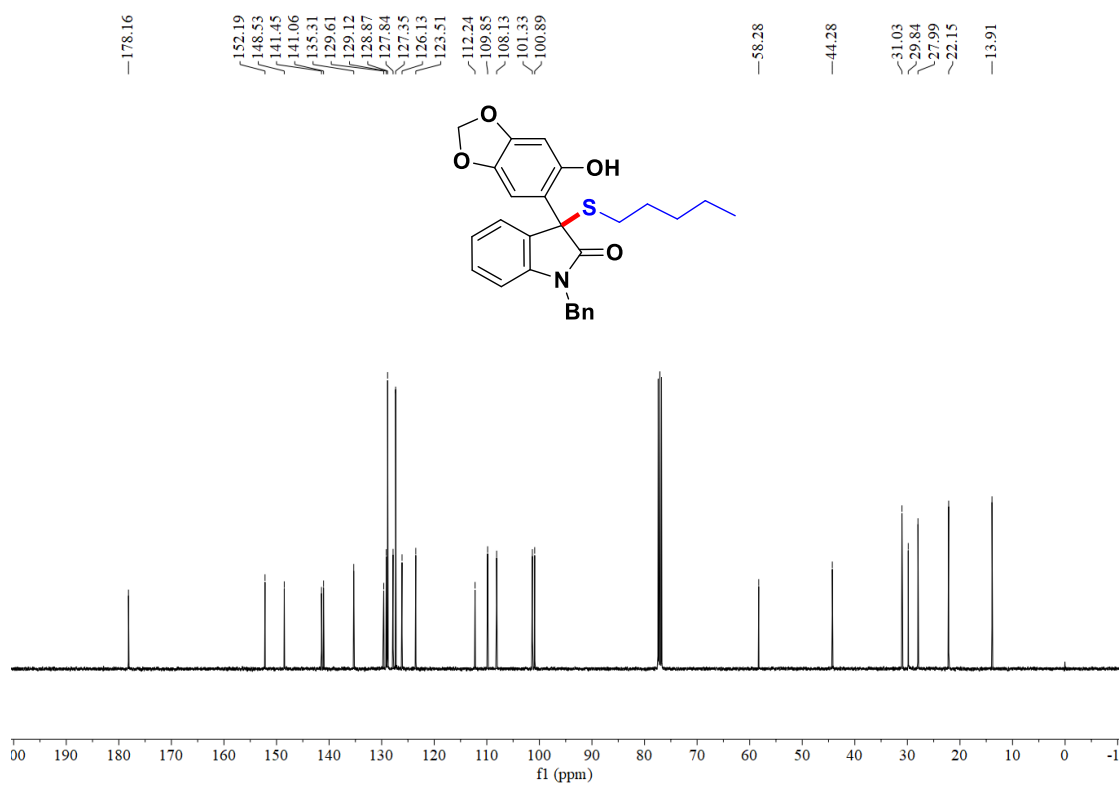

**1-benzyl-3-(6-hydroxybenzo[d][1,3]dioxol-5-yl)-3-(phenethylthio)indolin-2-one  
(6d)**

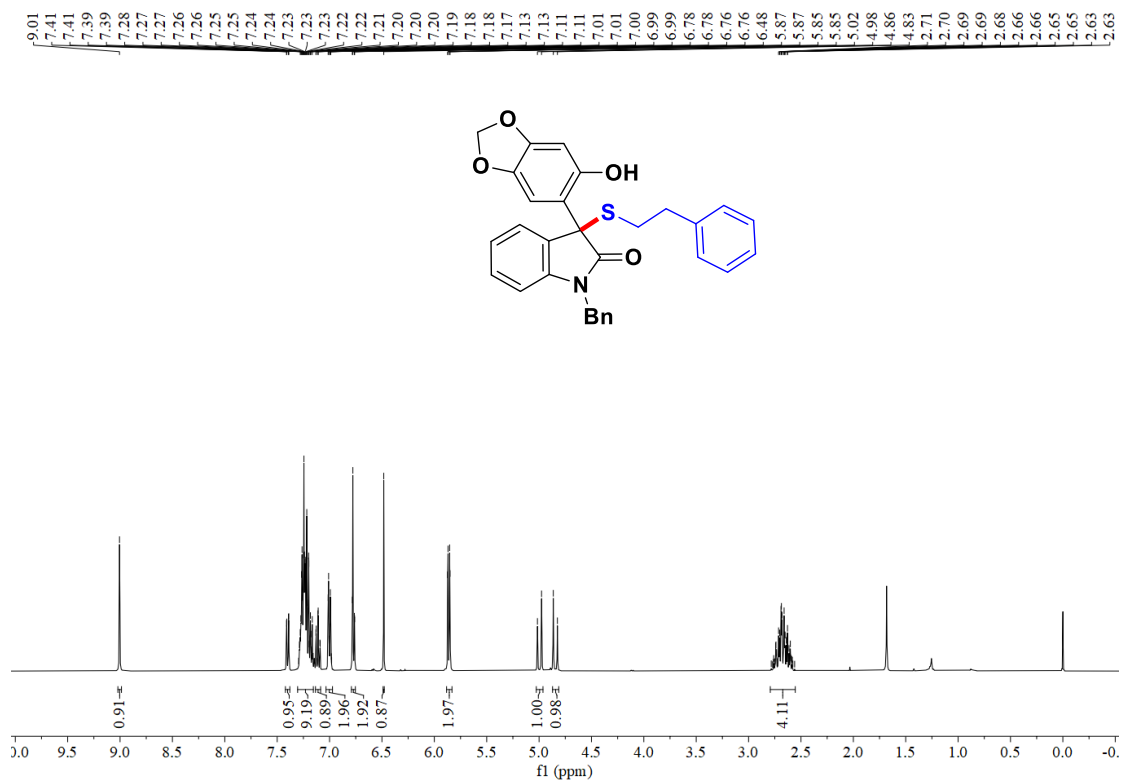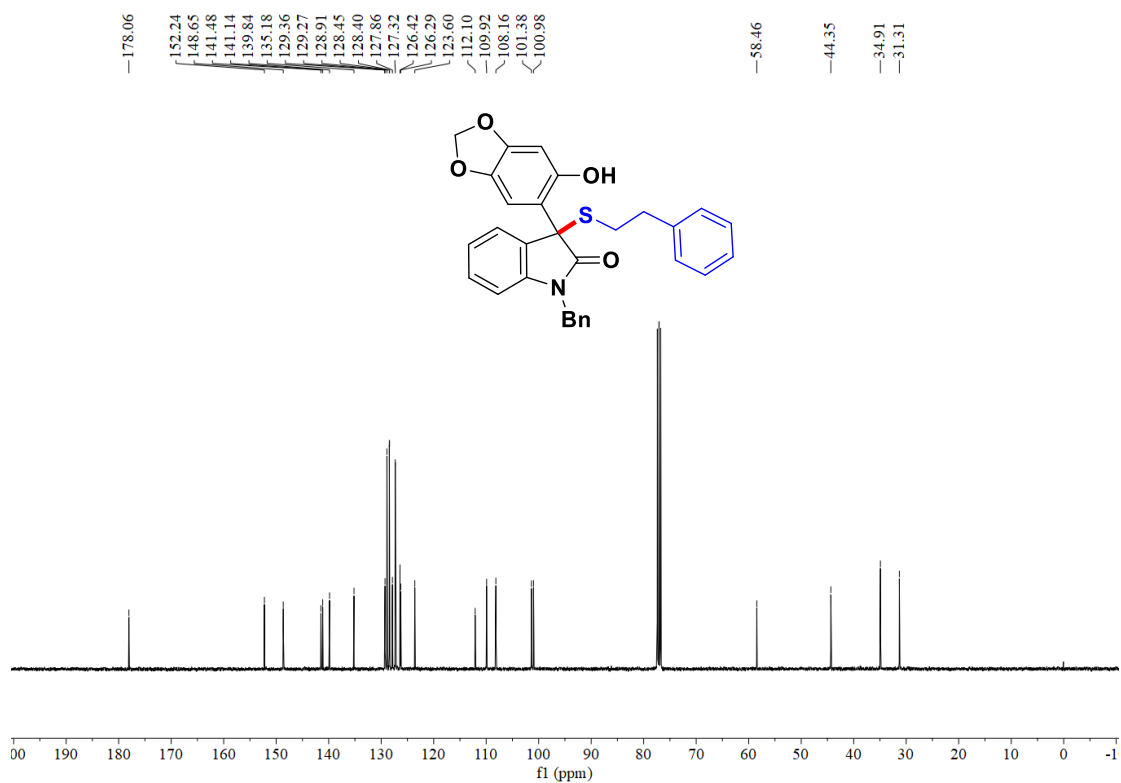



**1-benzyl-3-((furan-2-ylmethyl)thio)-3-(6-hydroxybenzo[d][1,3]dioxol-5-yl)indolin-2-one (6e)**

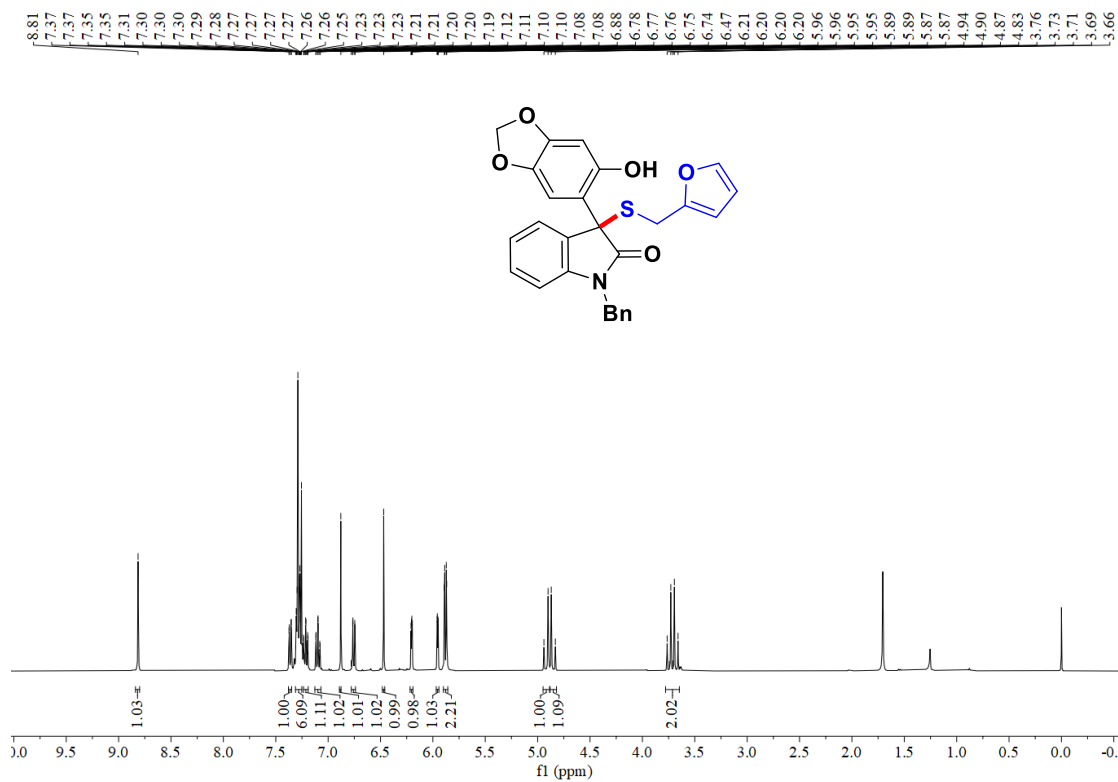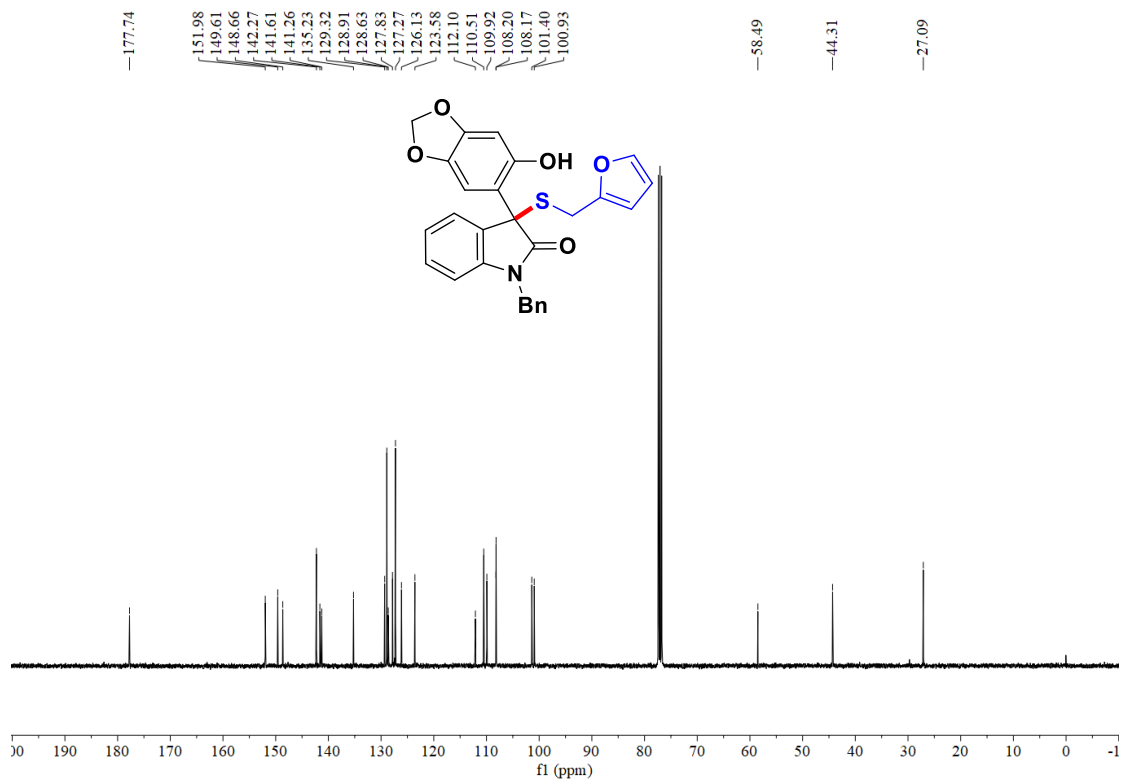

# 1-benzyl-3-(6-hydroxybenzo[d][1,3]dioxol-5-yl)-3-(p-tolylthio)indolin-2-one (6f)

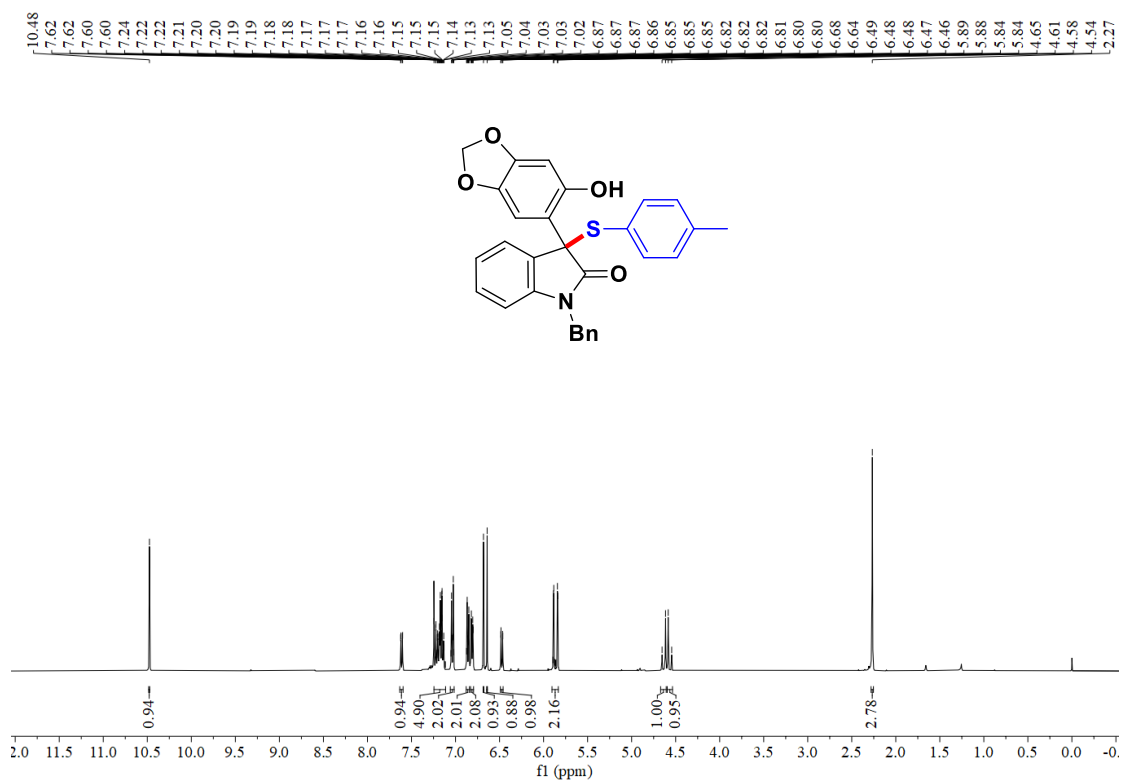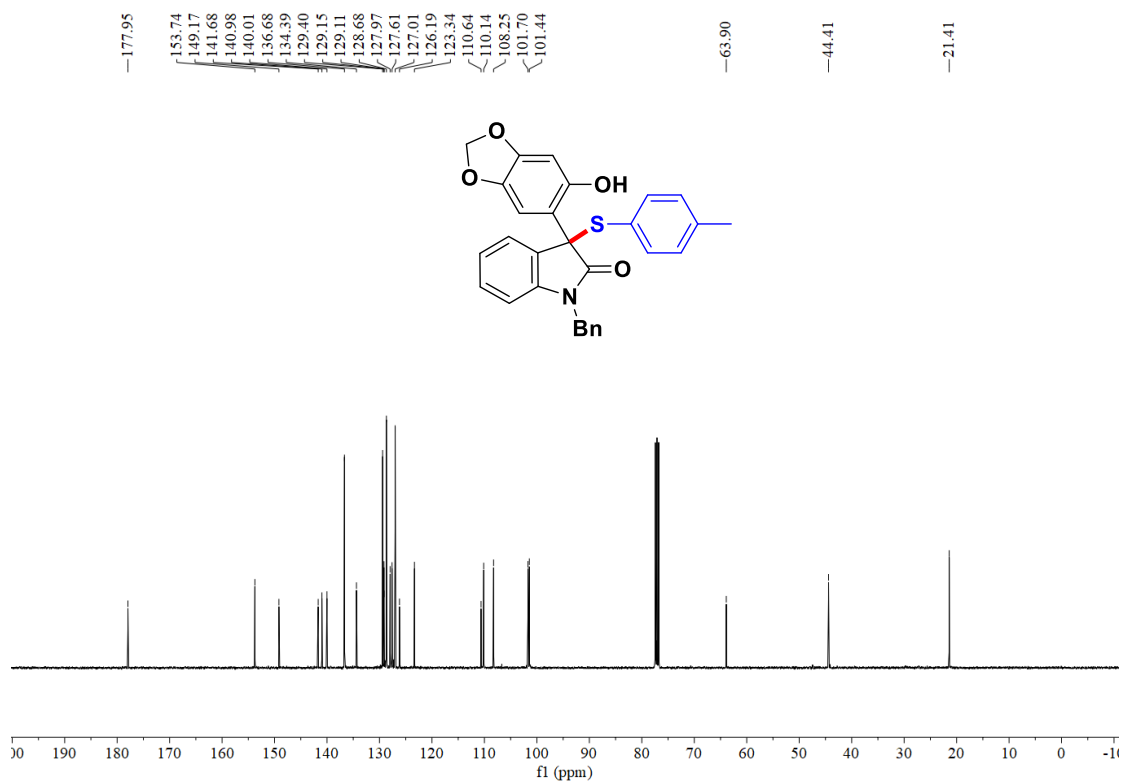

**3-(2-hydroxy-5-methoxyphenyl)-5-methoxy-3-(2,4,6-trimethoxyphenyl)benzofuran-2(3H)-one (8a)**

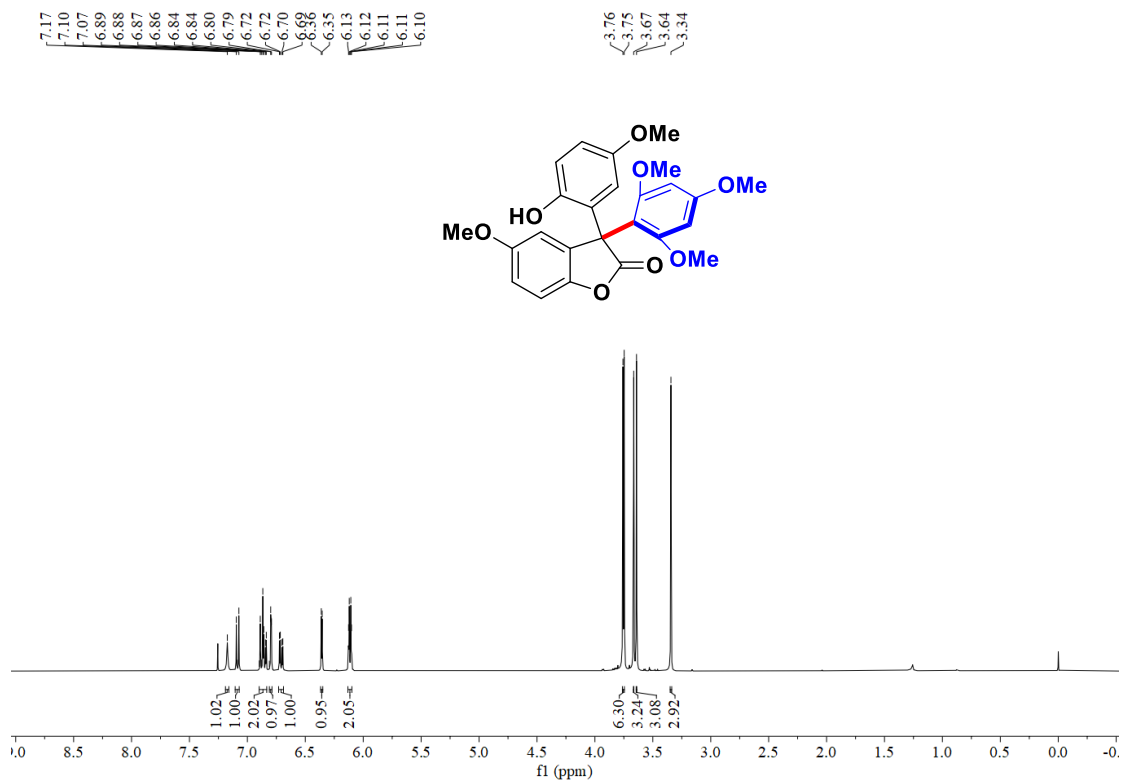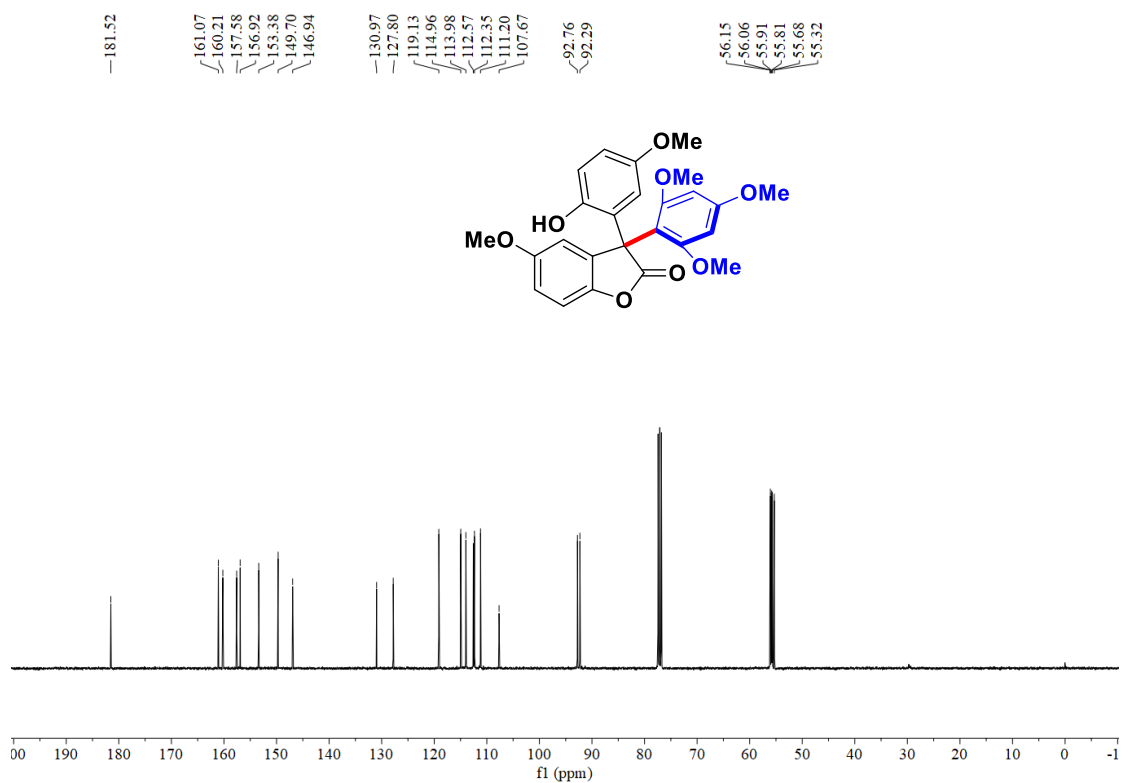

**3-(4-(diallylamino)phenyl)-3-(2-hydroxy-5-methoxyphenyl)-5-methoxybenzofuran-2(3H)-one (8b)**

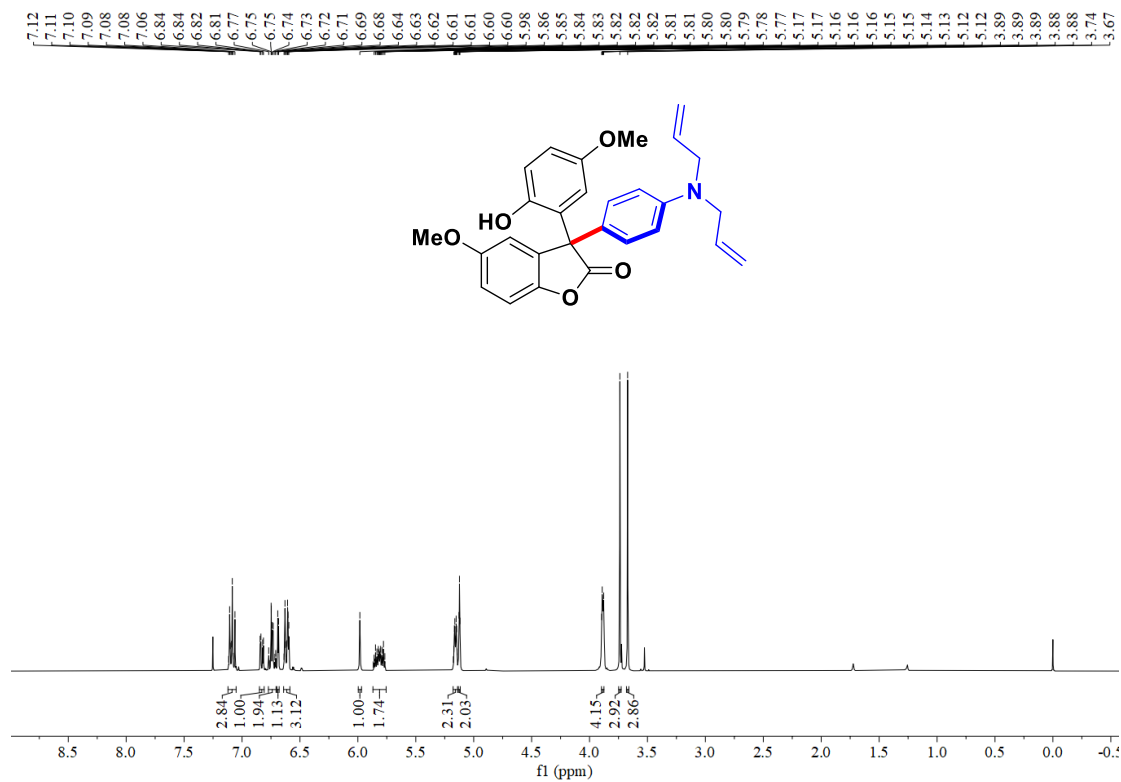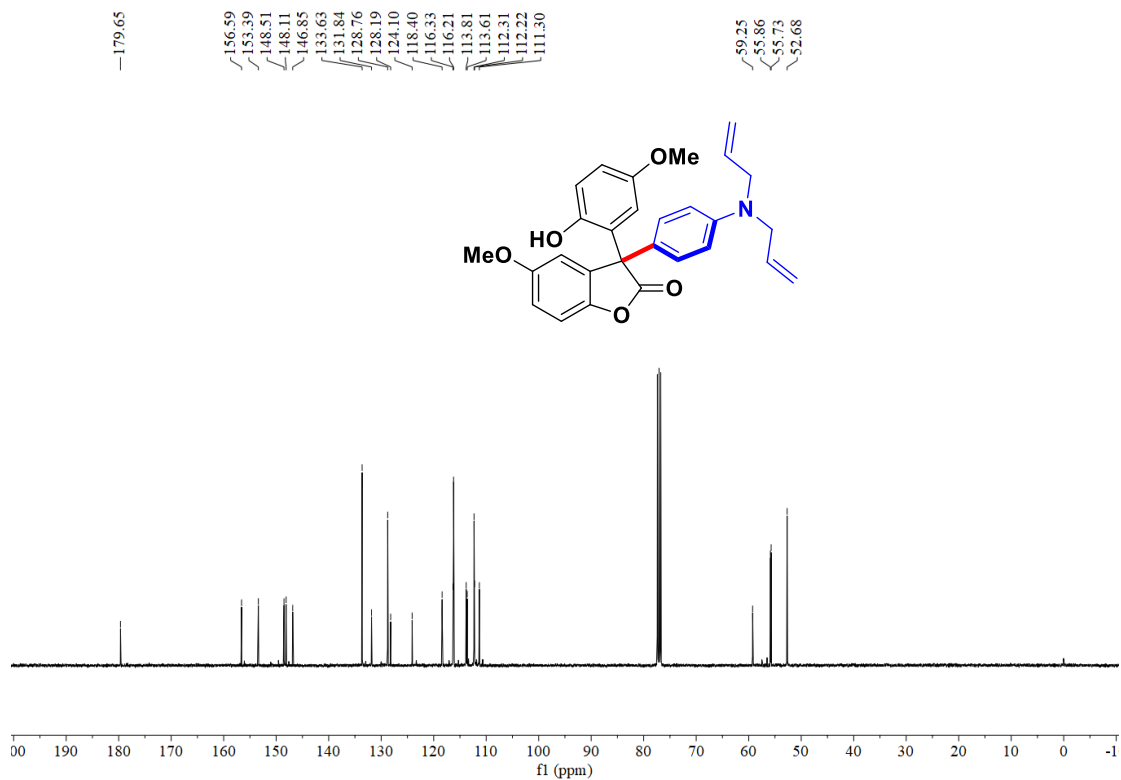

**3-(2-hydroxy-5-methoxyphenyl)-3-(1*H*-indol-3-yl)-5-methoxybenzofuran-2(3*H*)-one (8c)**

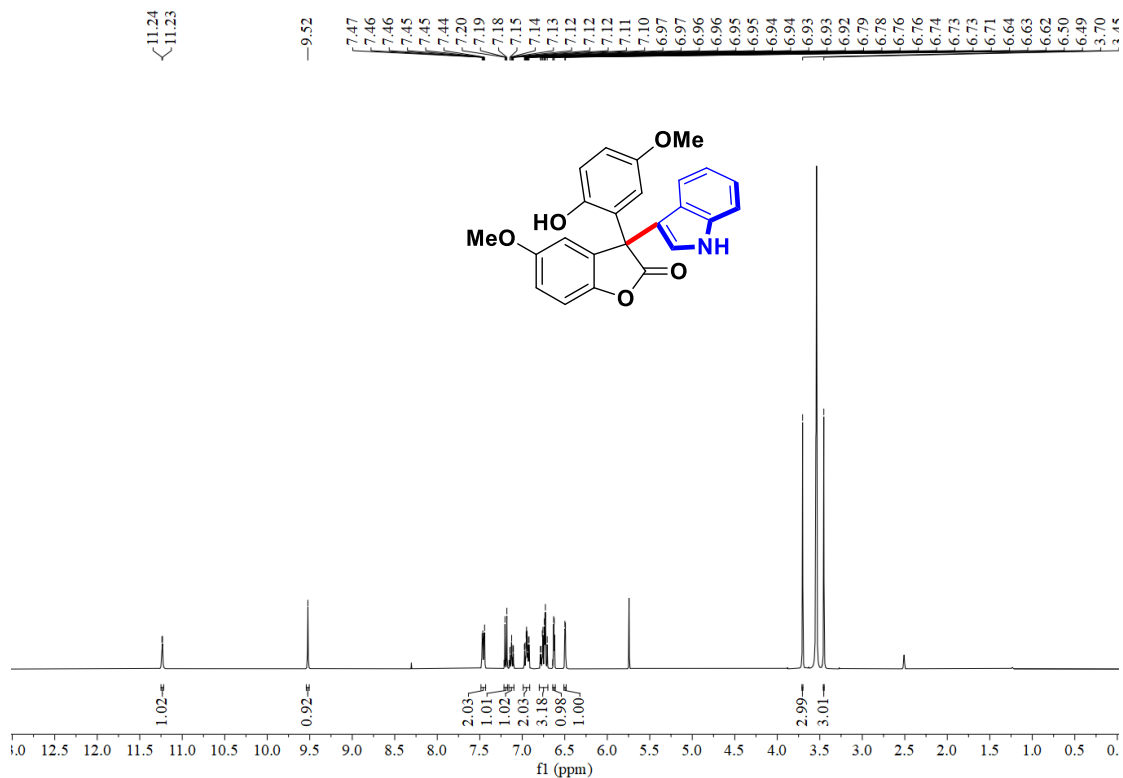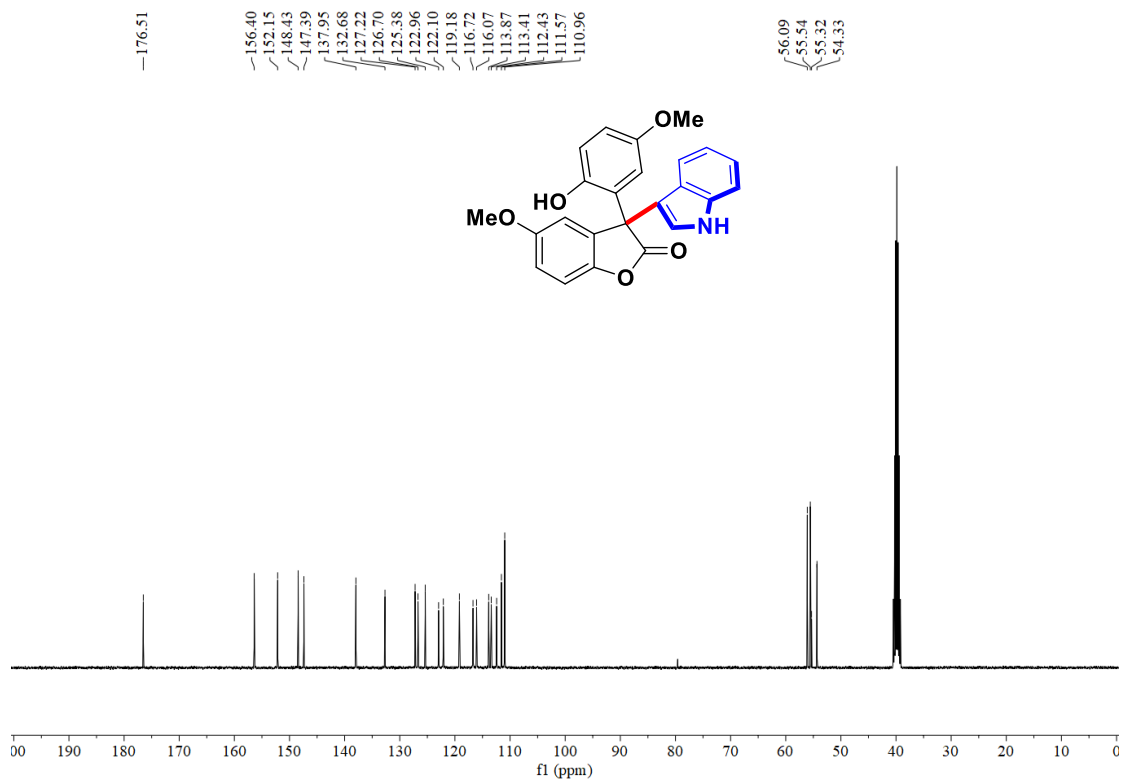

**3-(2-hydroxy-5-methoxyphenyl)-5-methoxy-3-(pyrrolidin-1-yl)benzofuran-2(3H)-one (8d)**

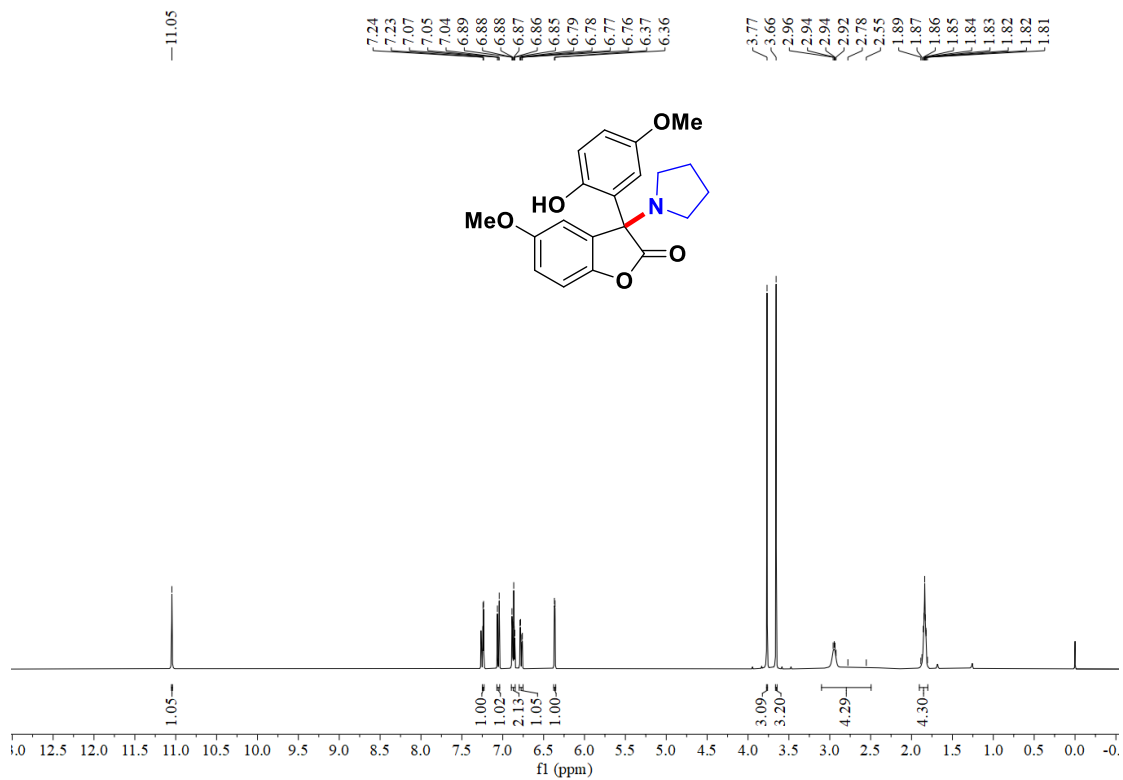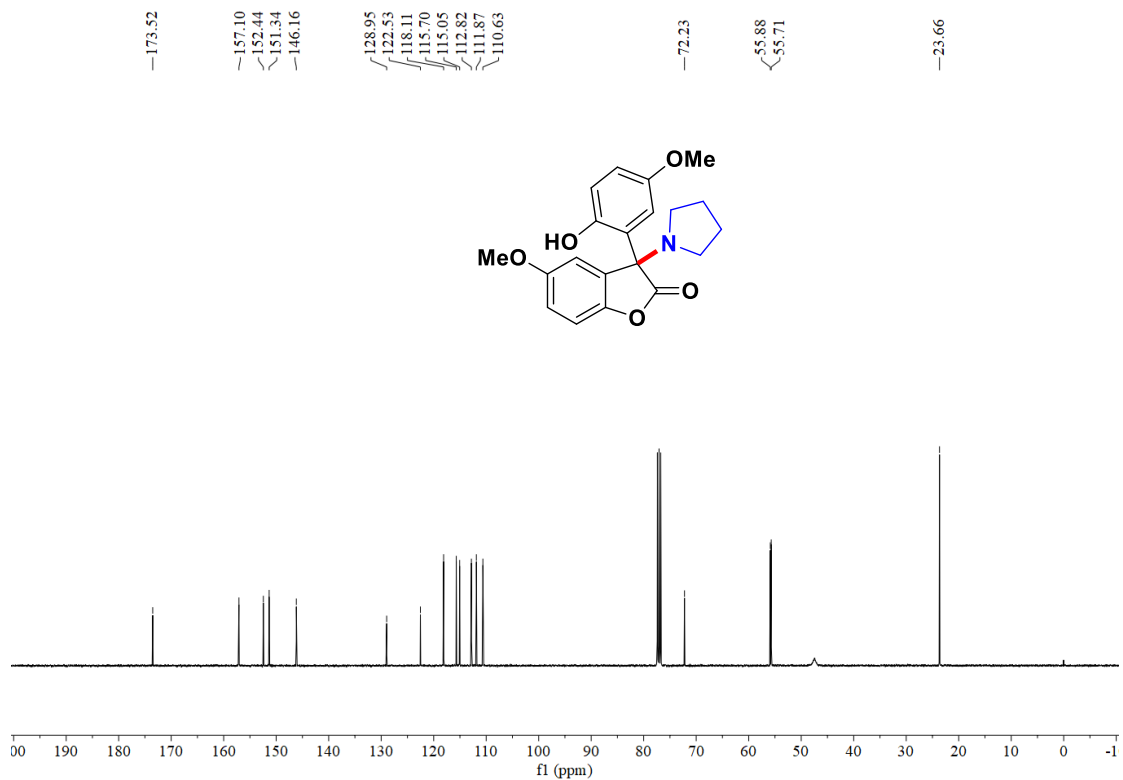

**3-(dimethylamino)-3-(2-hydroxy-5-methoxyphenyl)-5-methoxybenzofuran-2(3H)-one (8e)**

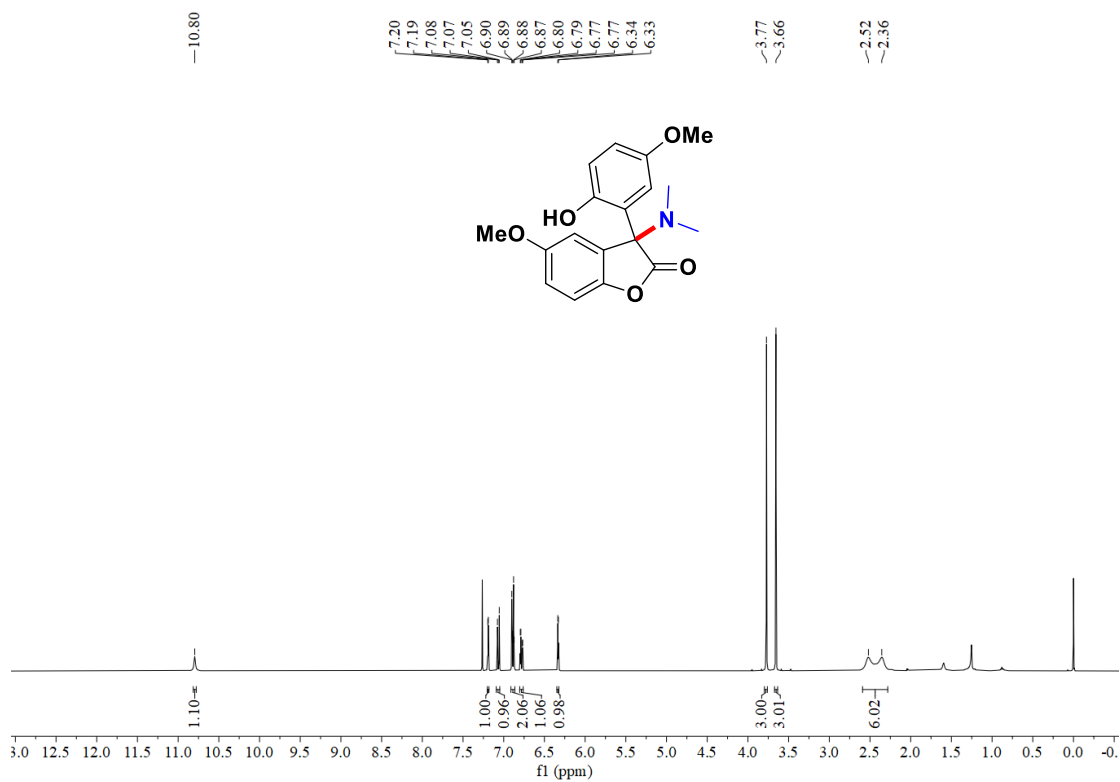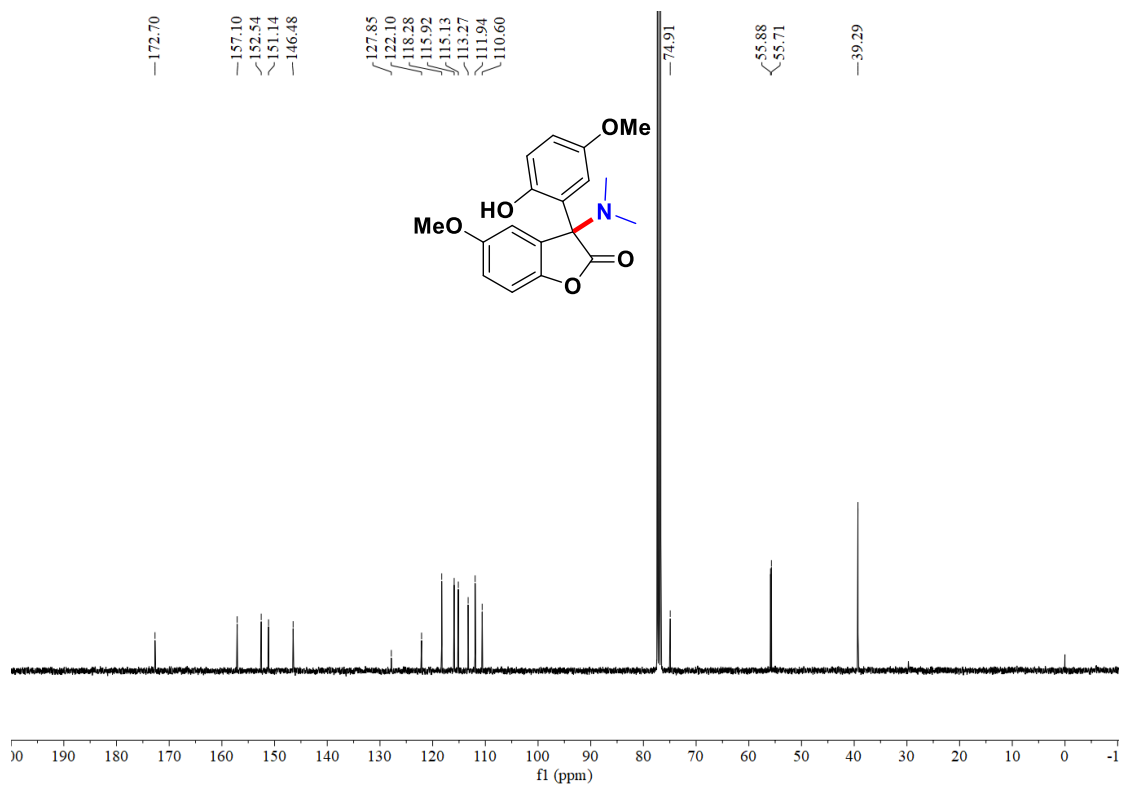

**3-ethoxy-3-(2-hydroxy-5-methoxyphenyl)-5-methoxybenzofuran-2(3H)-one (8f)**

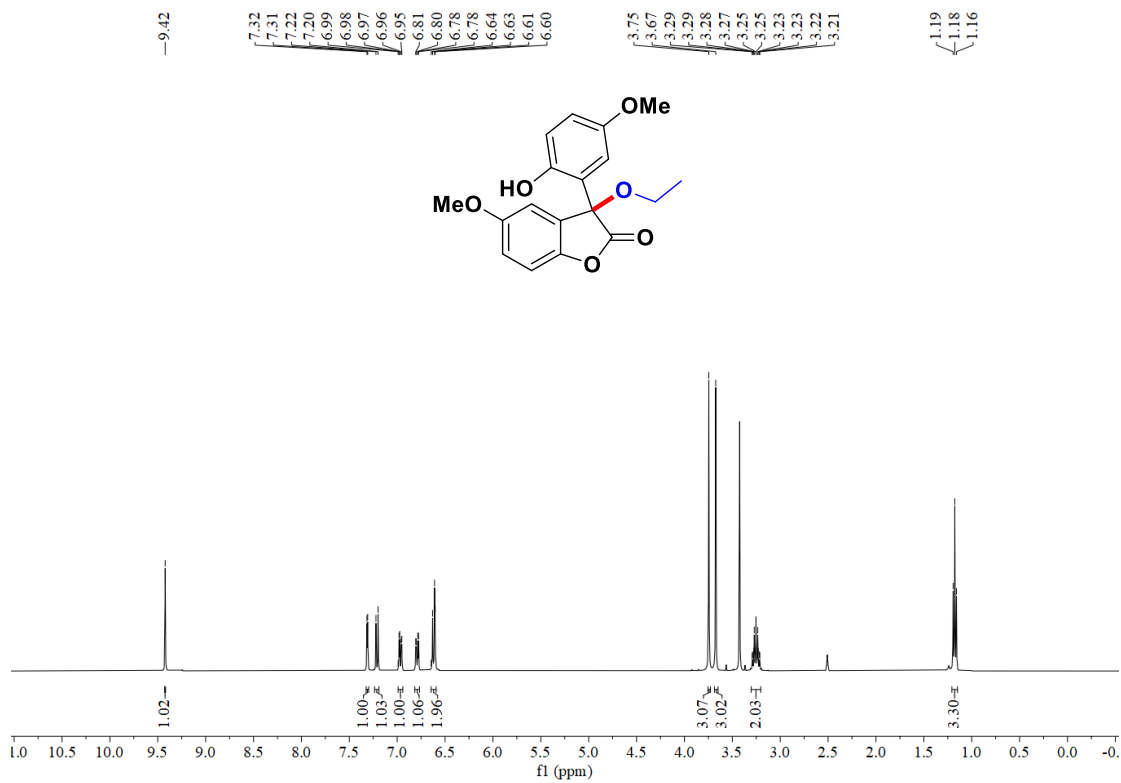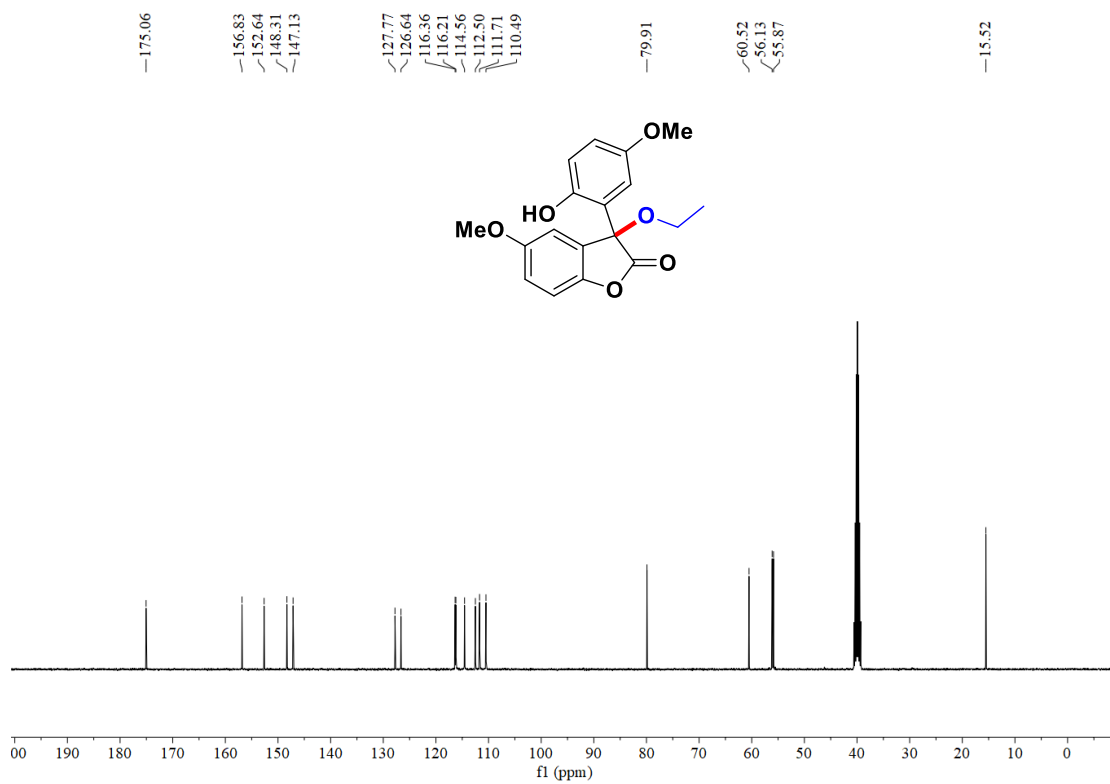



**N,N-diallyl-4-(6-benzyl-5a,6-dihydro-10bH-[1,3]dioxolo[4',5':5,6]benzofuro[2,3-b]indol-10b-yl)aniline (11a)**

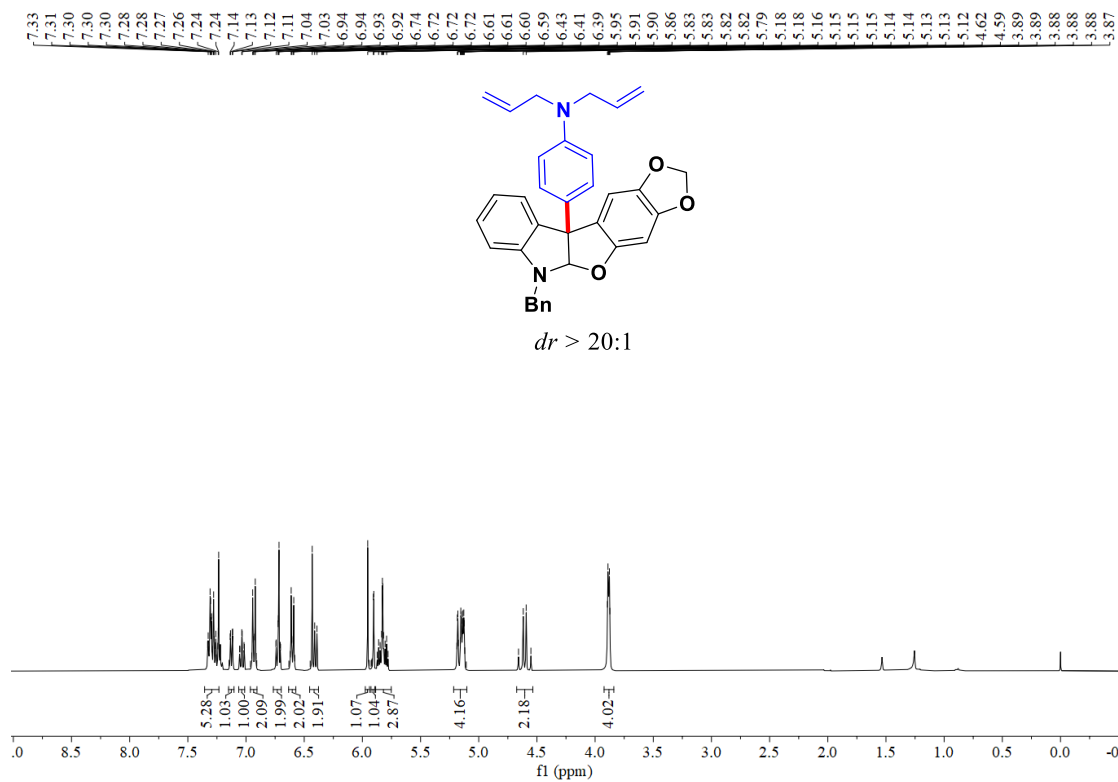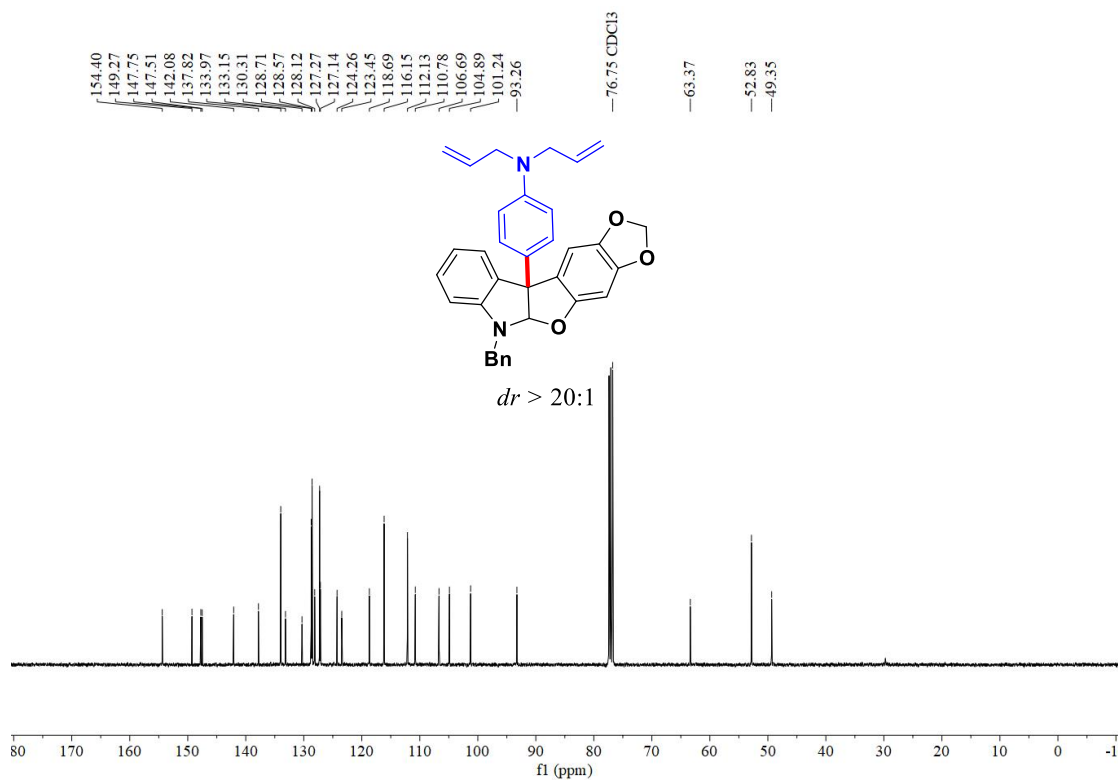

**N,N-diallyl-4-((10bR)-6-benzyl-5a,6-dihydro-10bH-[1,3]dioxolo[4',5':5,6]benzofuro[2,3-b]indol-10b-yl-5a-d)aniline (11b)**

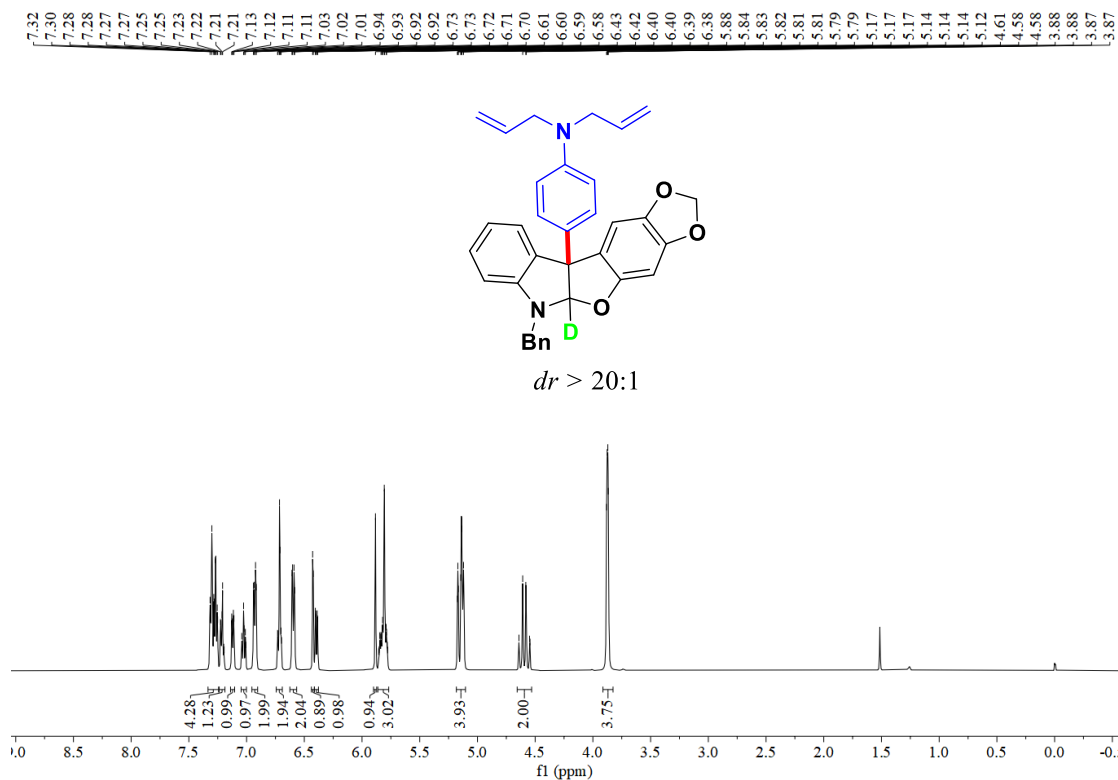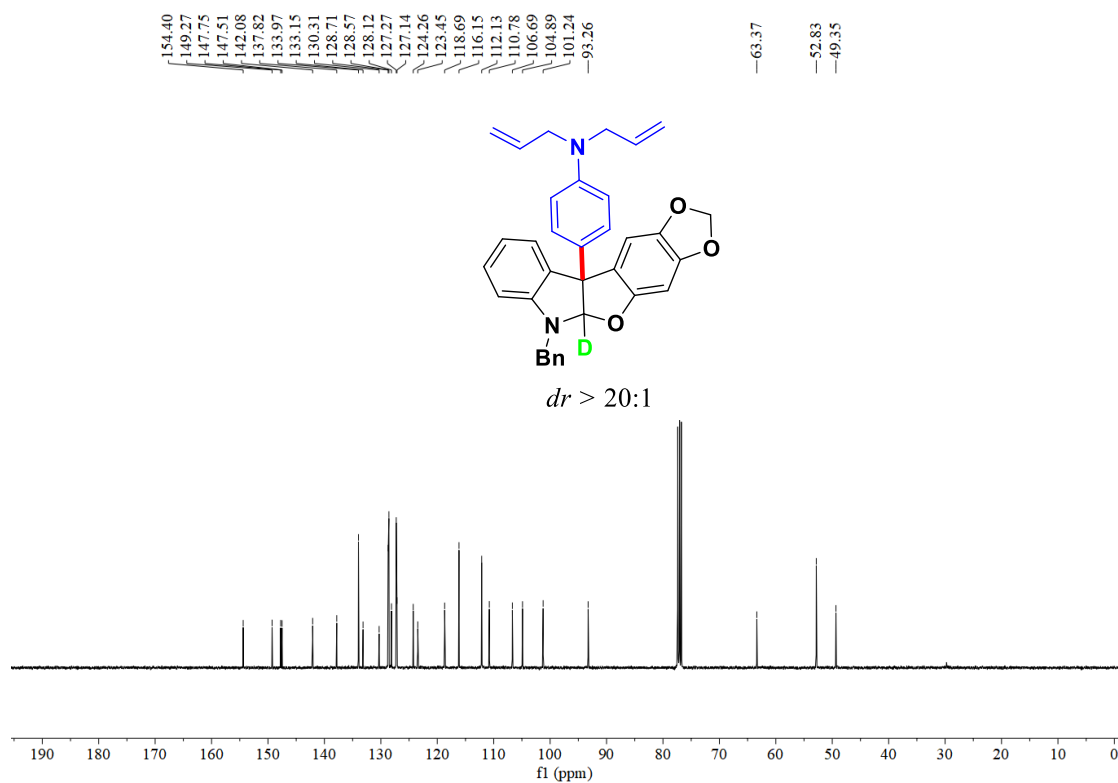

**6-benzyl-10b-(1H-indol-3-yl)-5a,10b-dihydro-6H-[1,3]dioxolo[4',5':5,6]benzofuro[2,3-b]indole (11c)**

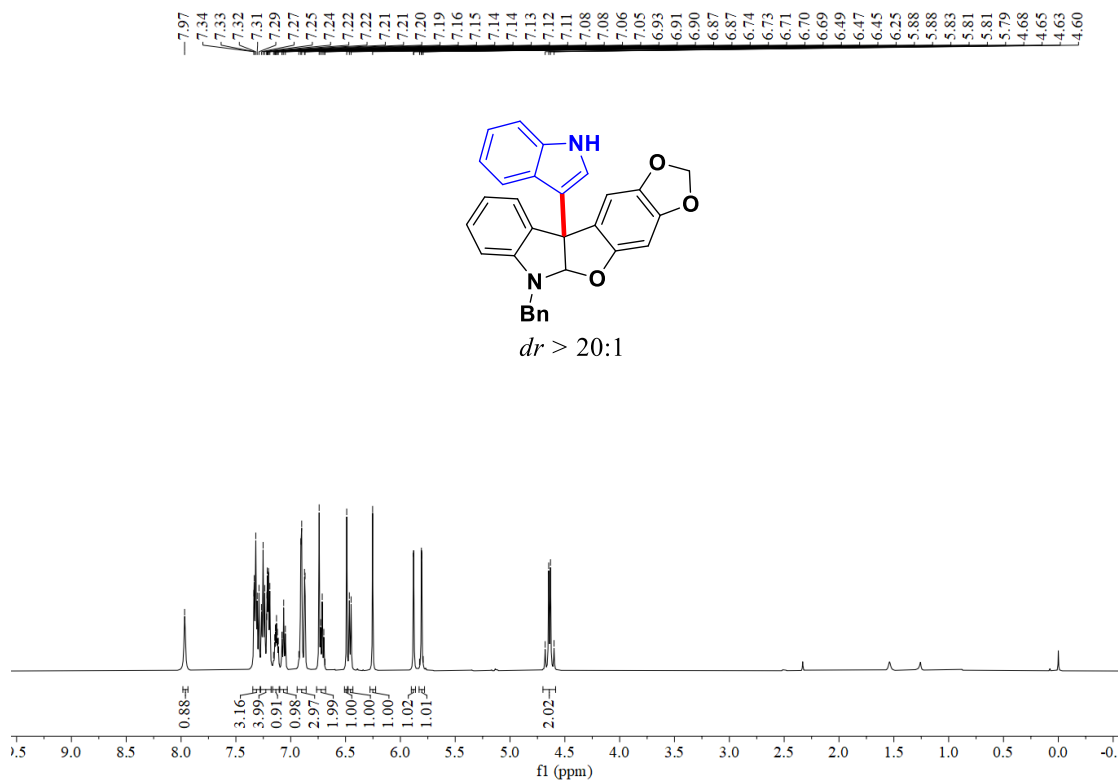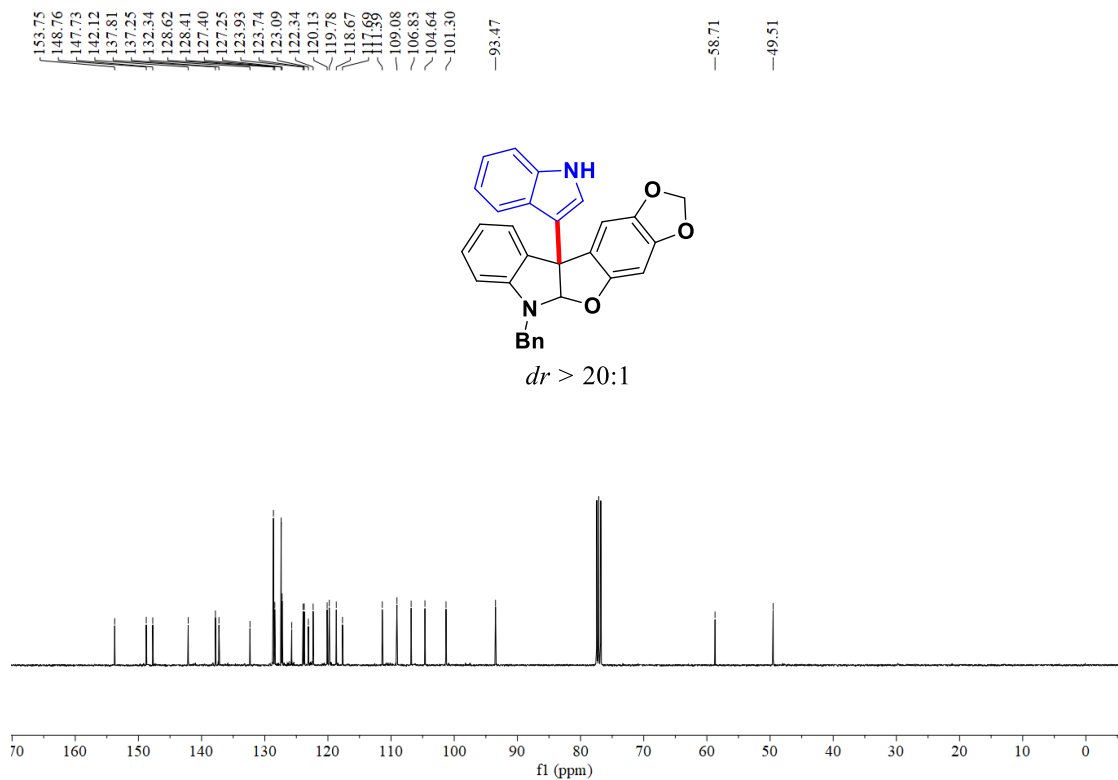

**N,N-diallyl-4-(5a-allyl-6-benzyl-5a,6-dihydro-10bH-[1,3]dioxolo[4',5':5,6]benzofuro[2,3-b]indol-10b-yl)aniline (11d)**

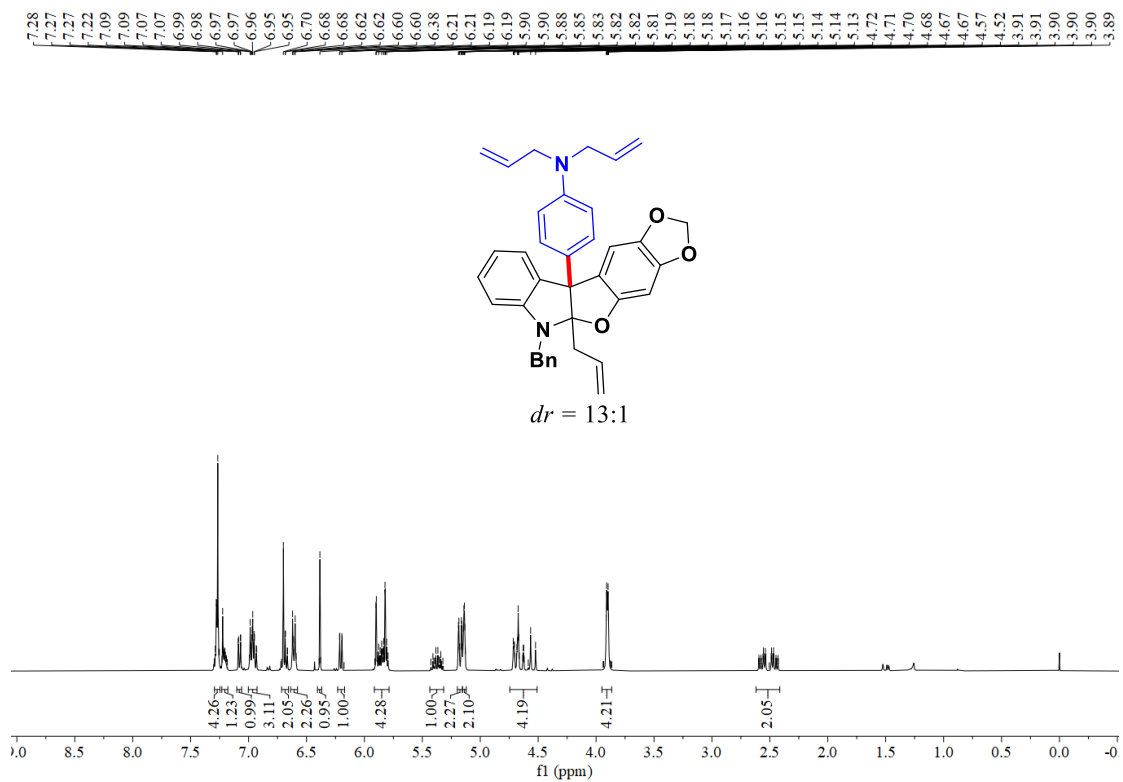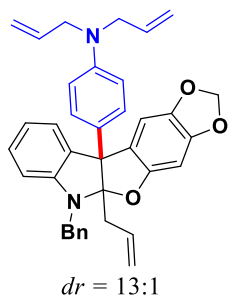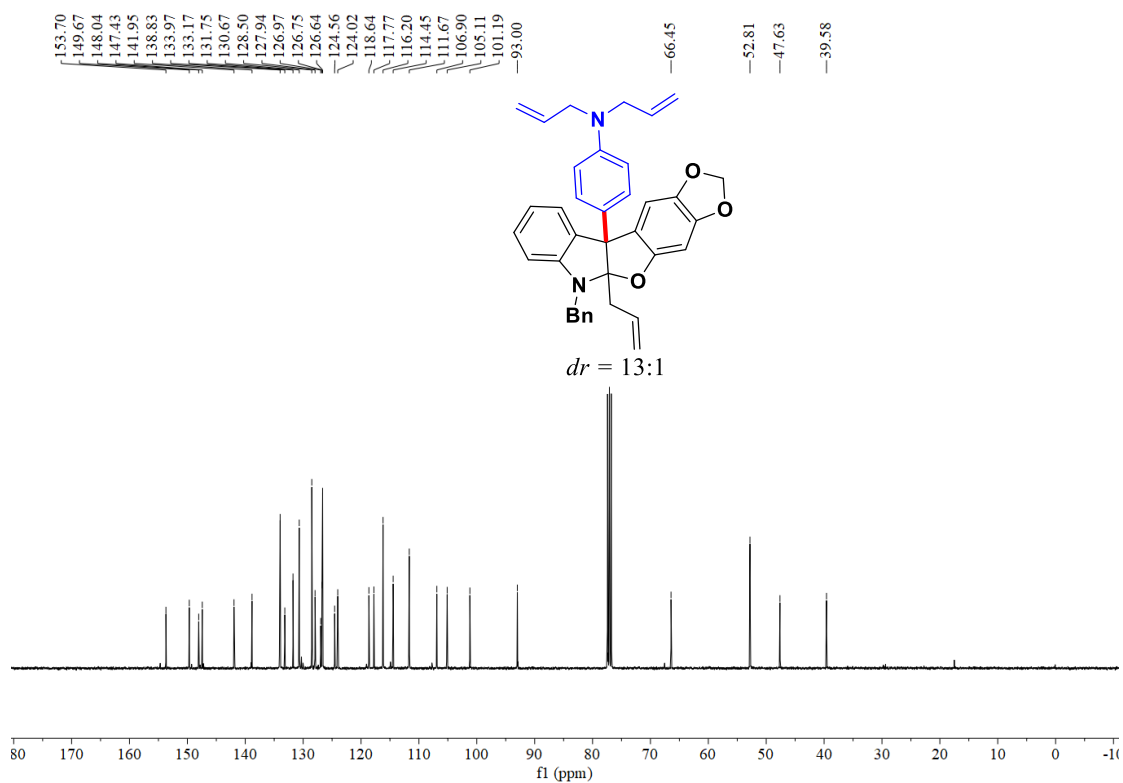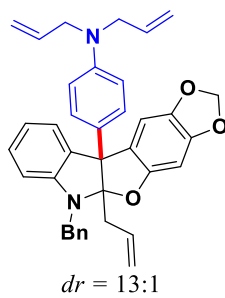

**5a-allyl-6-benzyl-10b-(5-methylfuran-2-yl)-5a,10b-dihydro-6H-[1,3]dioxolo[4',5':5,6]benzofuro[2,3-b]indole (11e)**

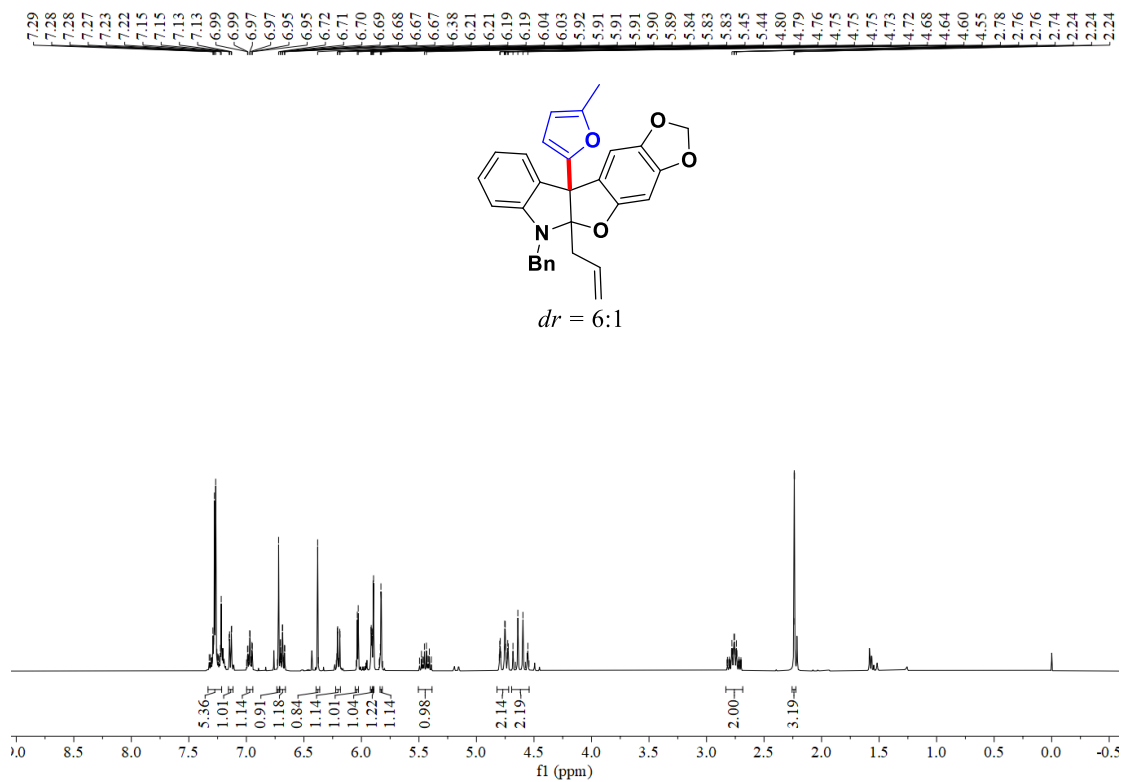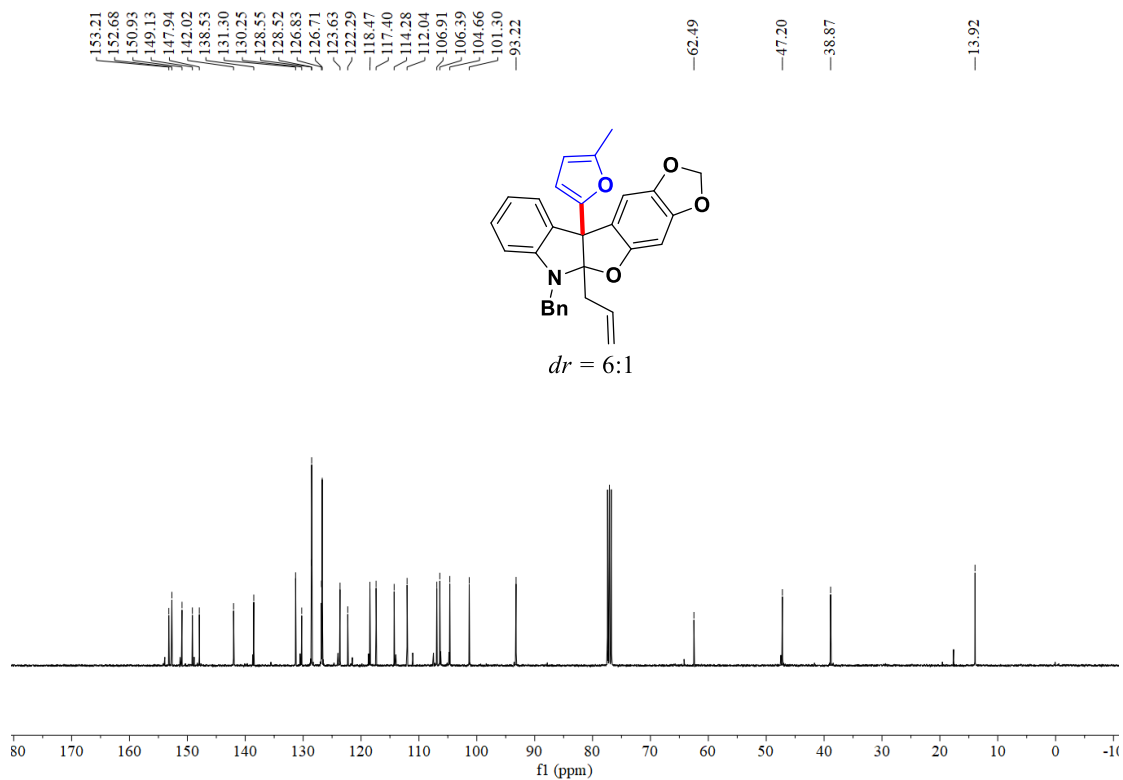

**5a-allyl-6-benzyl-10b-(ethylthio)-5a,10b-dihydro-6H-[1,3]dioxolo[4',5':5,6]benzofuro[2,3-b]indole (11f)**

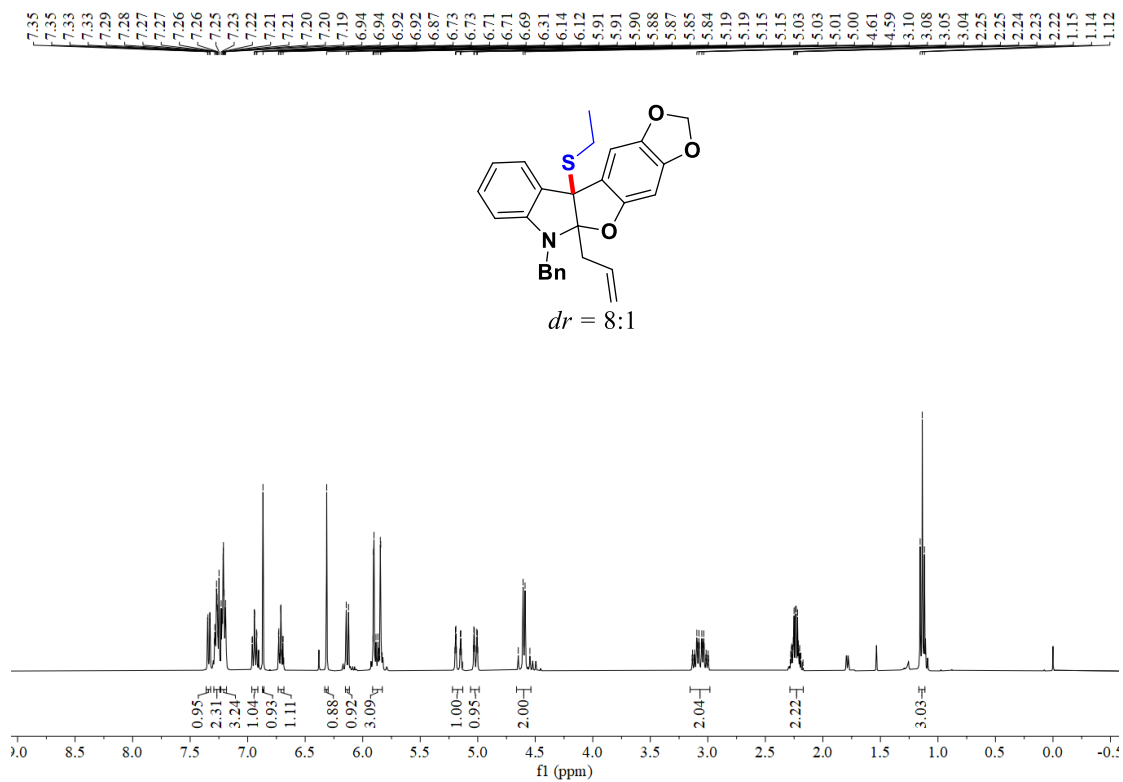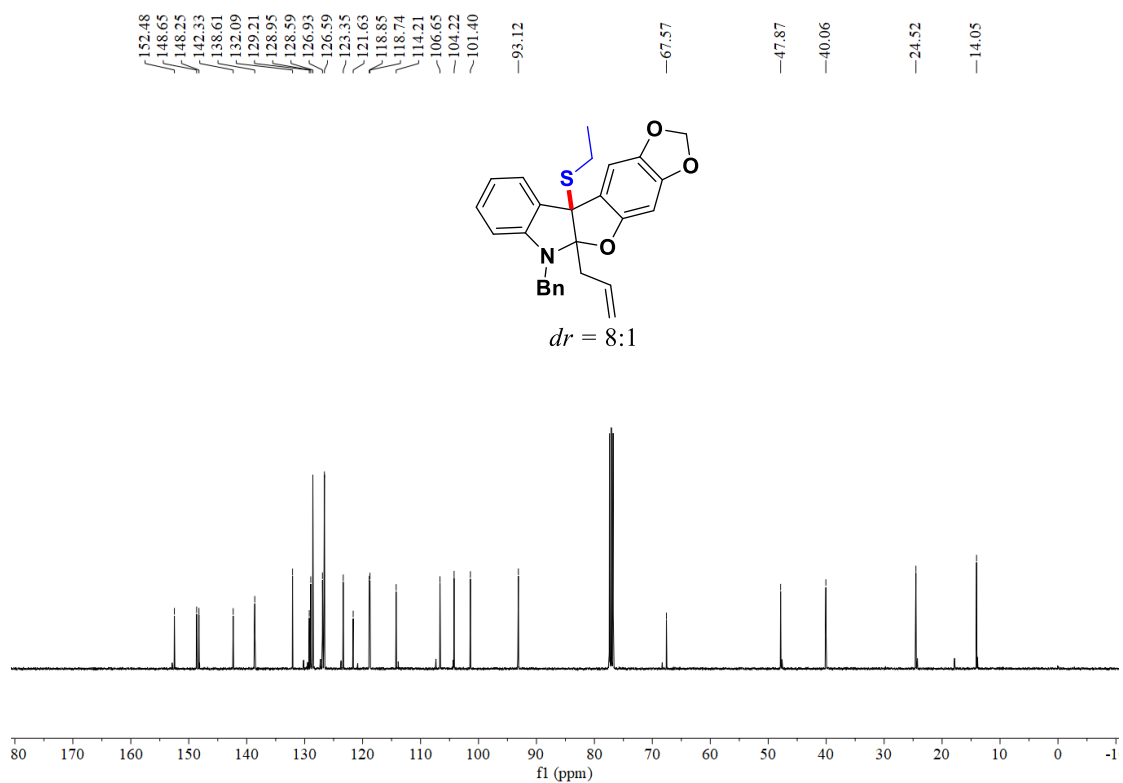

**2-allyl-3-(4-(diallylamino)phenyl)-3-(2-hydroxy-5-methoxyphenyl)-5-methoxy-2,3-dihydrobenzofuran-2-ol (12a)**

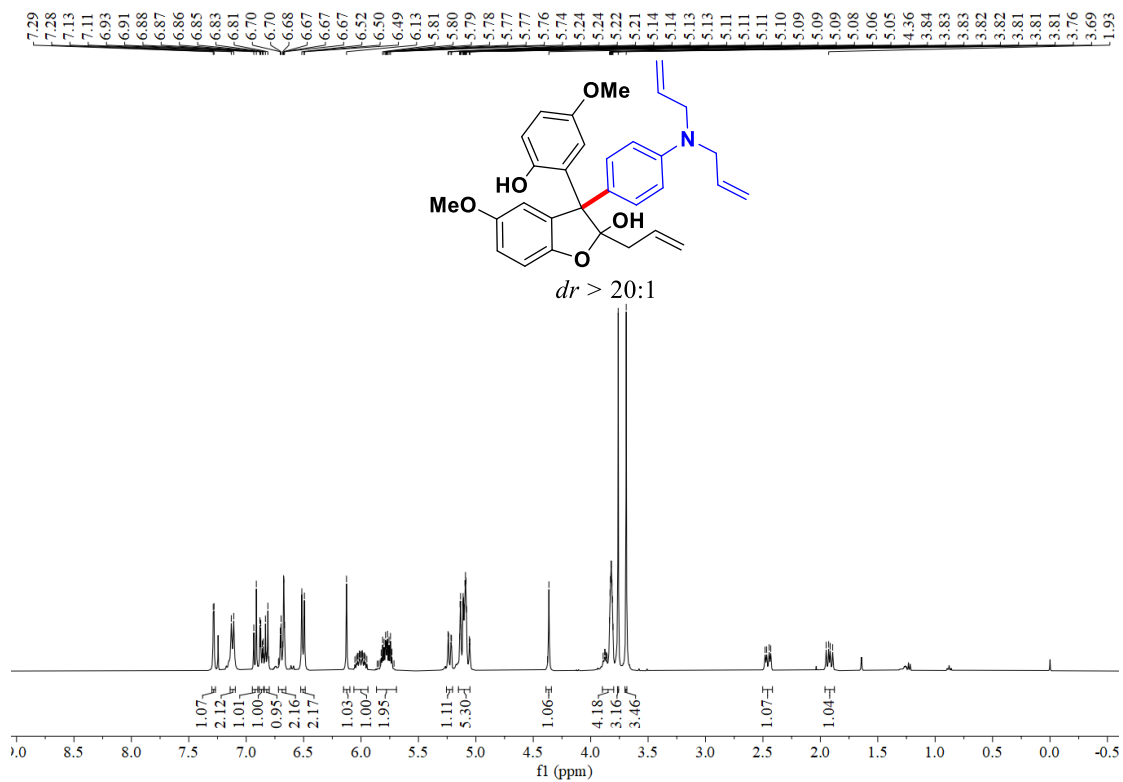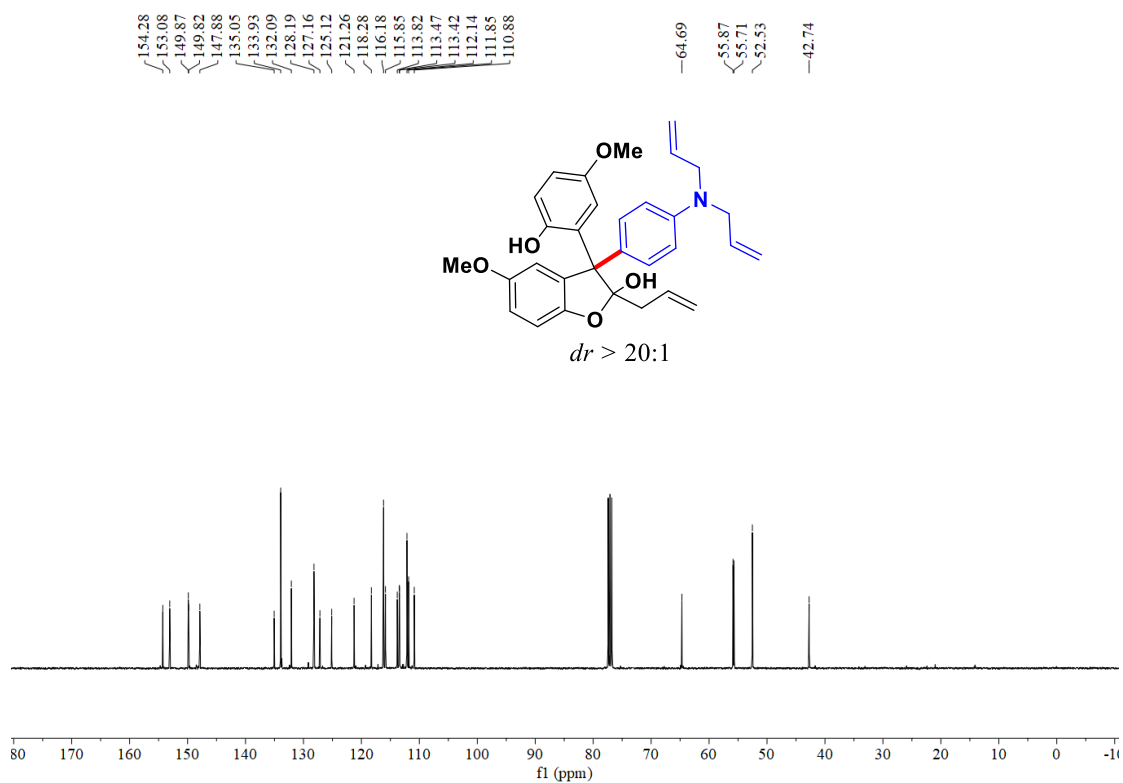

**6-(1-benzyl-3-(4-(diallylamino)phenyl)-2-oxoindolin-3-yl)benzo[d][1,3]dioxol-5-yl trifluoromethanesulfonate (13)**

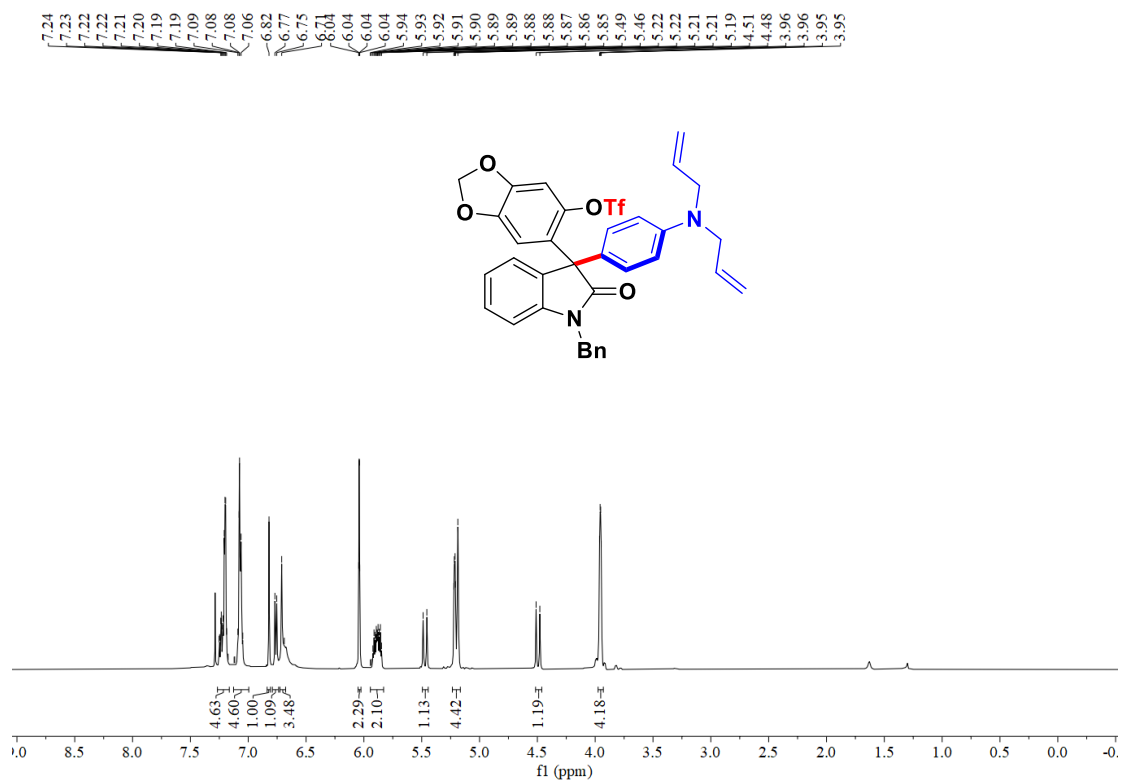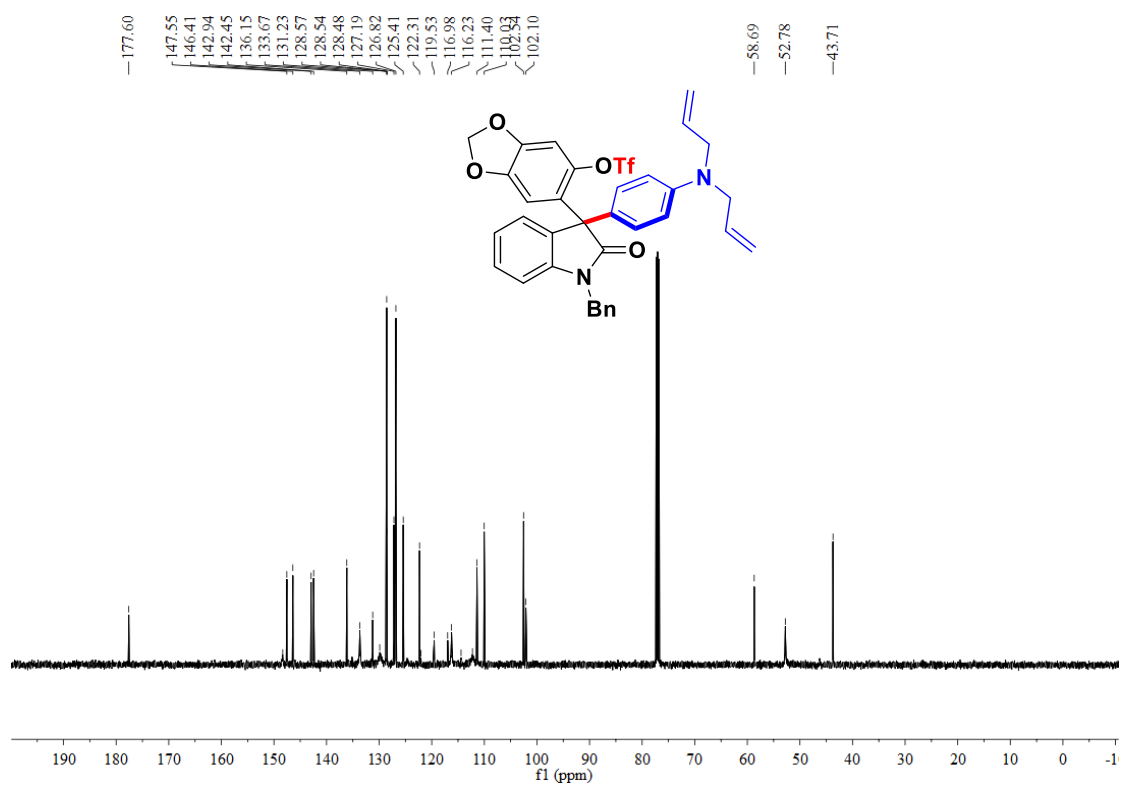



2,2'-((4-(diallylamino)phenyl)methylene)bis(4-methoxyphenol) (14)

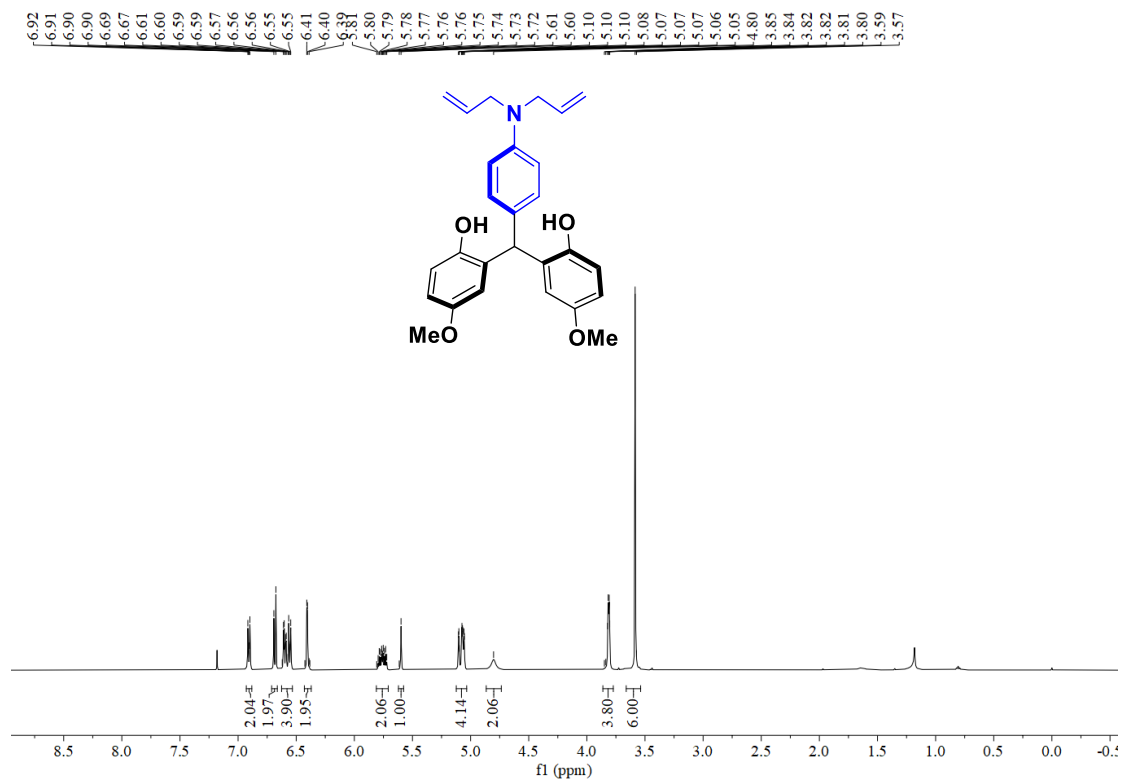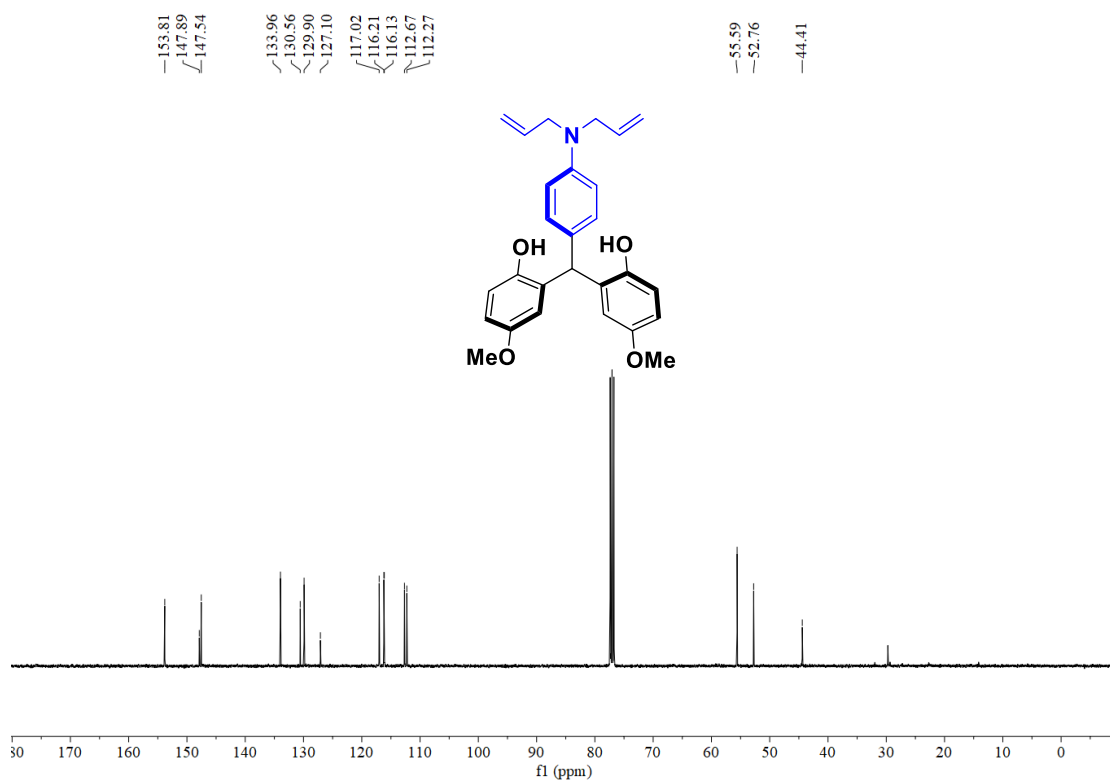

Supplement: d4qo01641f1.pdf [file d4qo01641f1.pdf]
